# Supplementary material
Source: PubMed Central journal article supplement (PMC4075522)
Supplement: rna-11-373-s02.pdf [file rna-11-373-s02.pdf]

## Supplemental Material to:

Xiaoxia Ma, Chaogang Shao, Yongfeng Jin,  
Huizhong Wang, and Yijun Meng

Long non-coding RNAs: A novel endogenous source  
for the generation of Dicer-like 1-dependent small  
RNAs in *Arabidopsis thaliana*

2014; 11(4)

<http://dx.doi.org/10.4161/rna.28725>

[www.landesbioscience.com/journals/rnabiology/article/28725/](http://www.landesbioscience.com/journals/rnabiology/article/28725/)

### Supplemental Files

1. 2013RNABIOL0314R-SupData1-5
2. 2013RNABIOL0314R-SupFigs1-4
