# Supplementary material
Source: PubMed Central journal article supplement (PMC4075522)

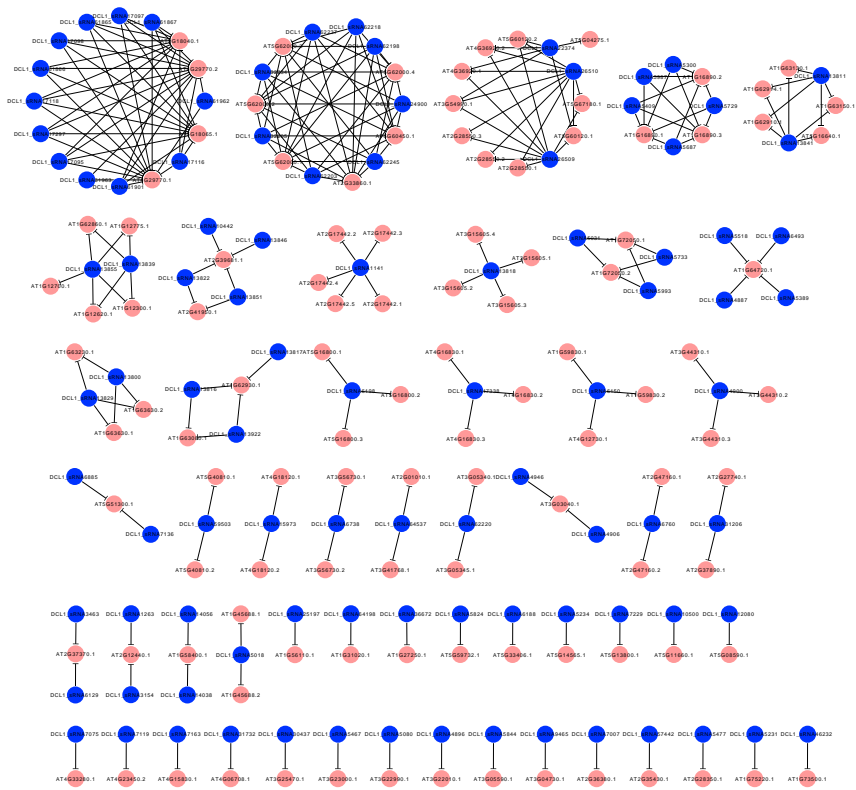

Supplement: rna-11-373-s01.pdf [file rna-11-373-s01.pdf]

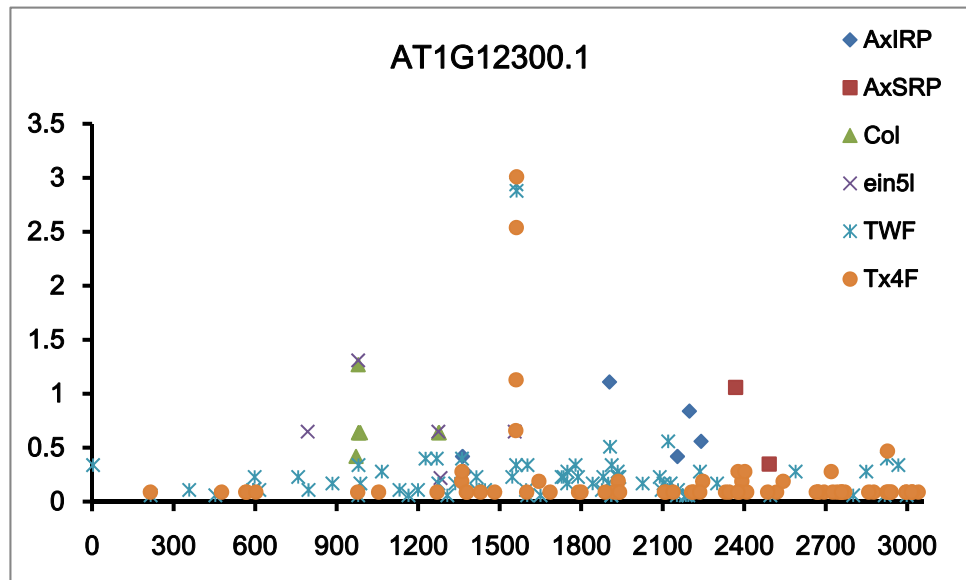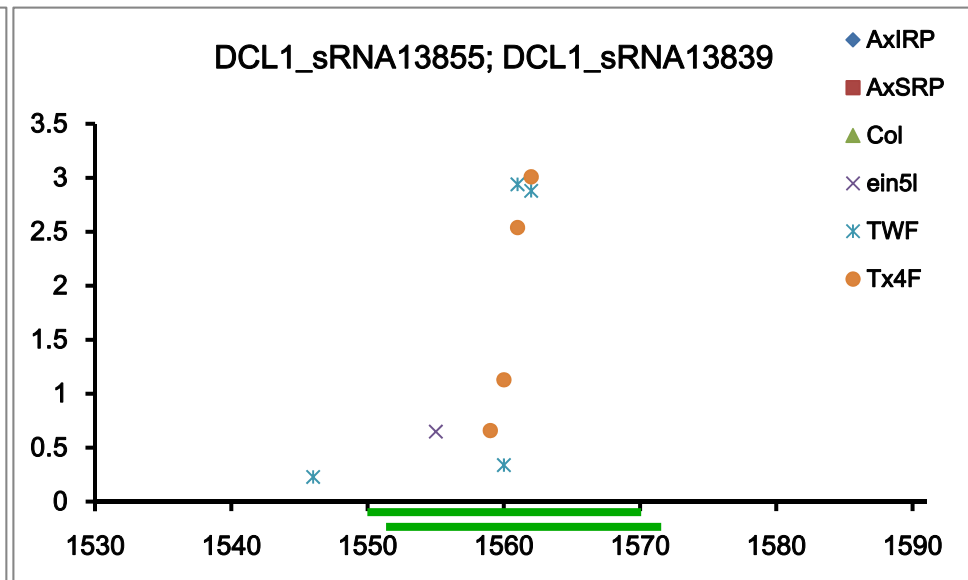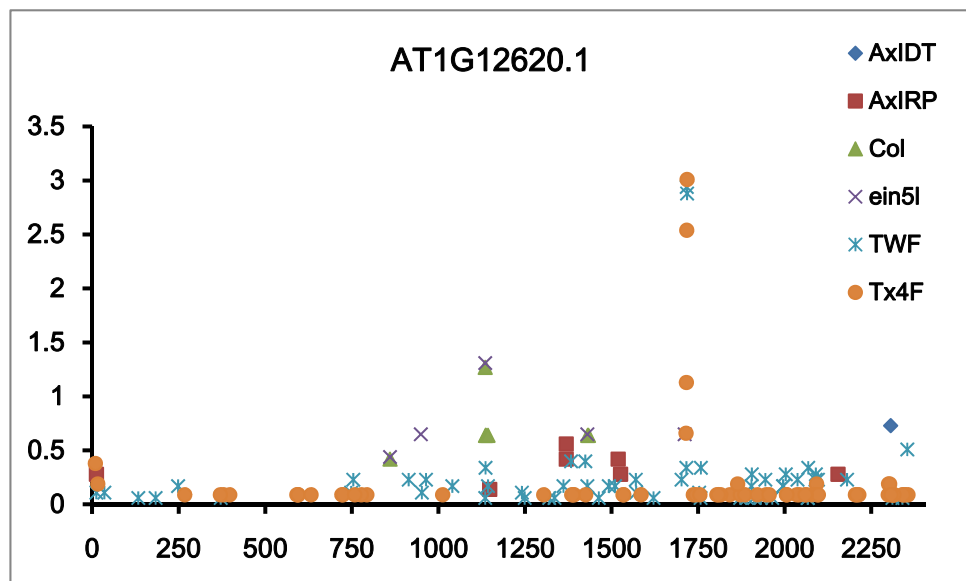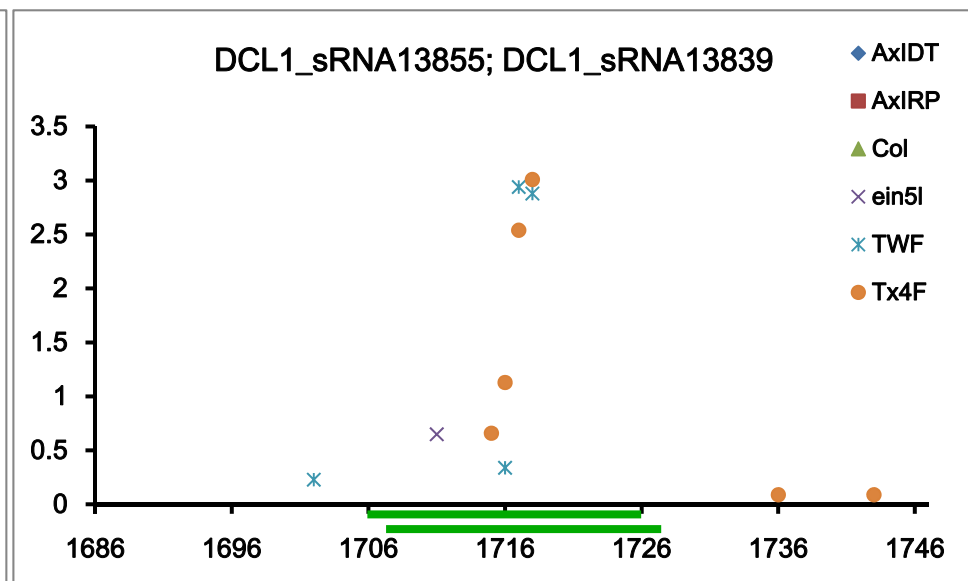

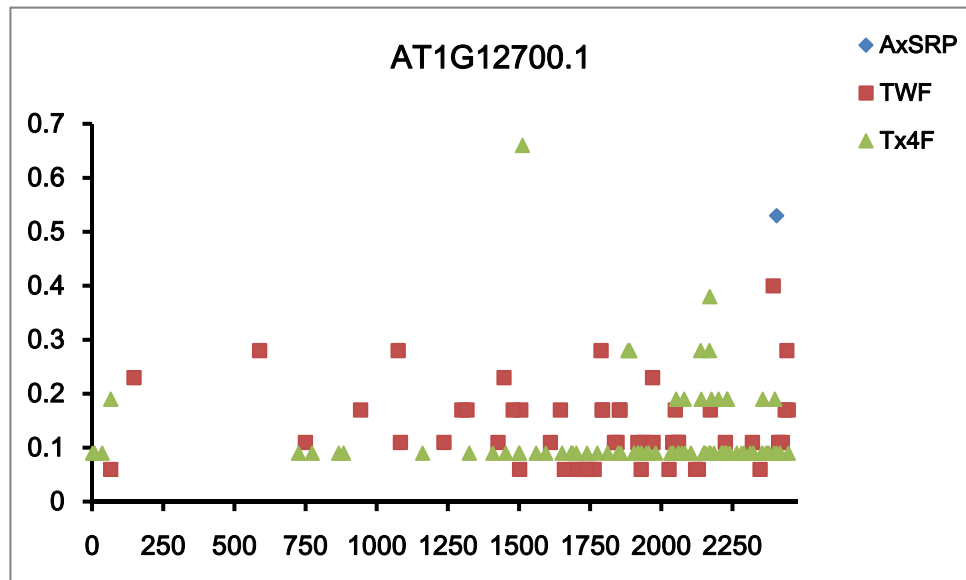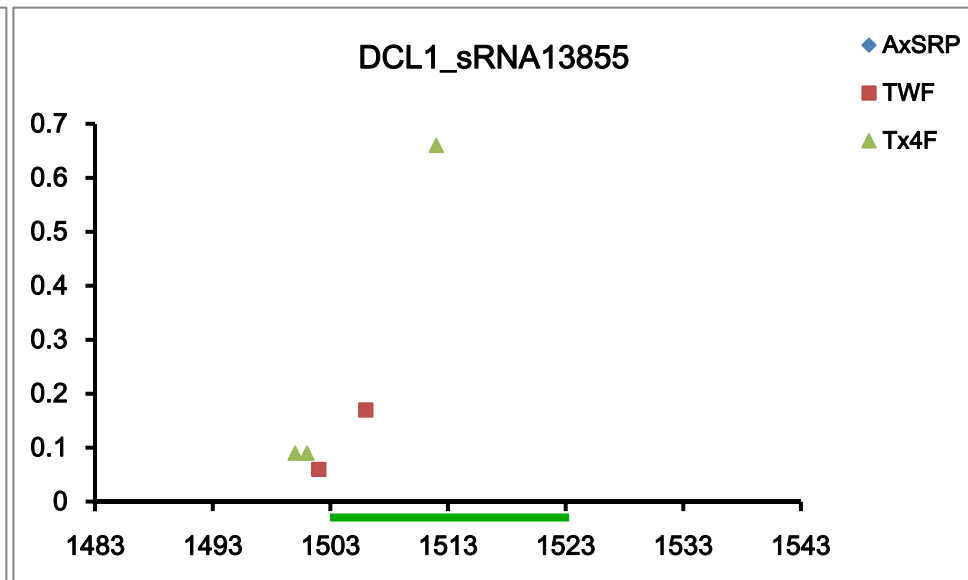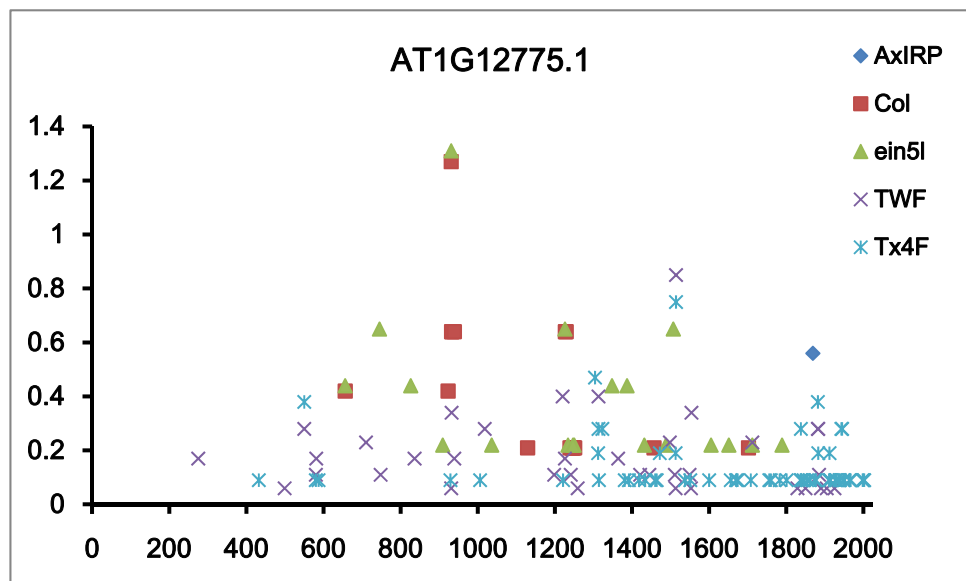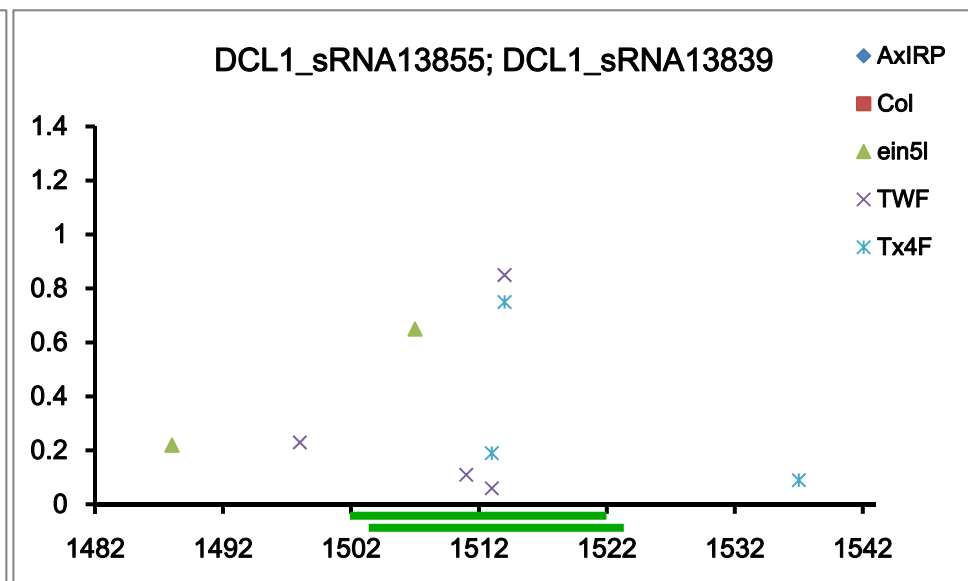

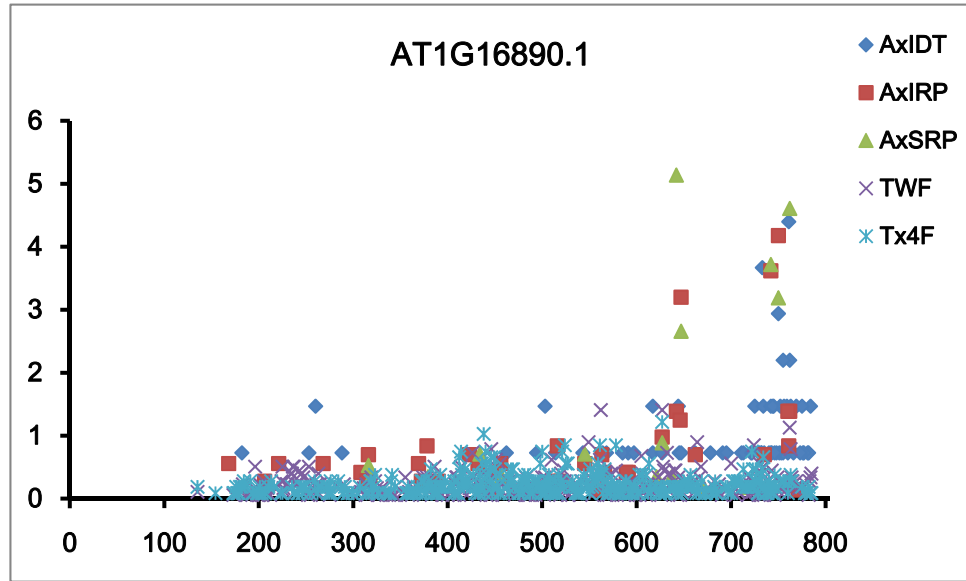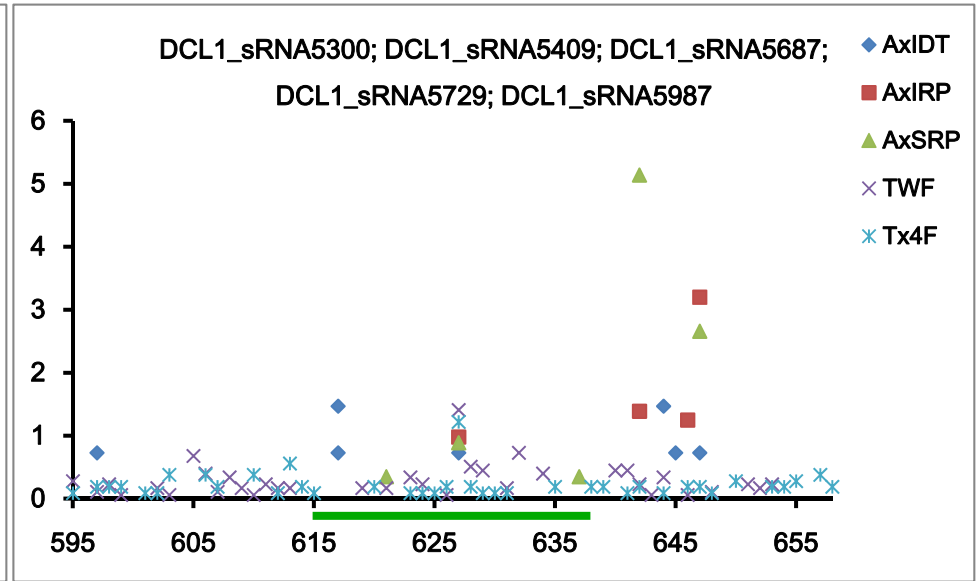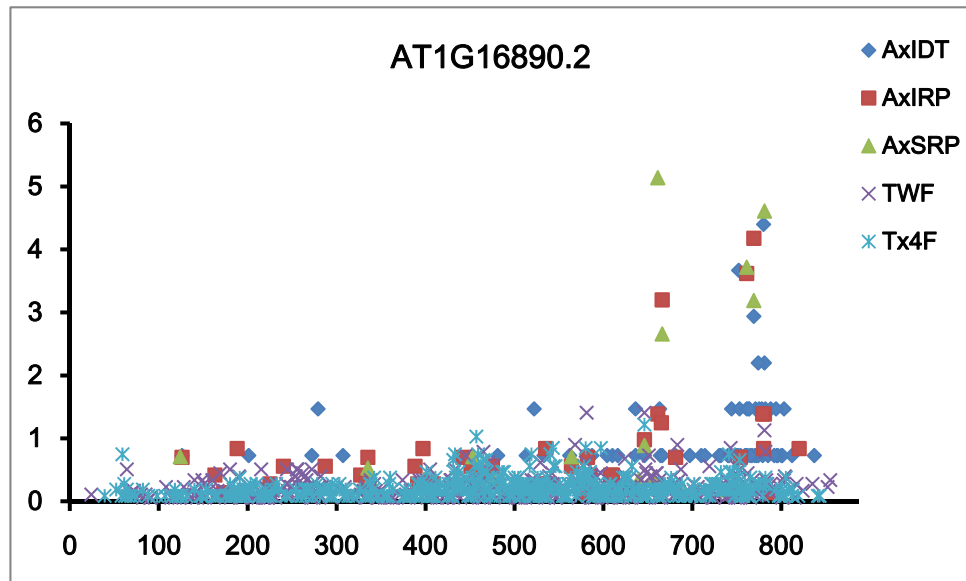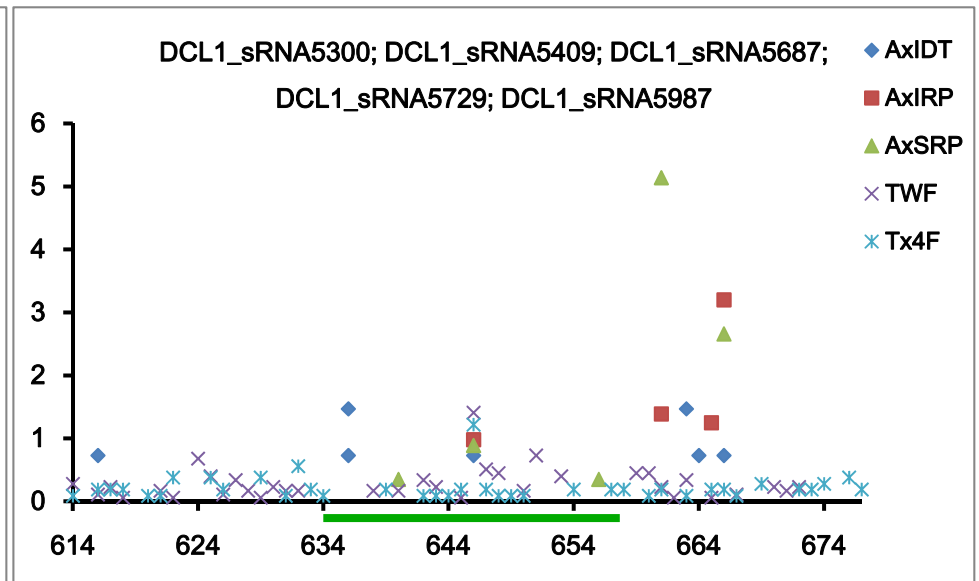

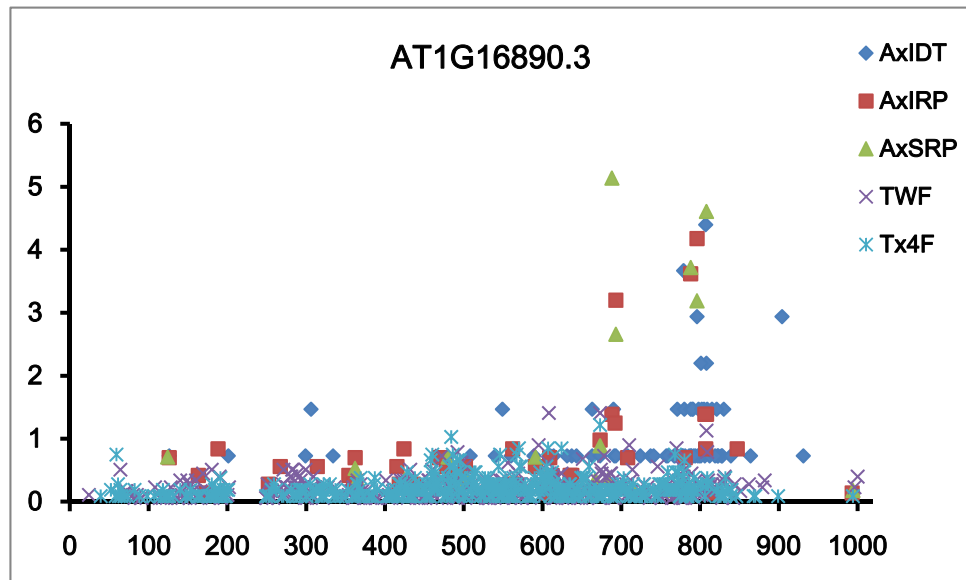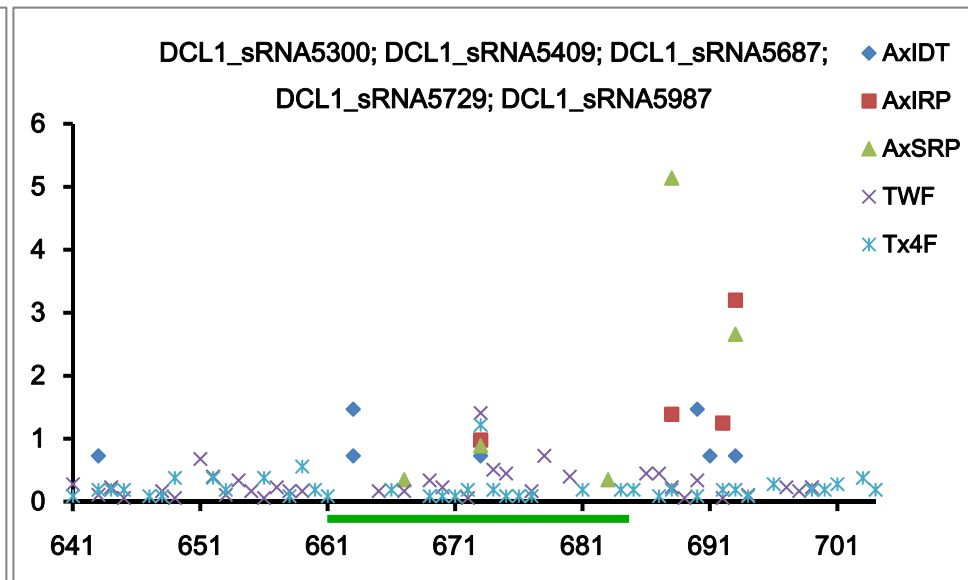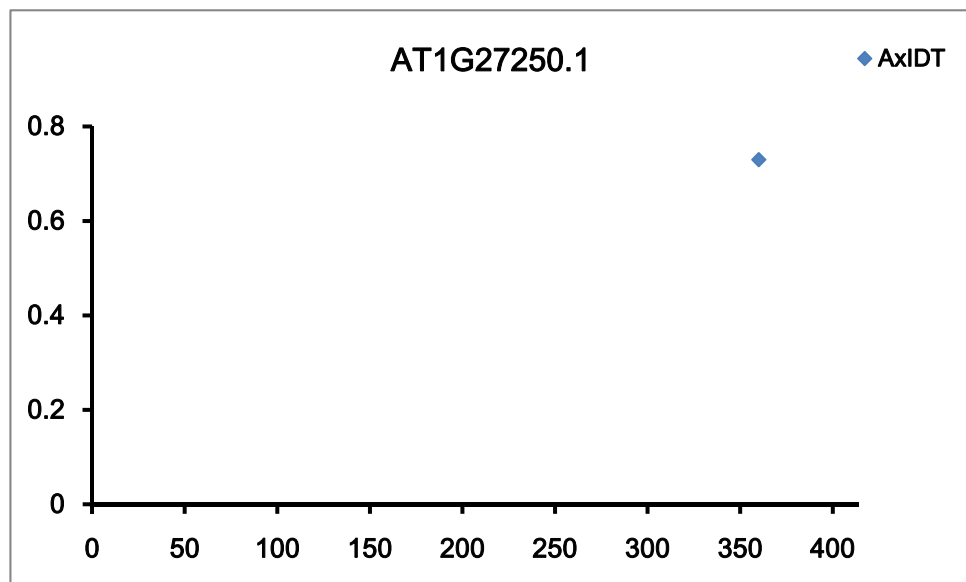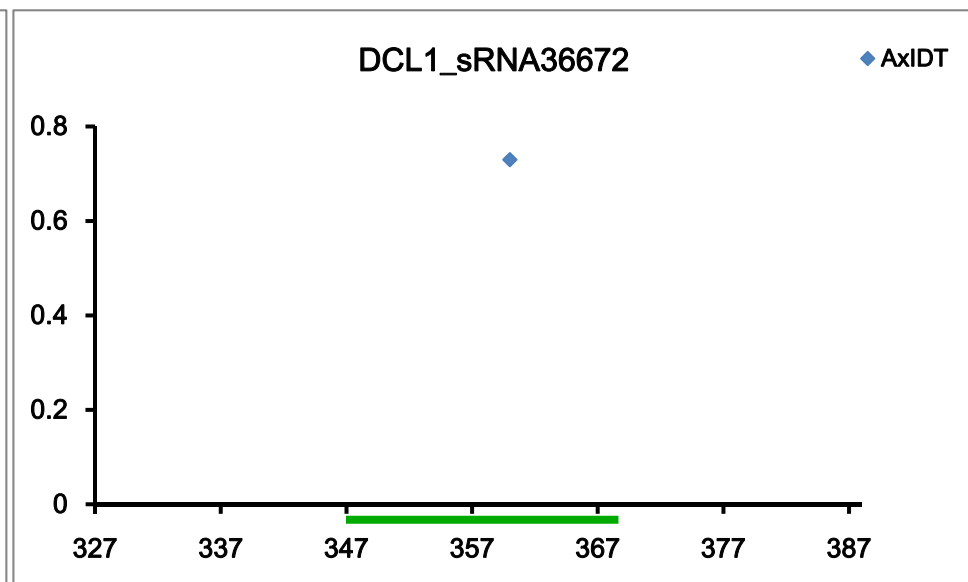

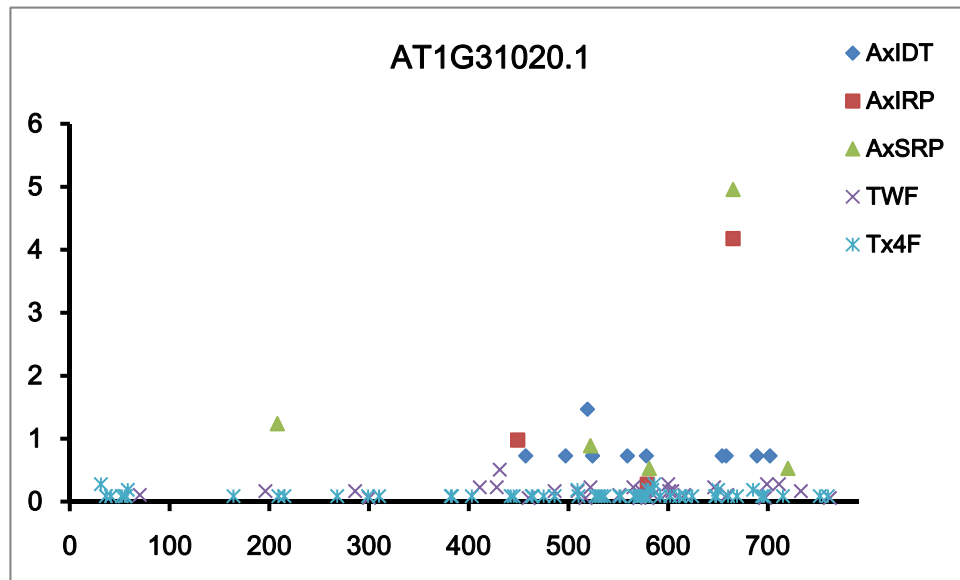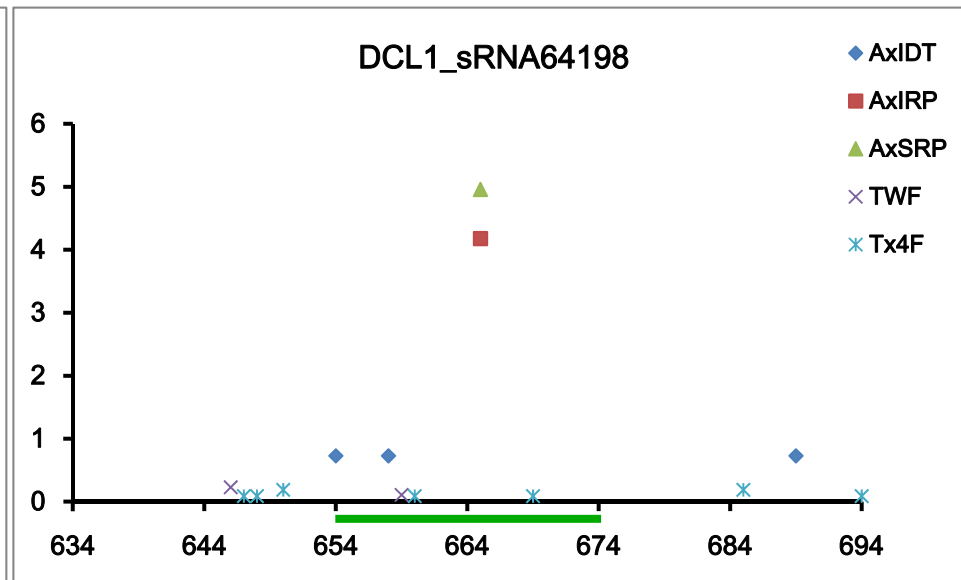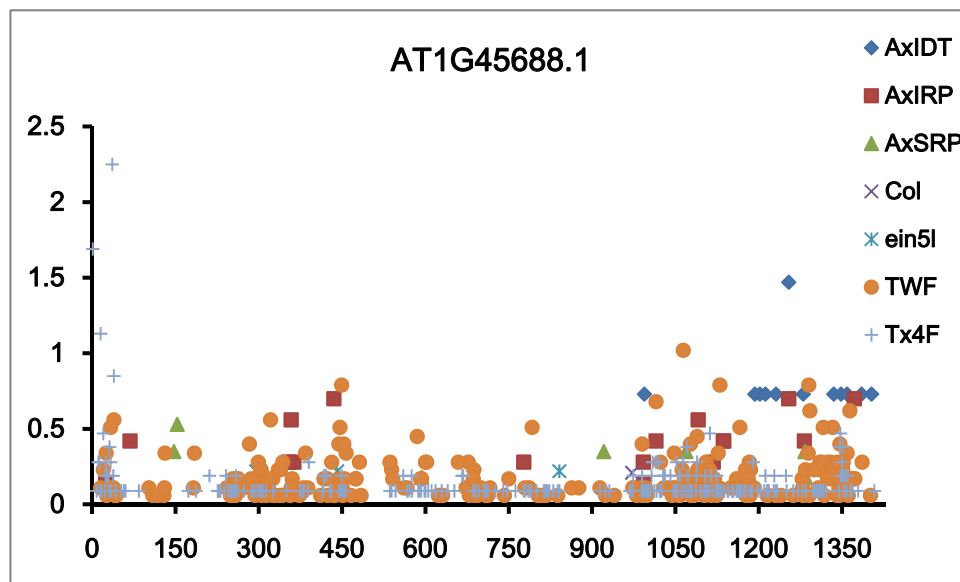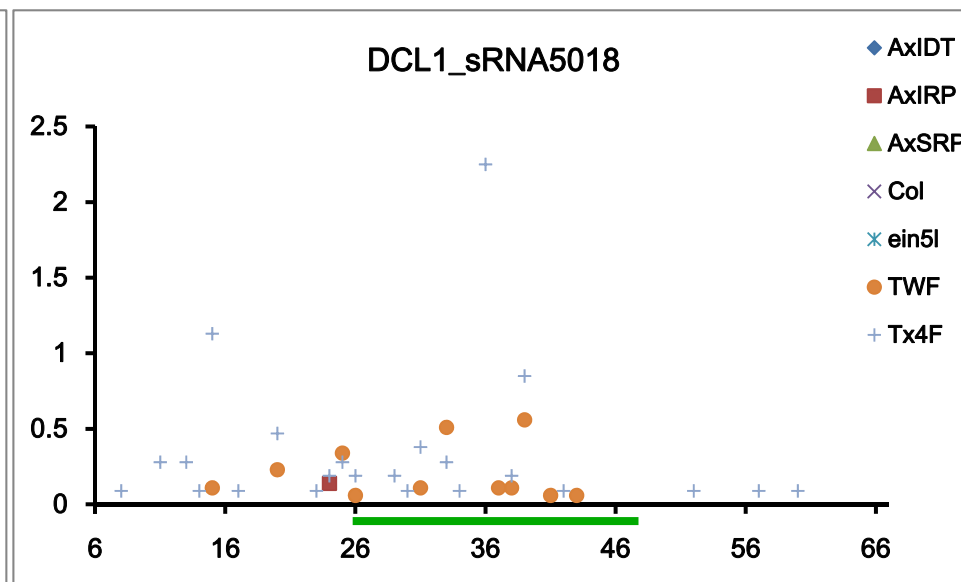

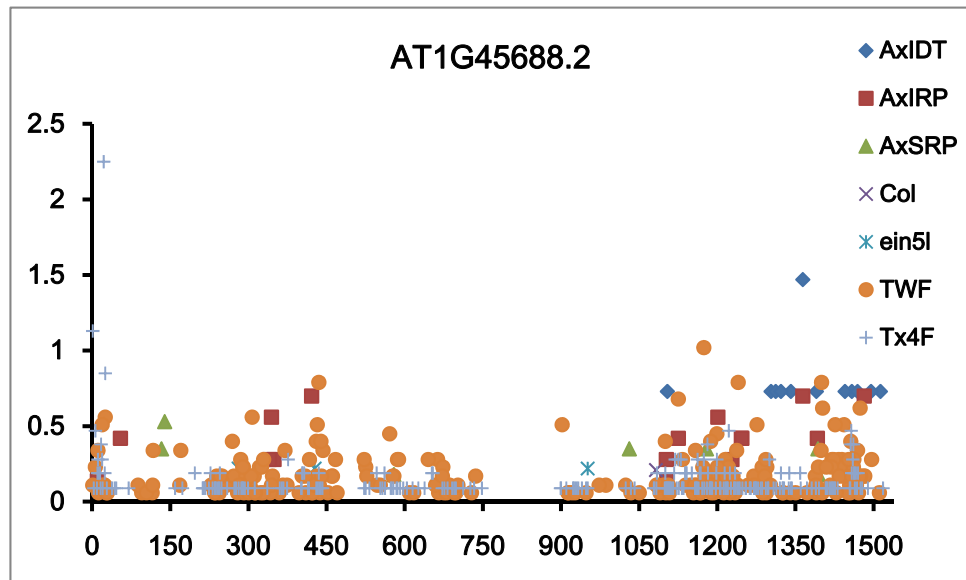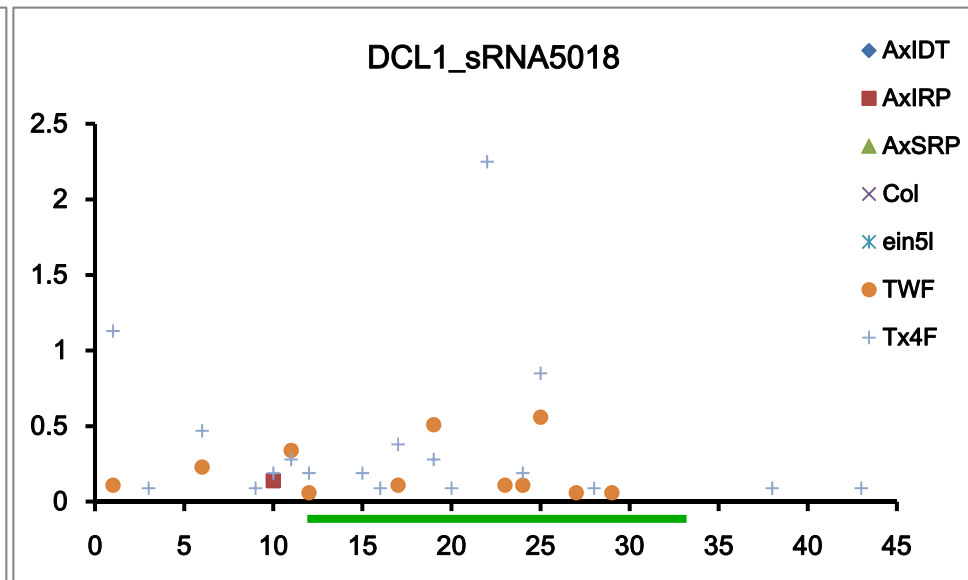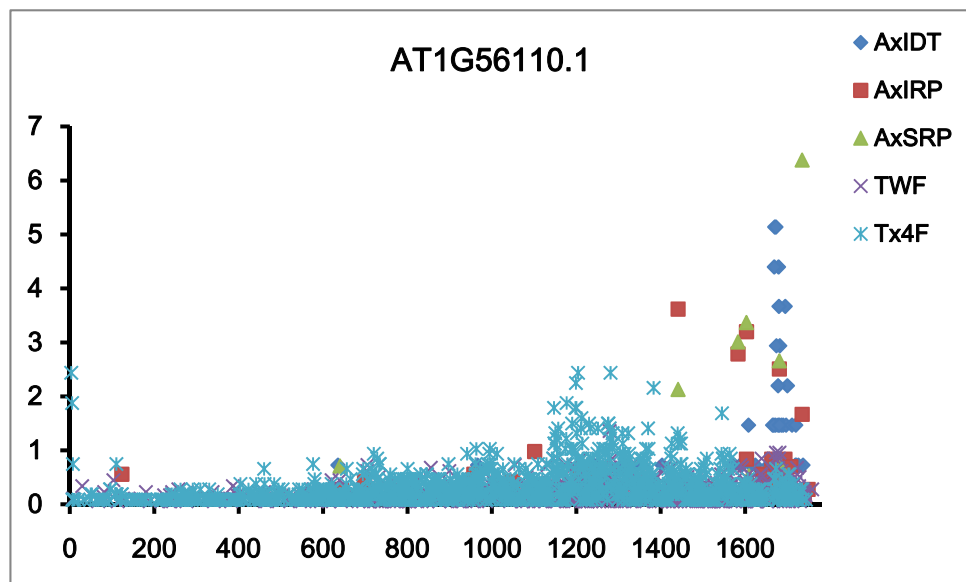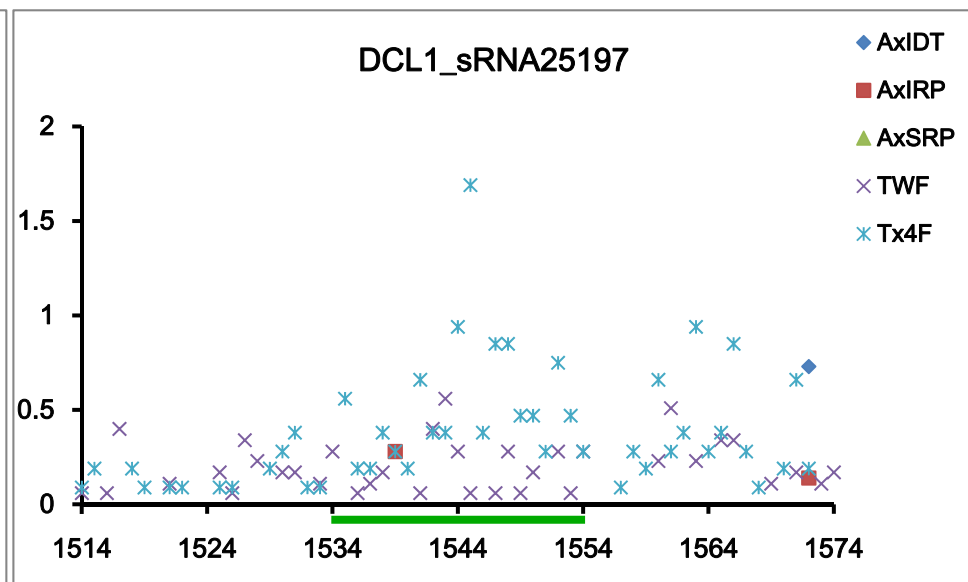

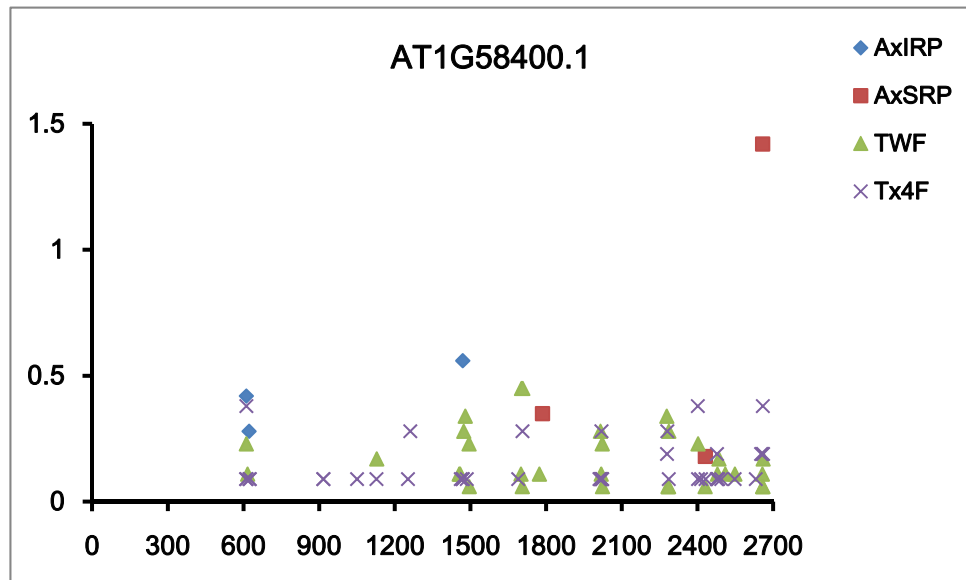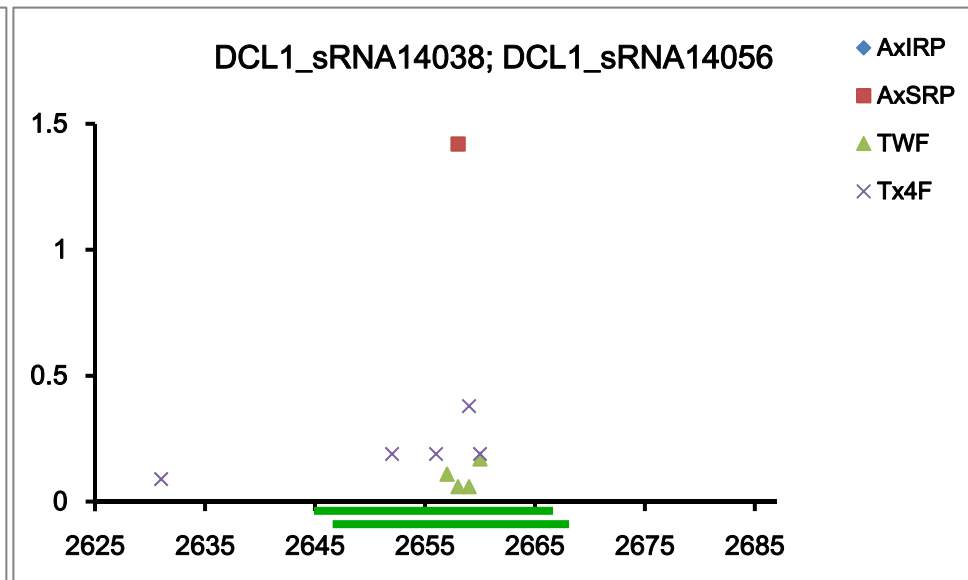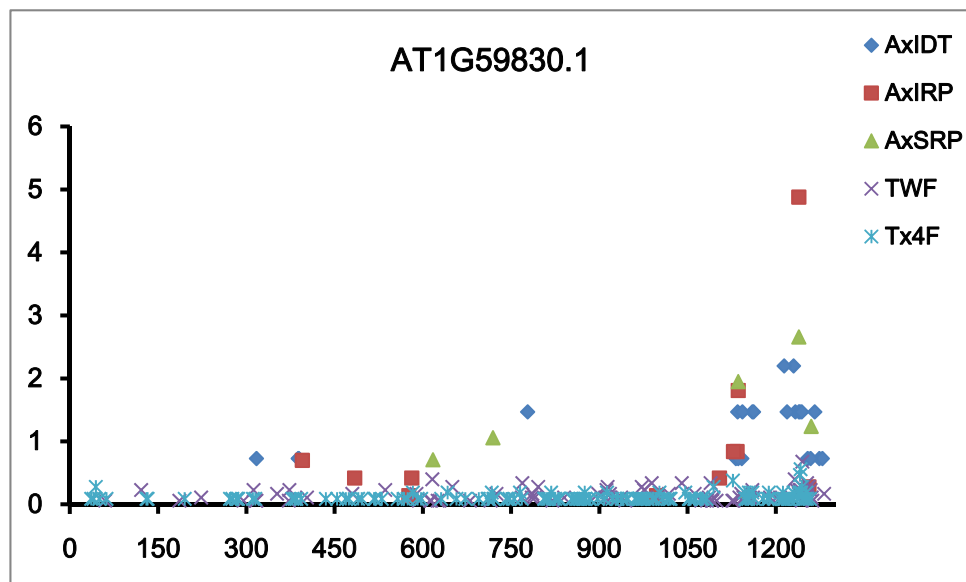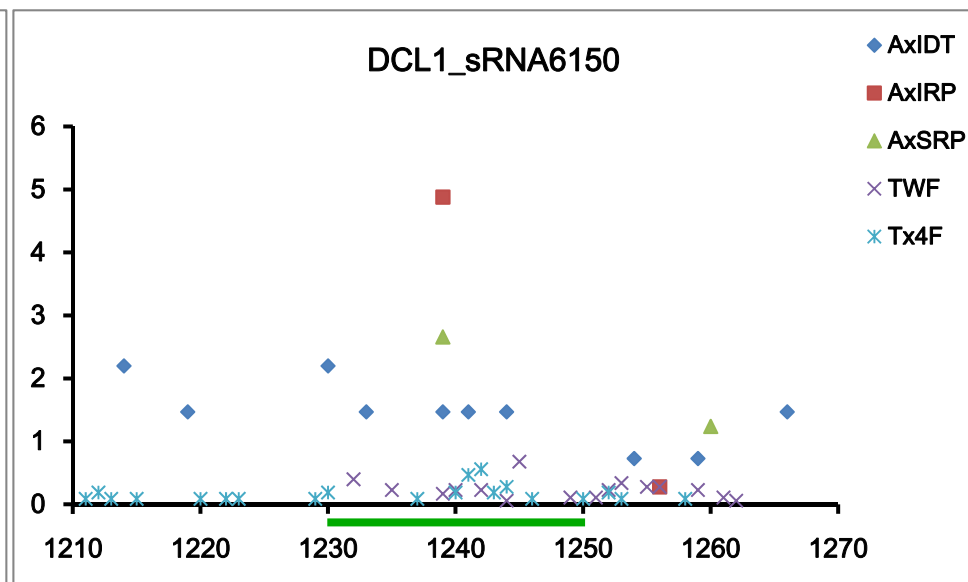

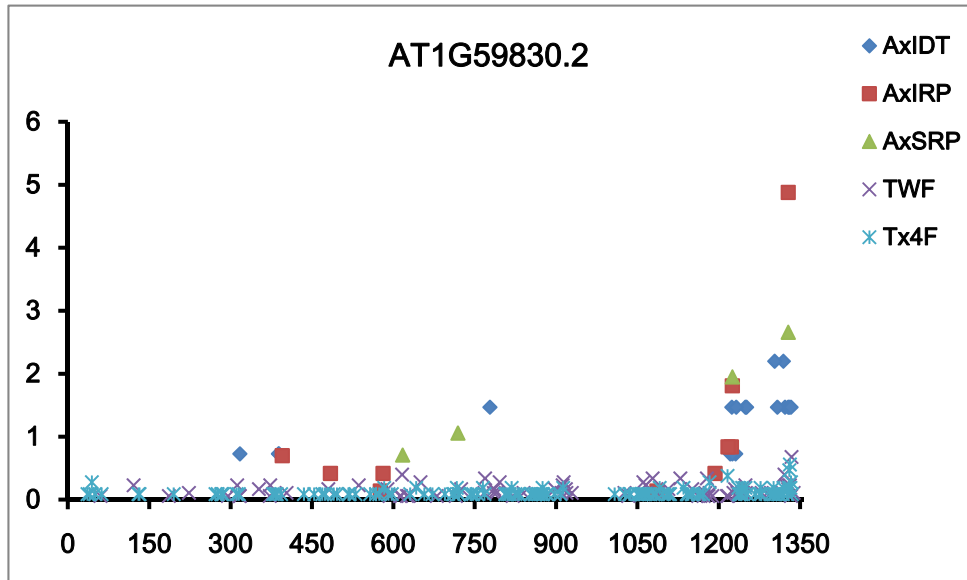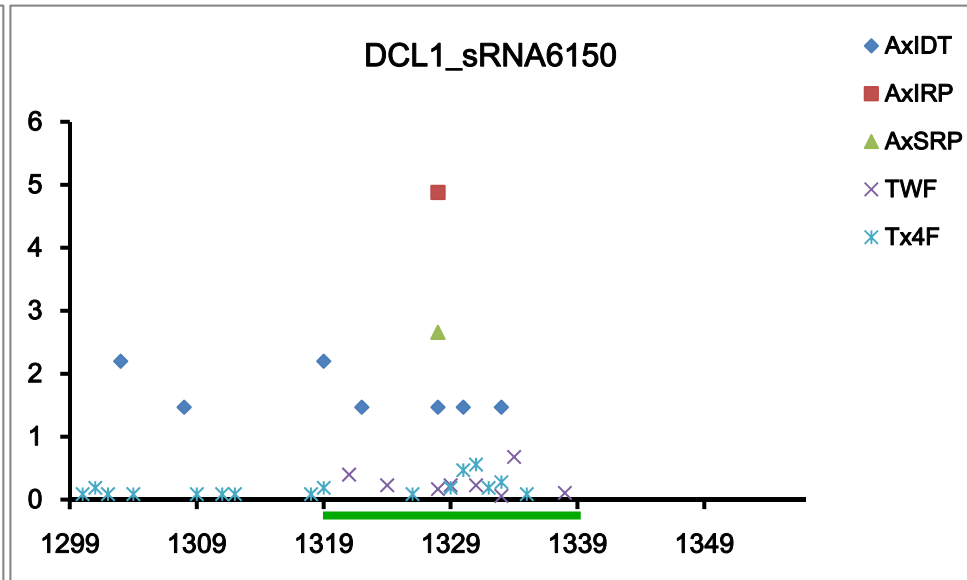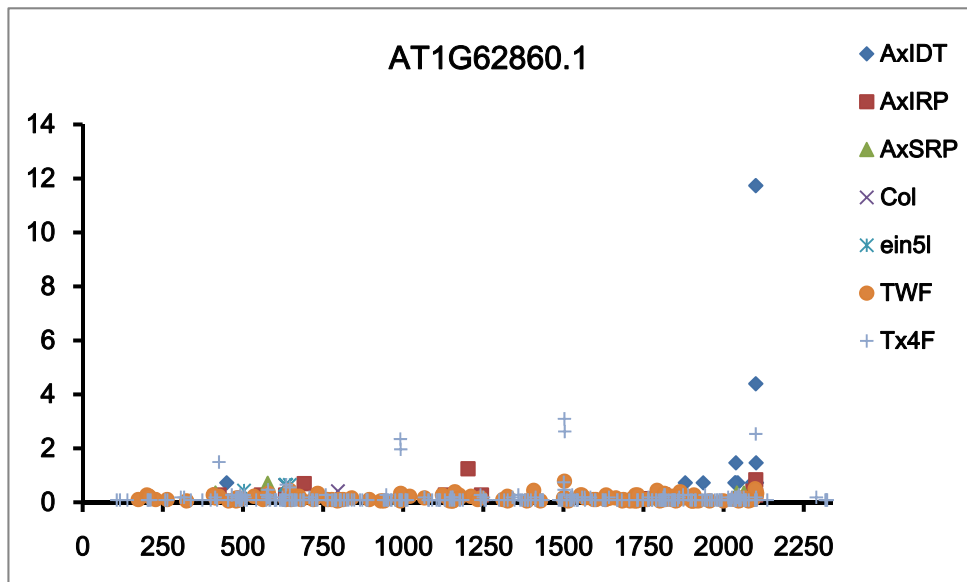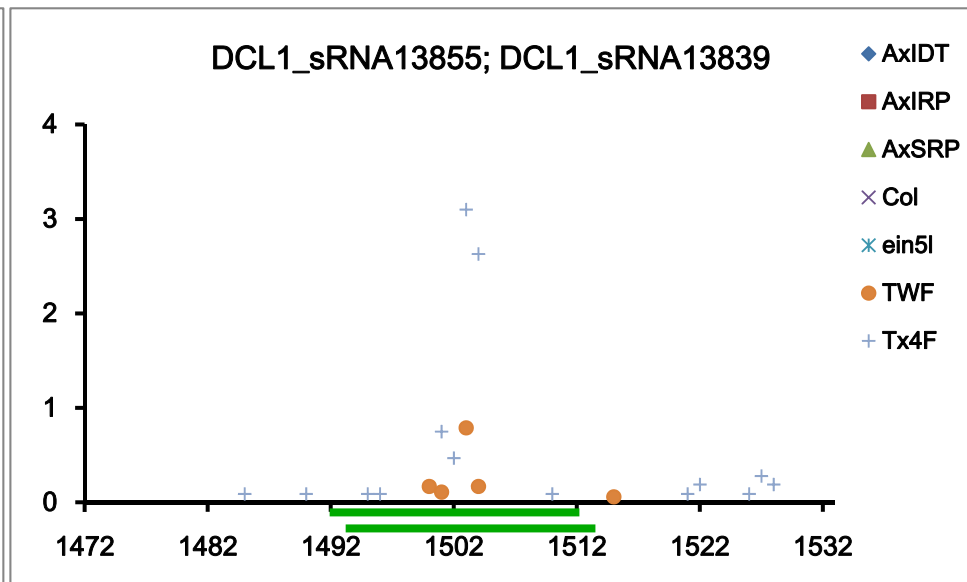



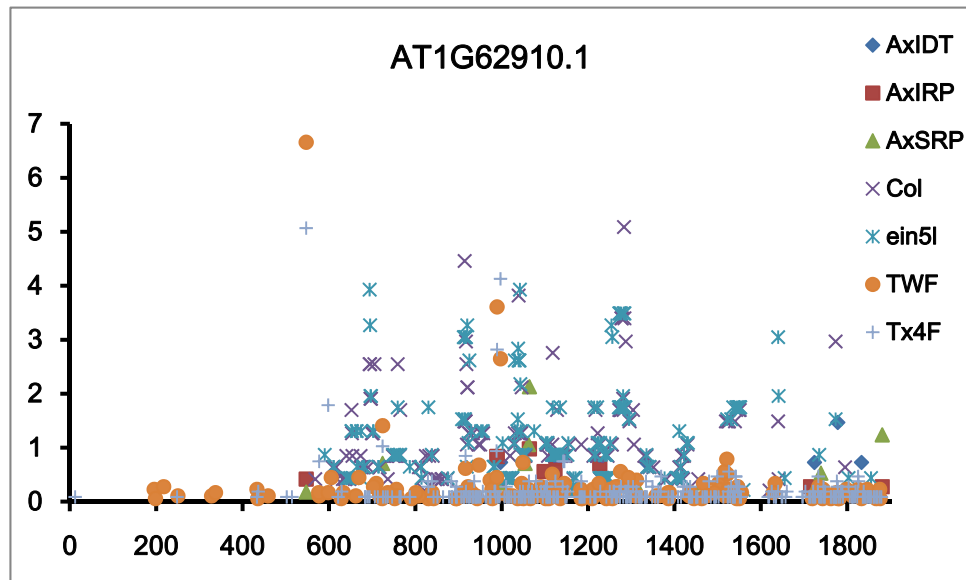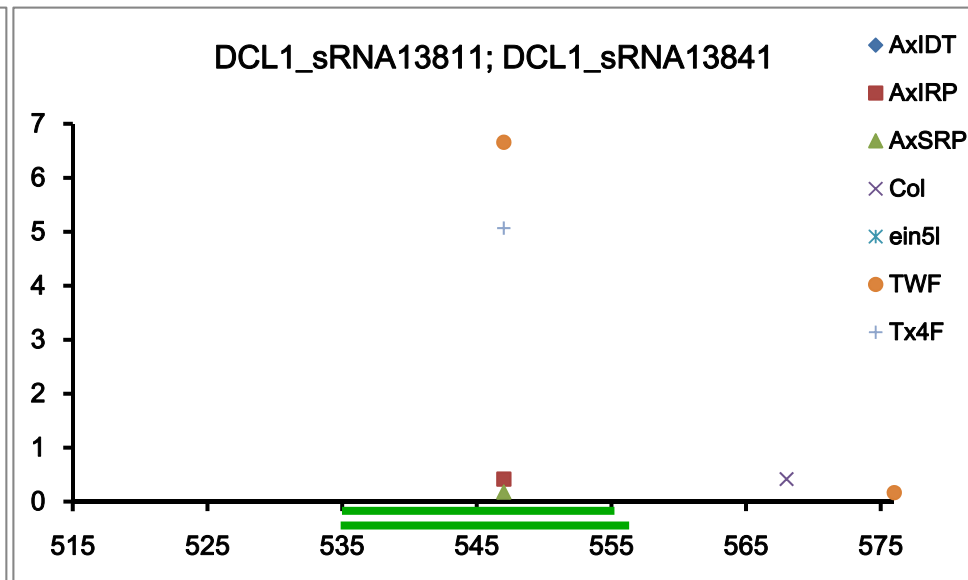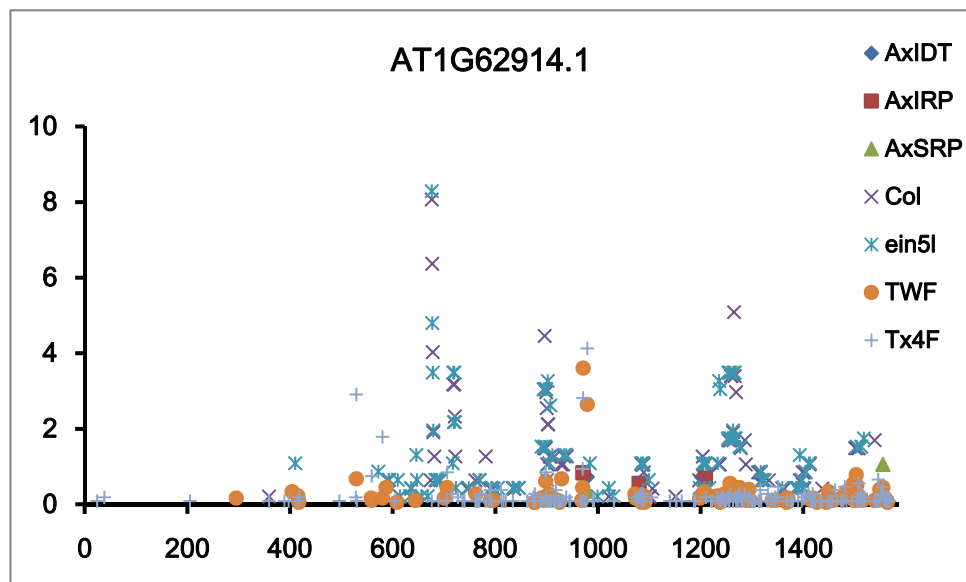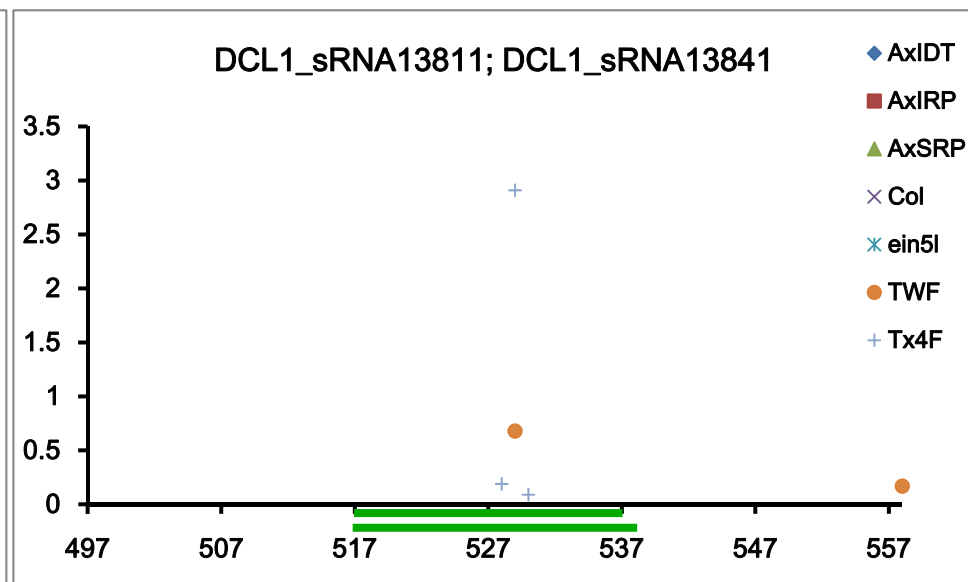

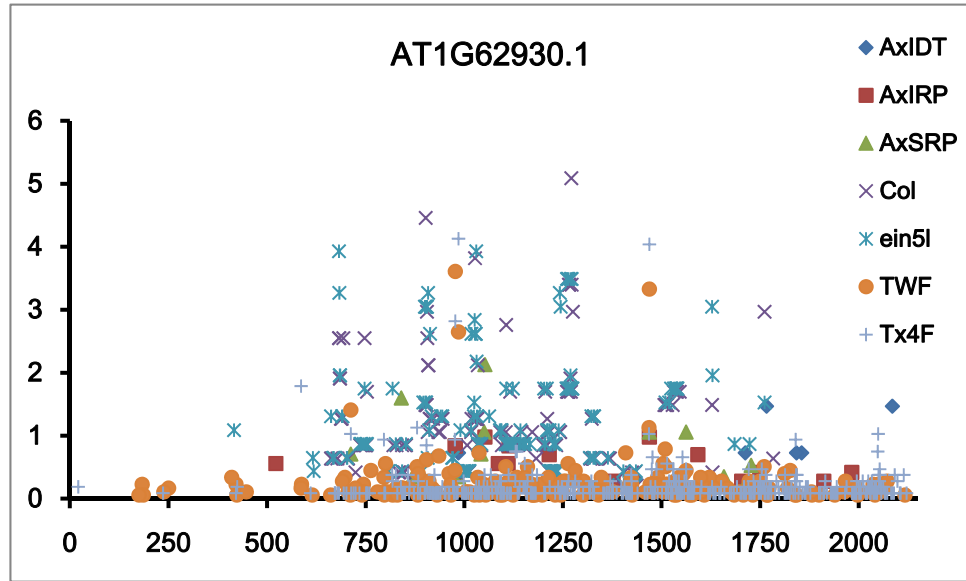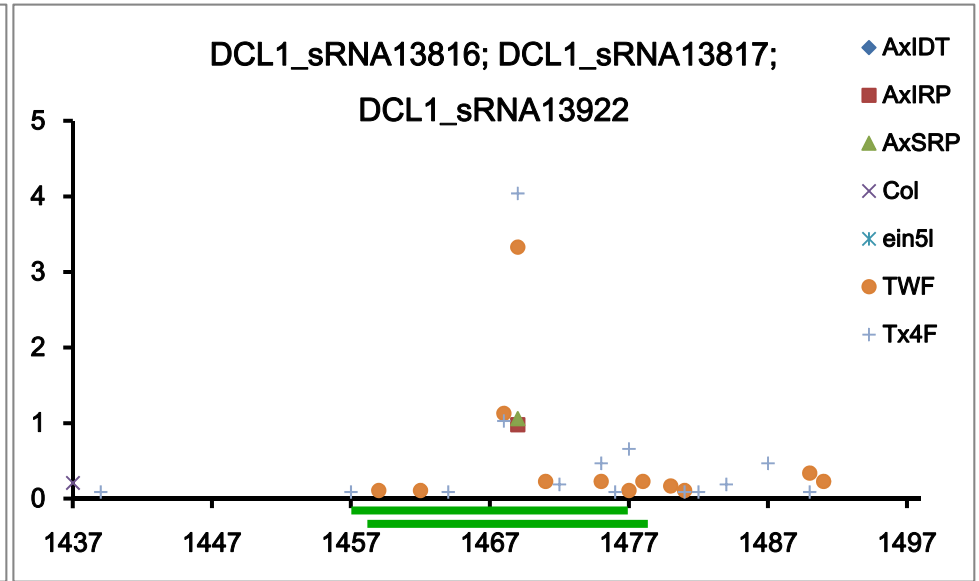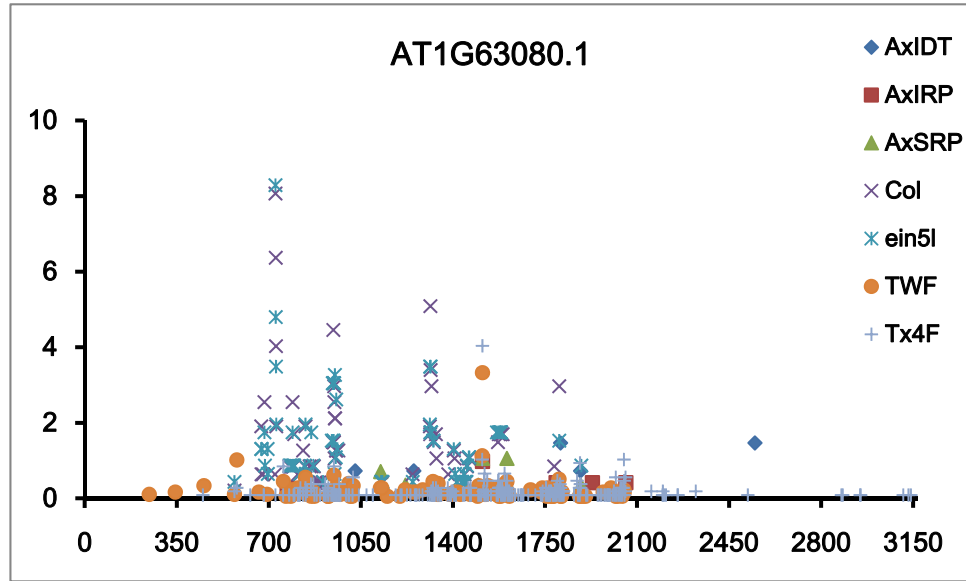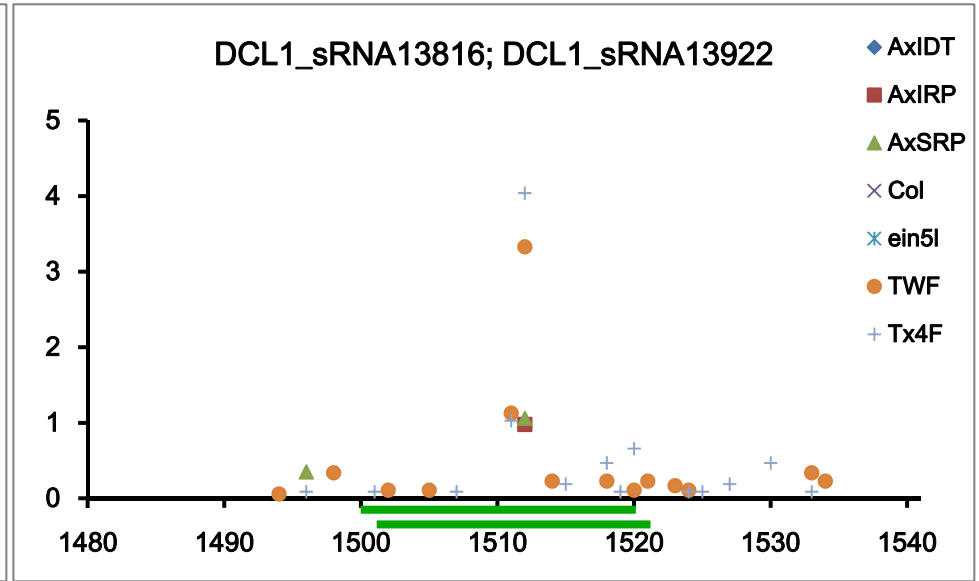

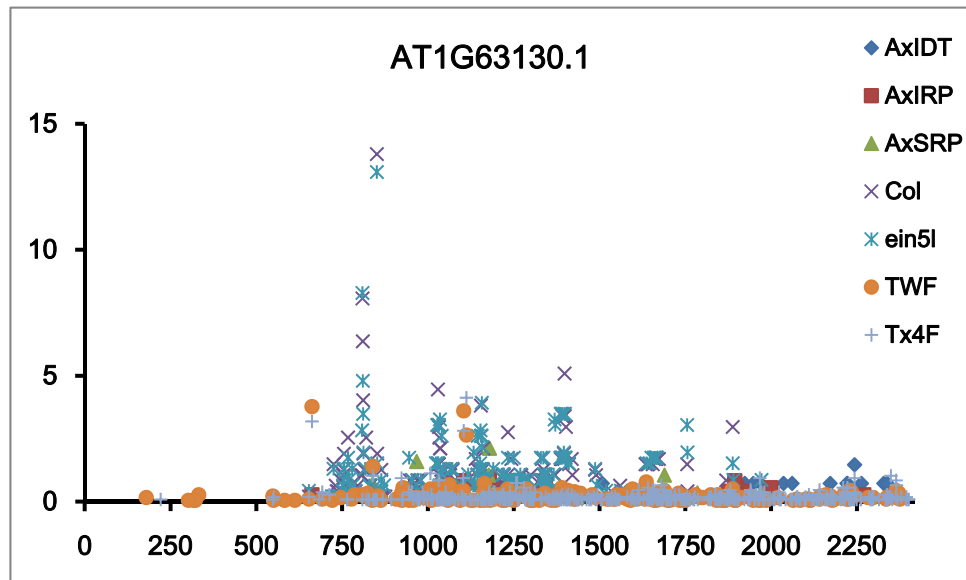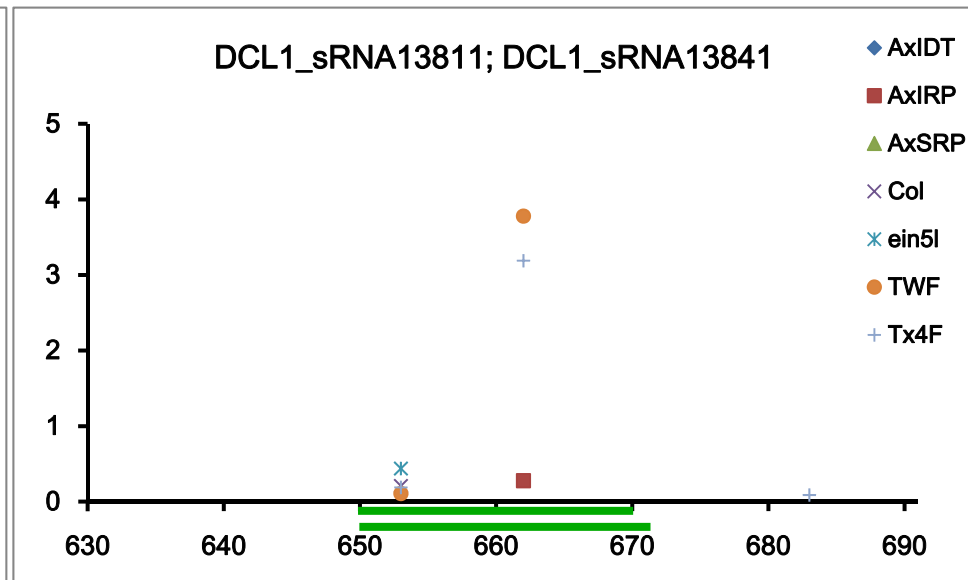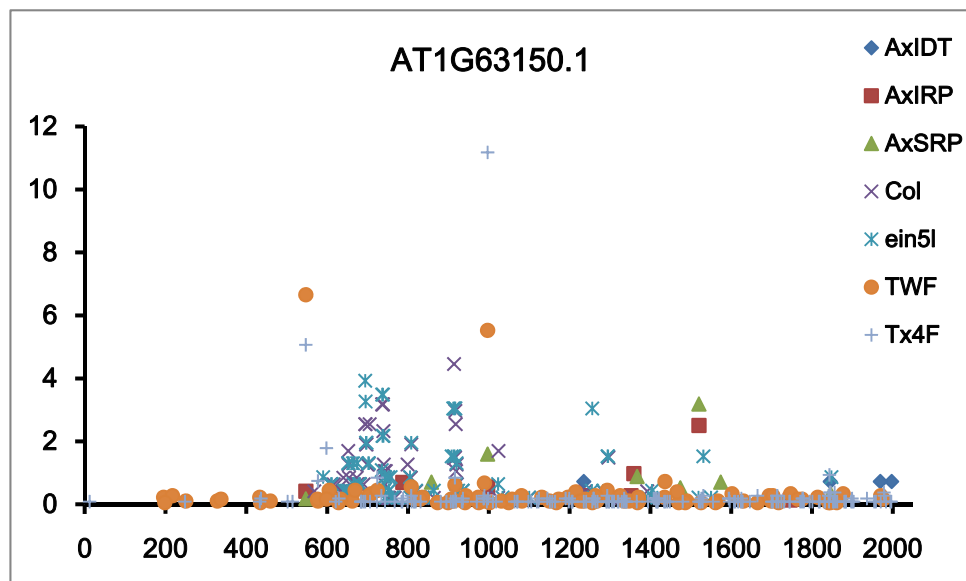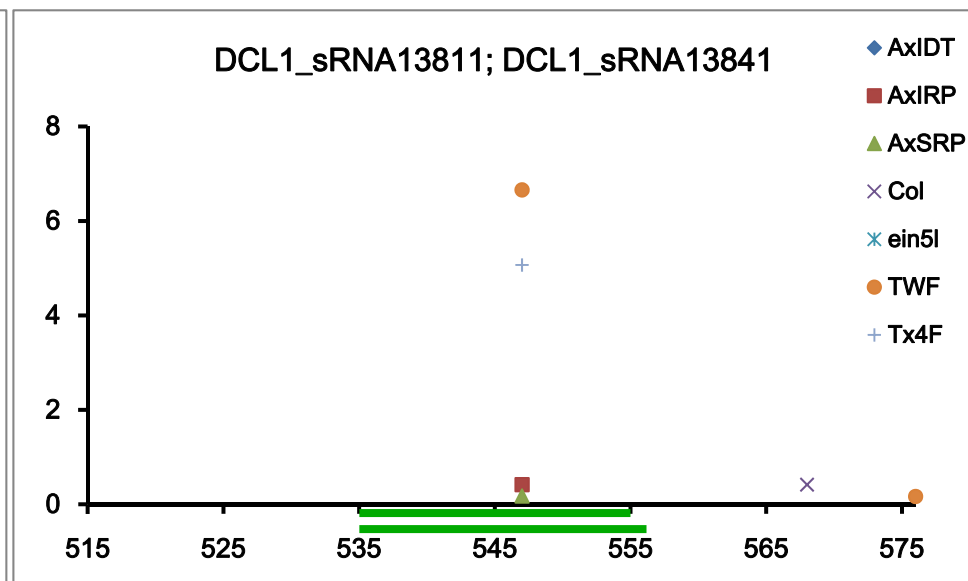

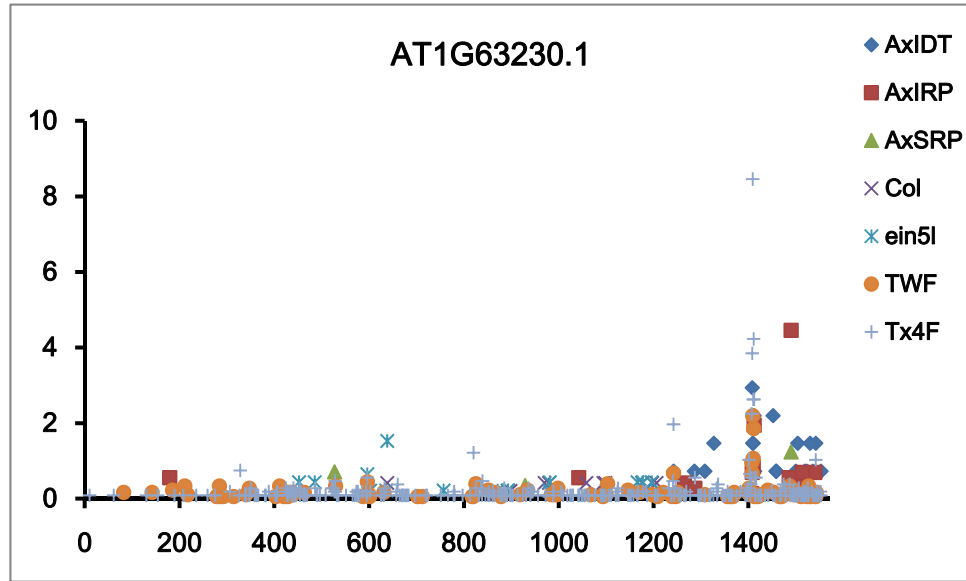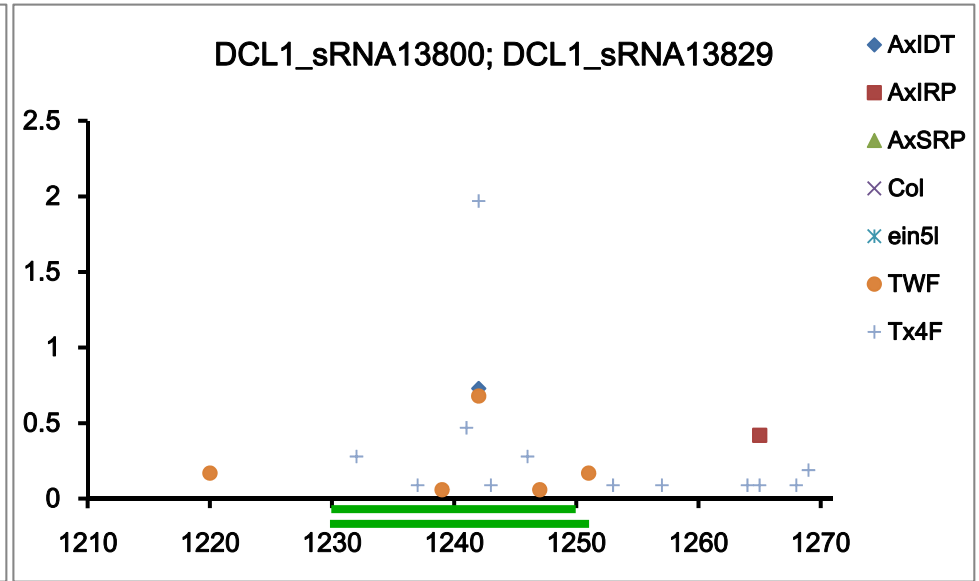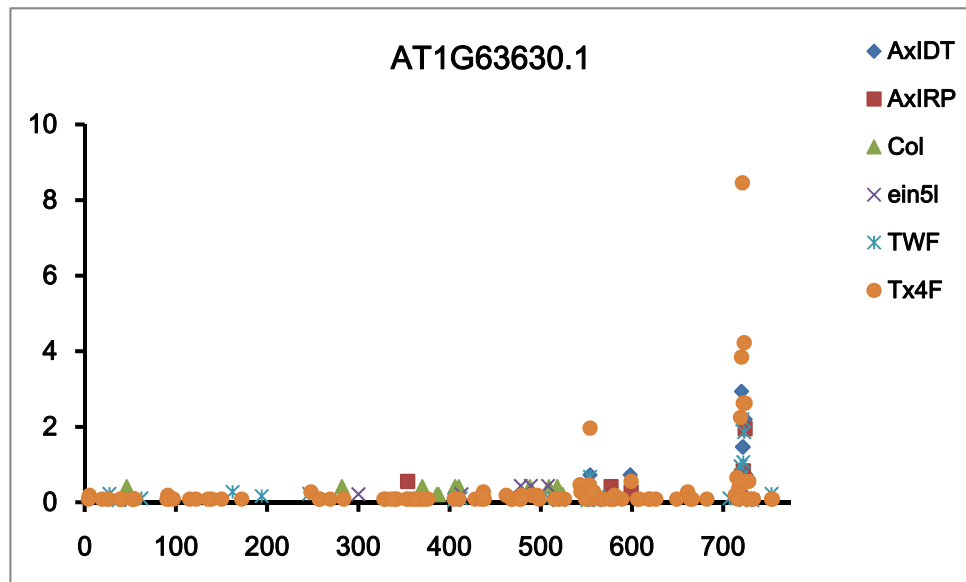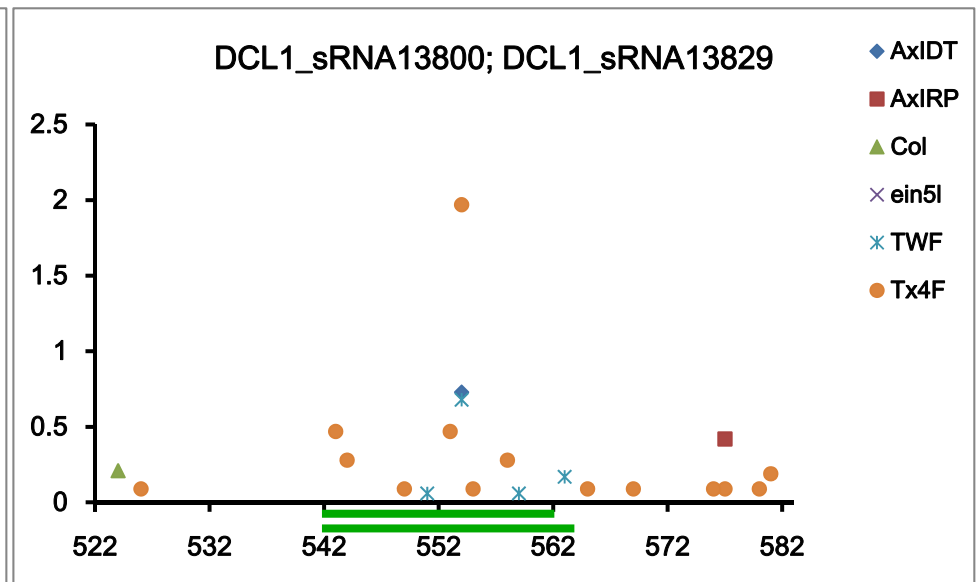

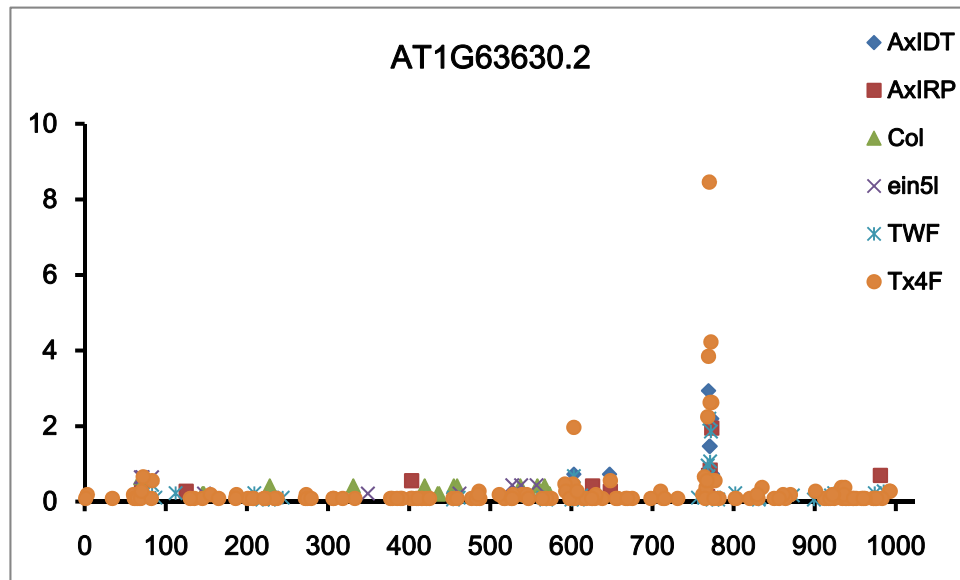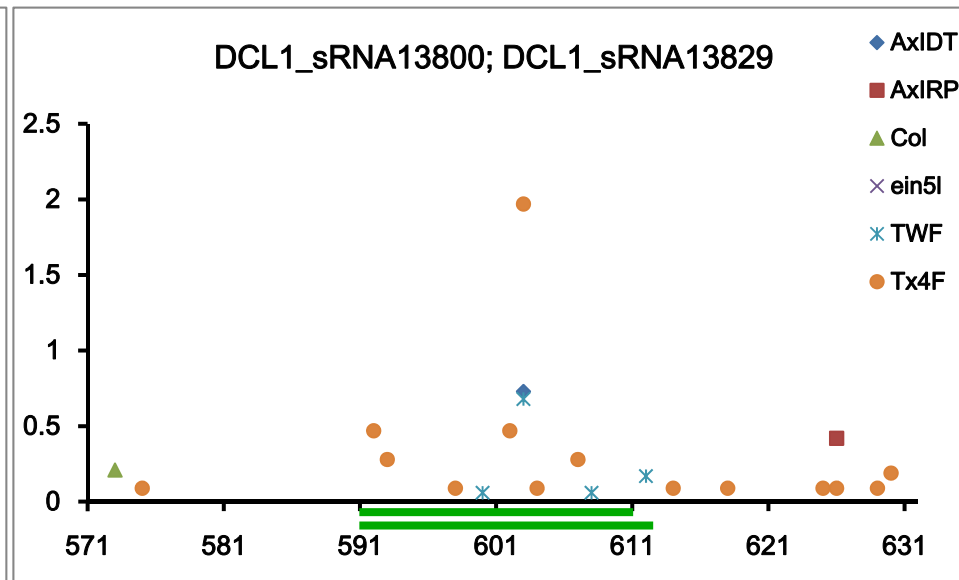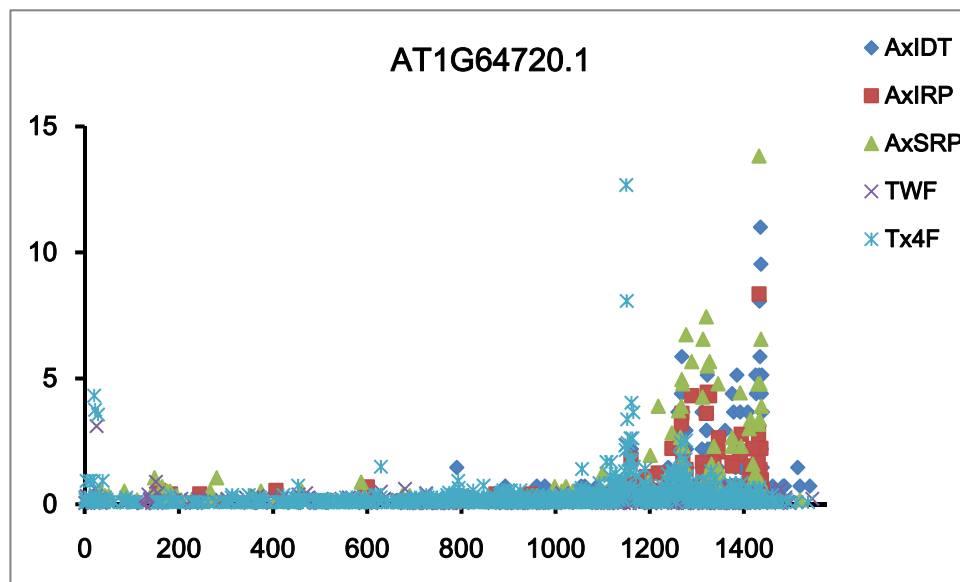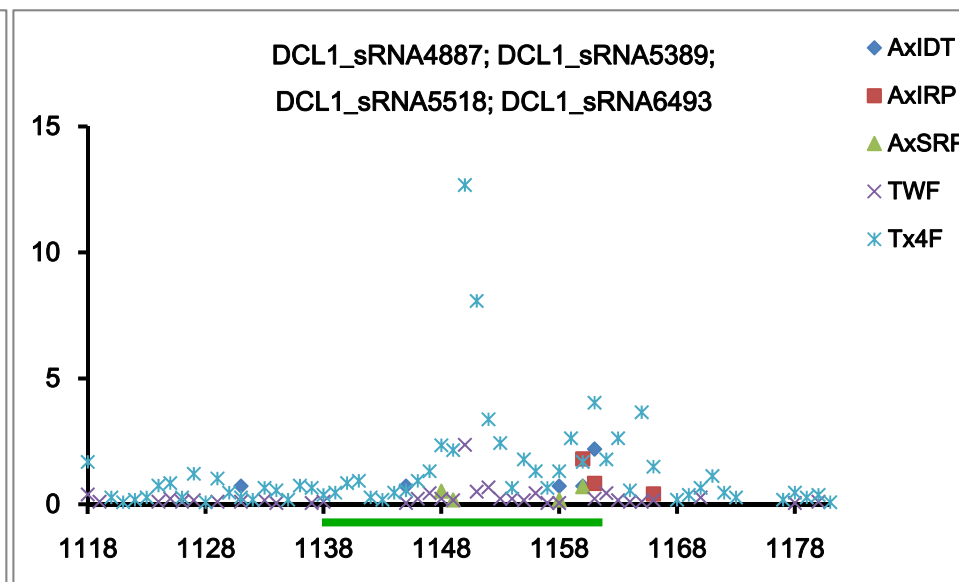

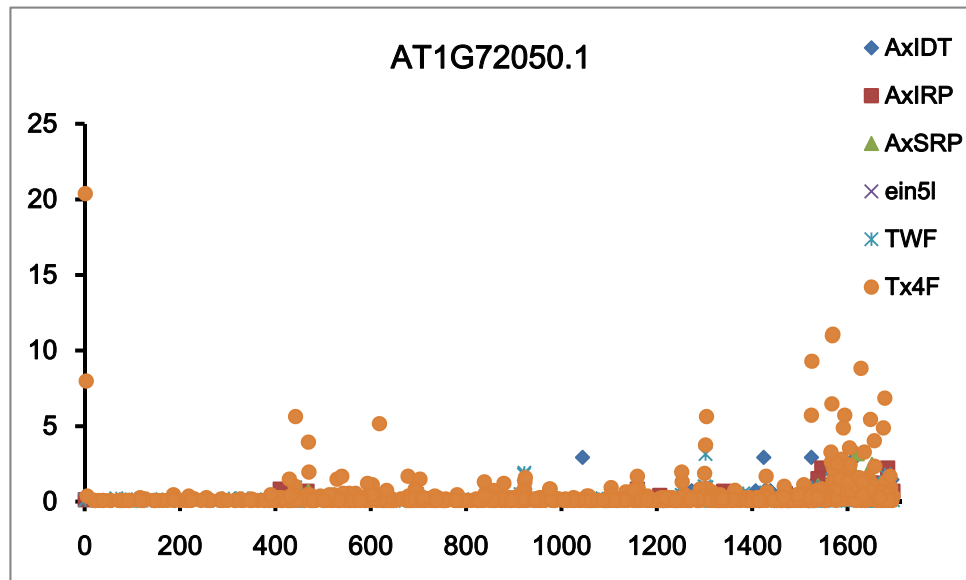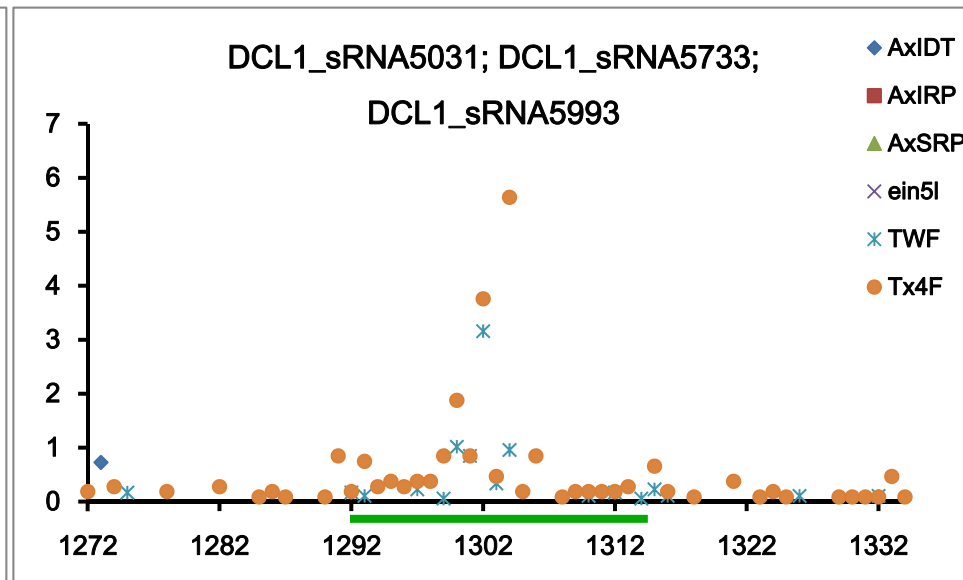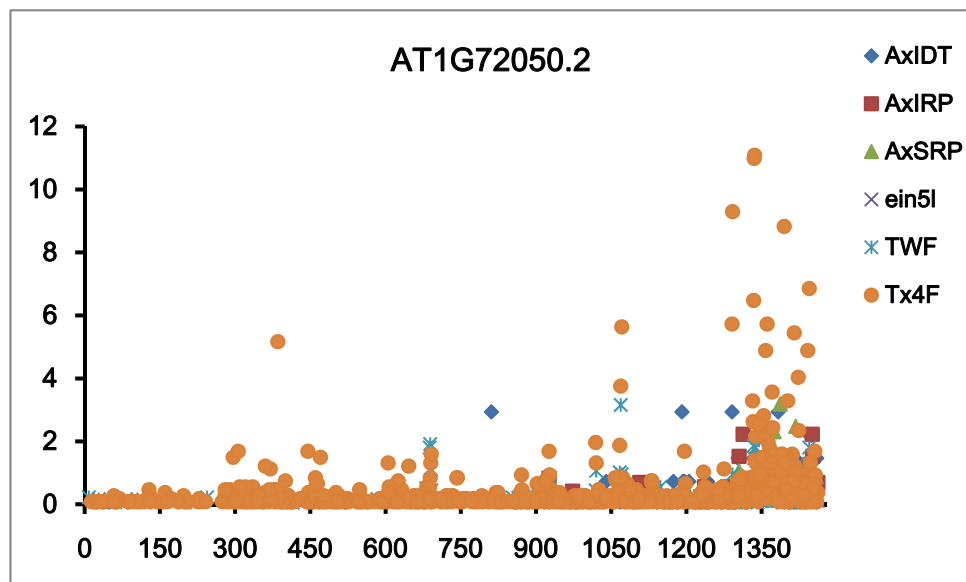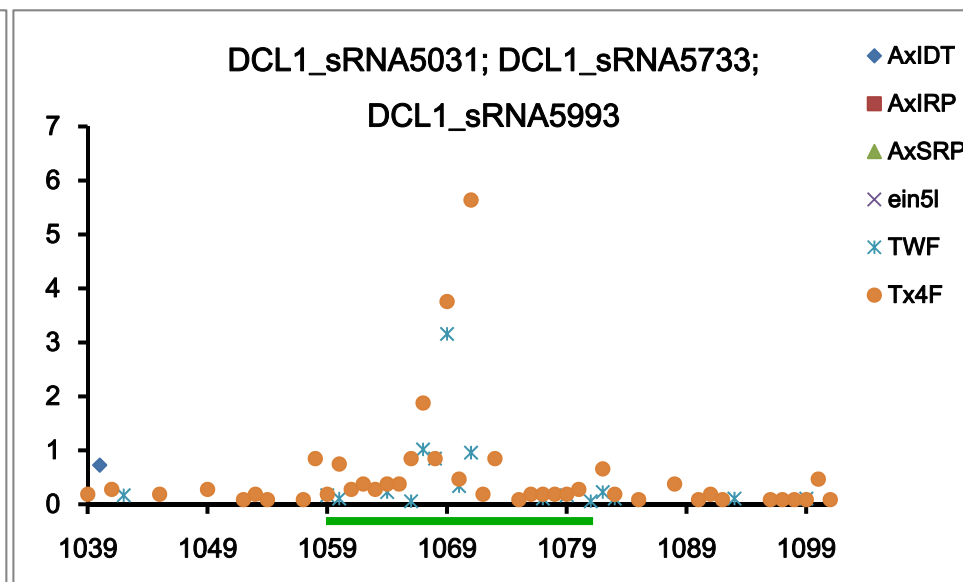

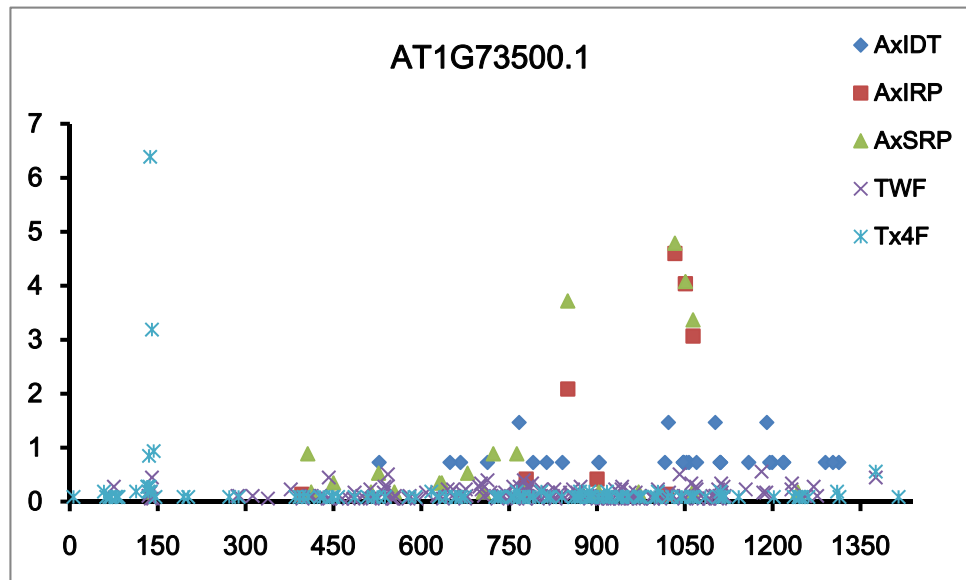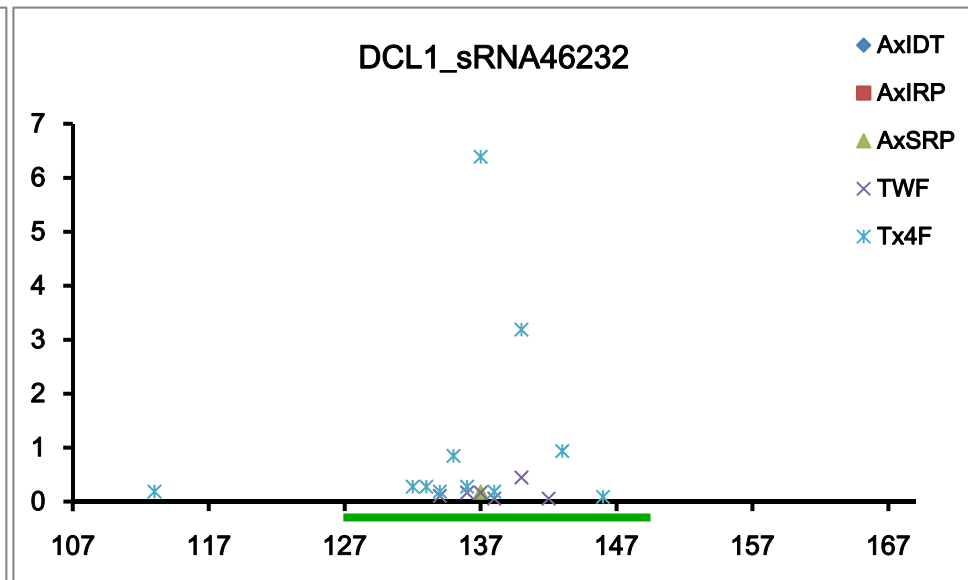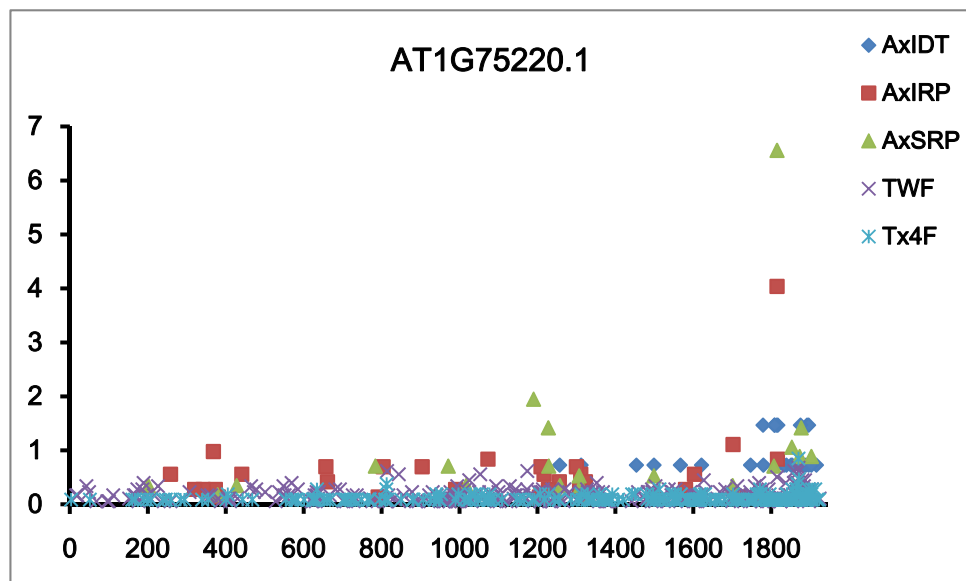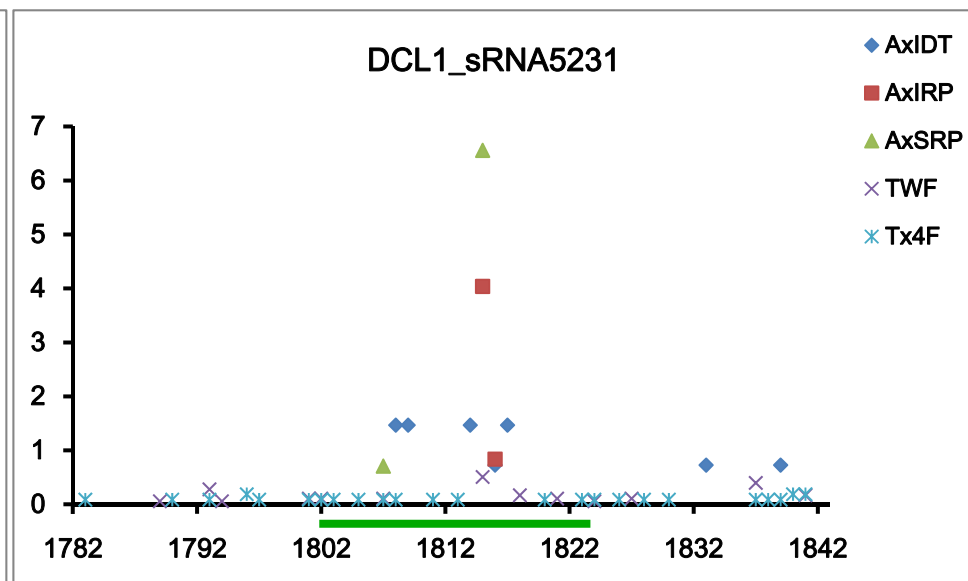

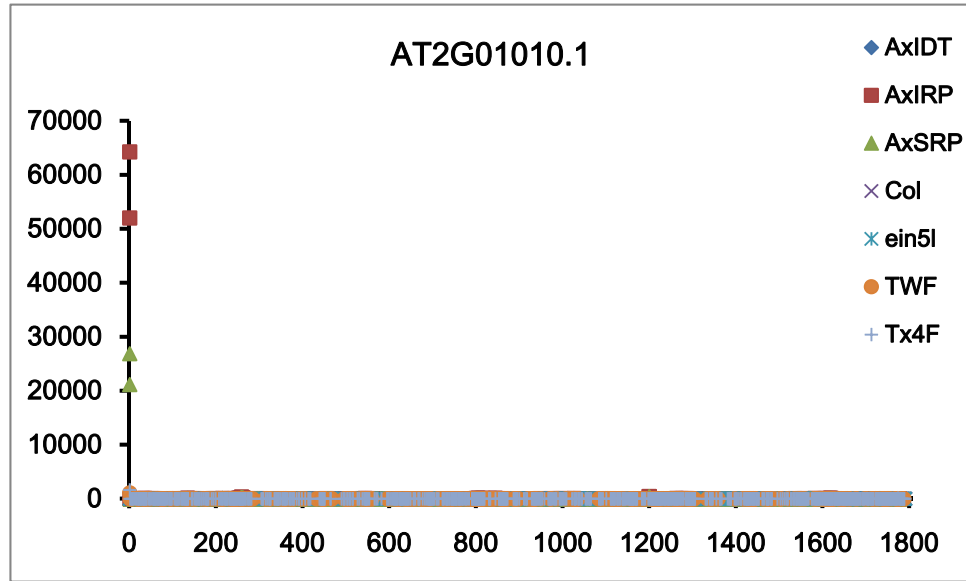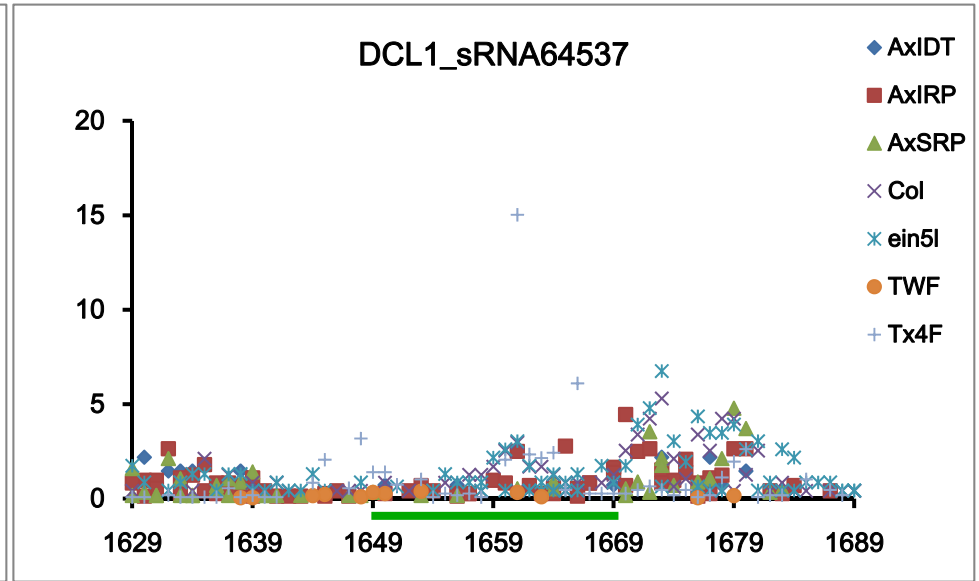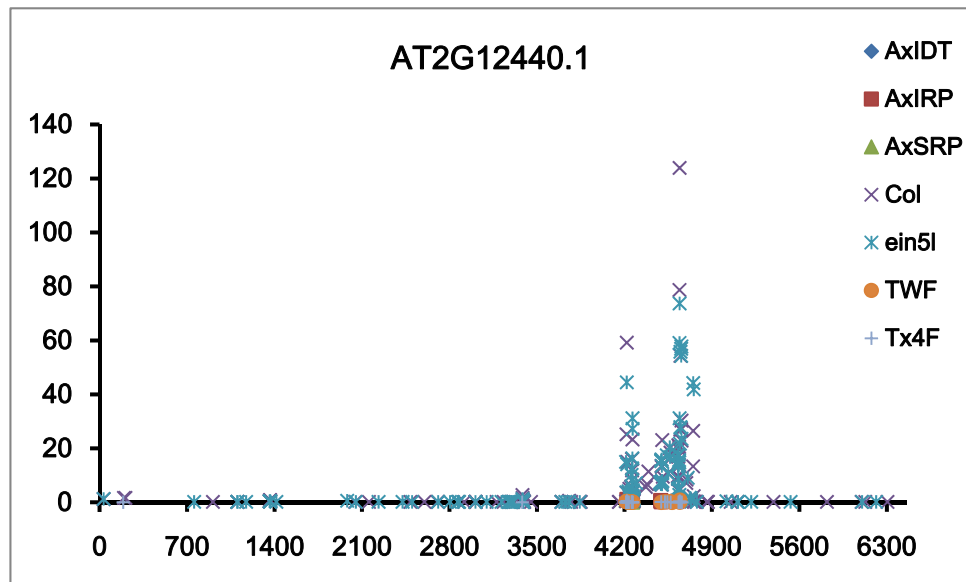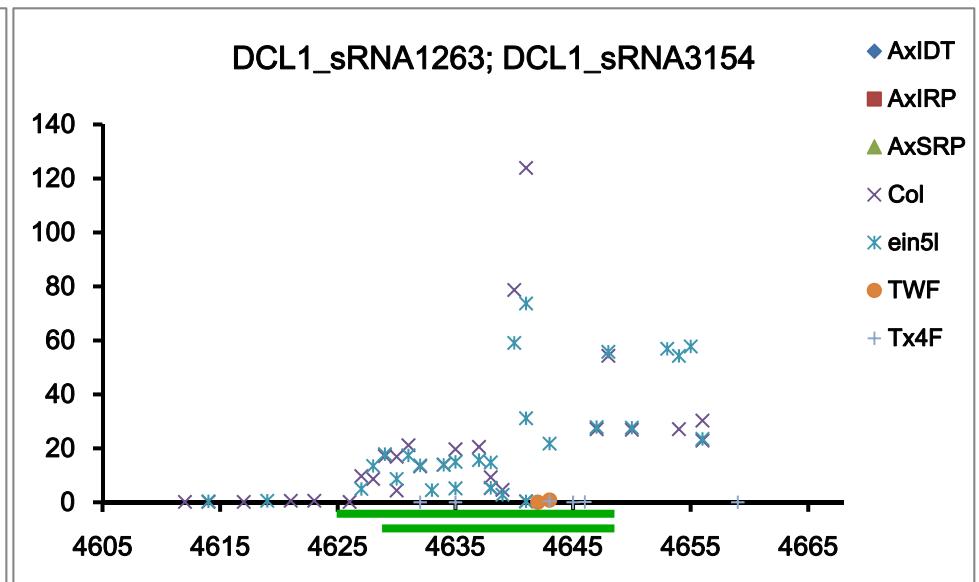



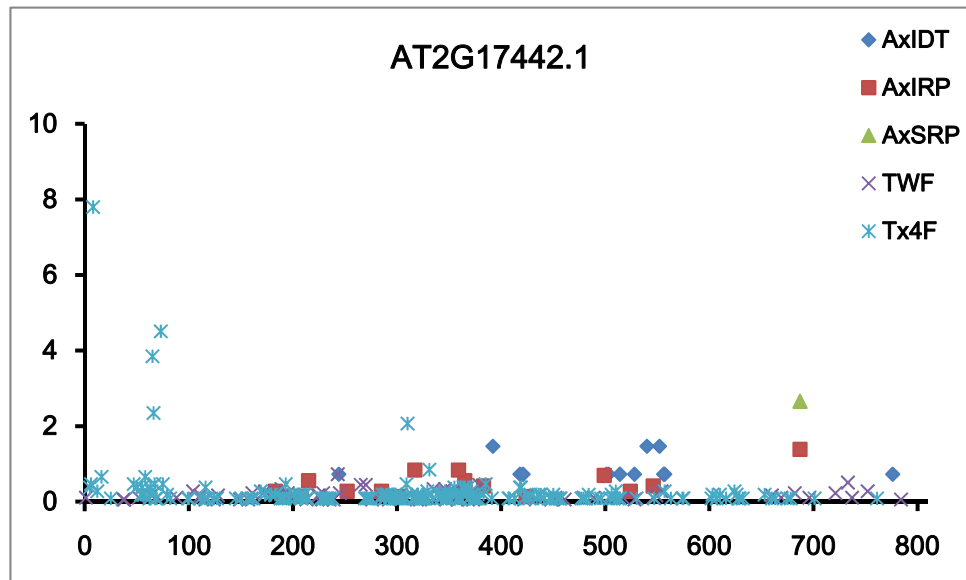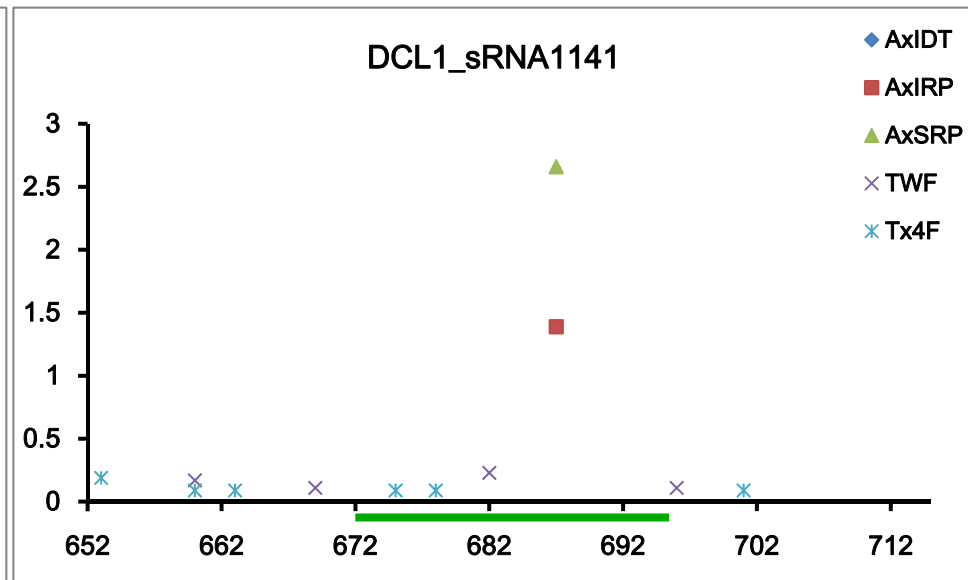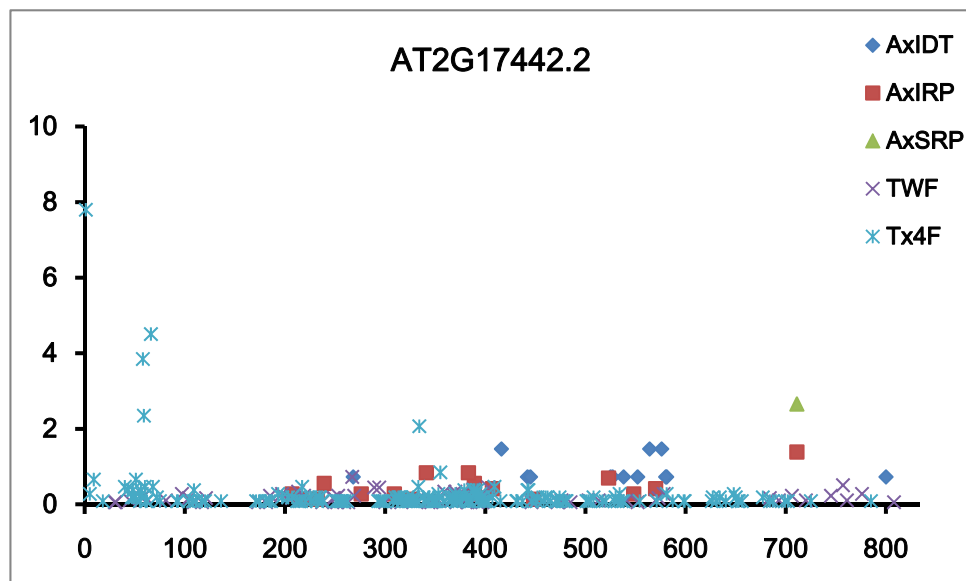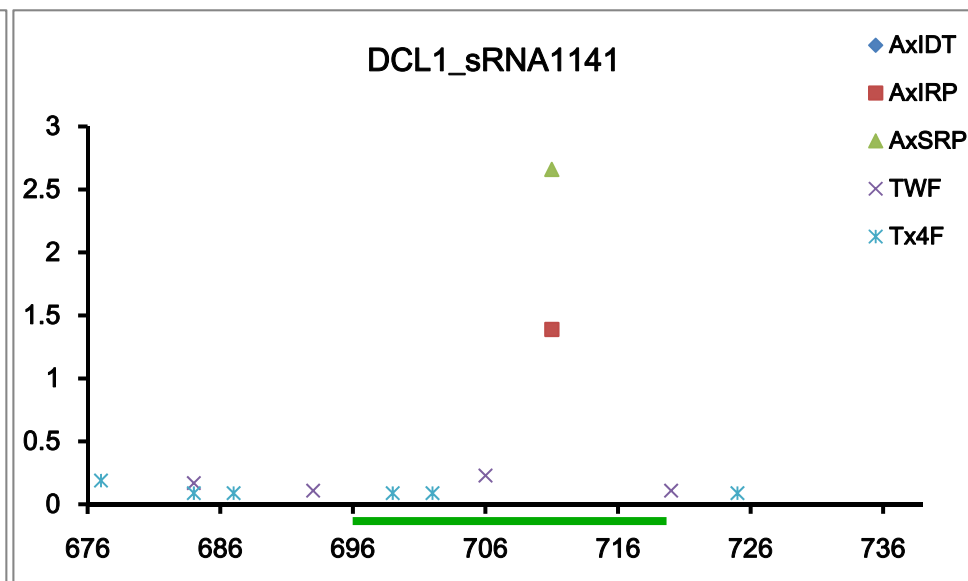

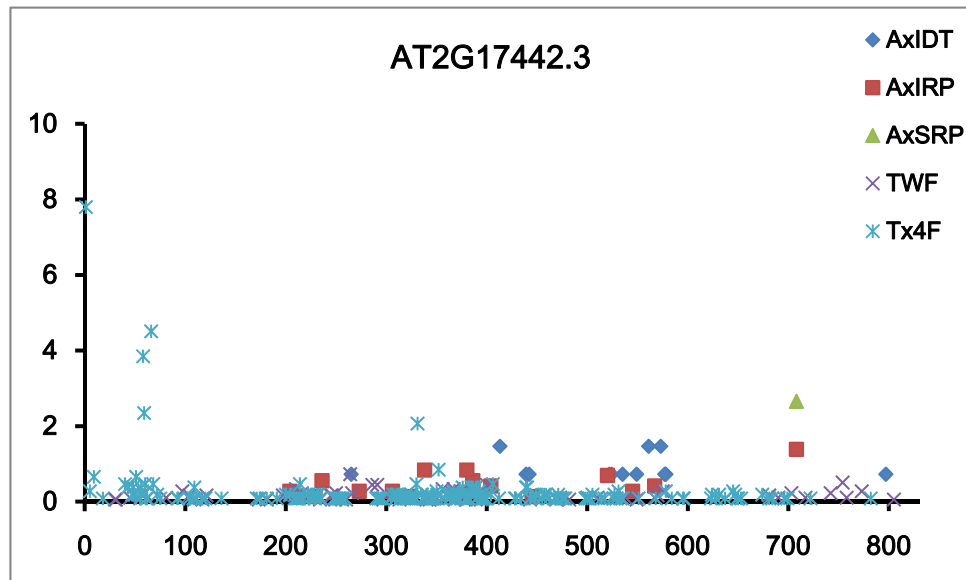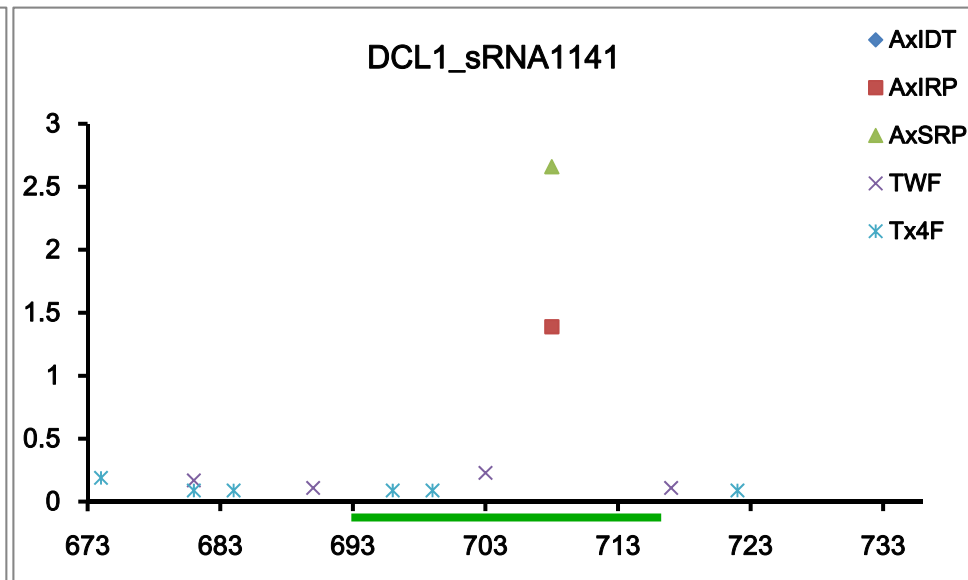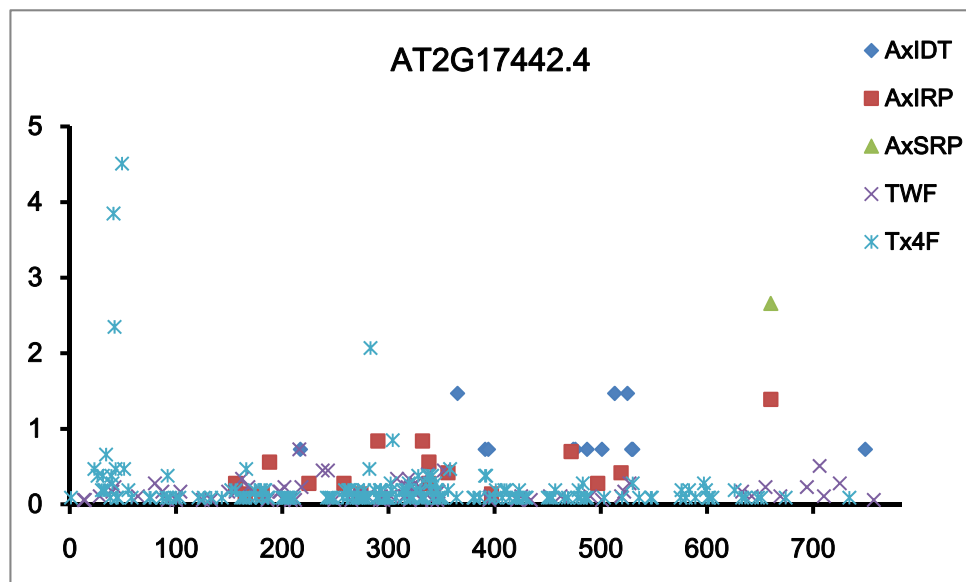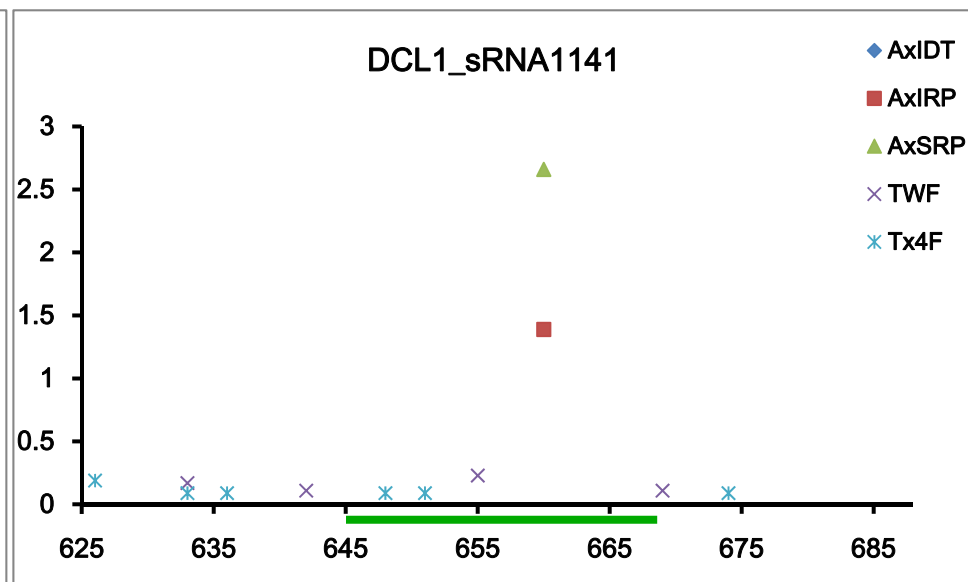

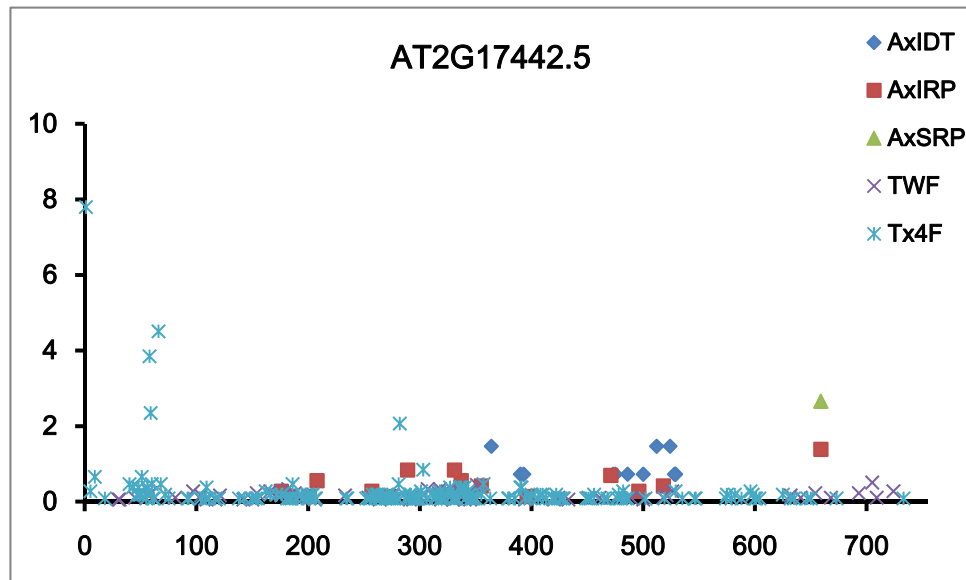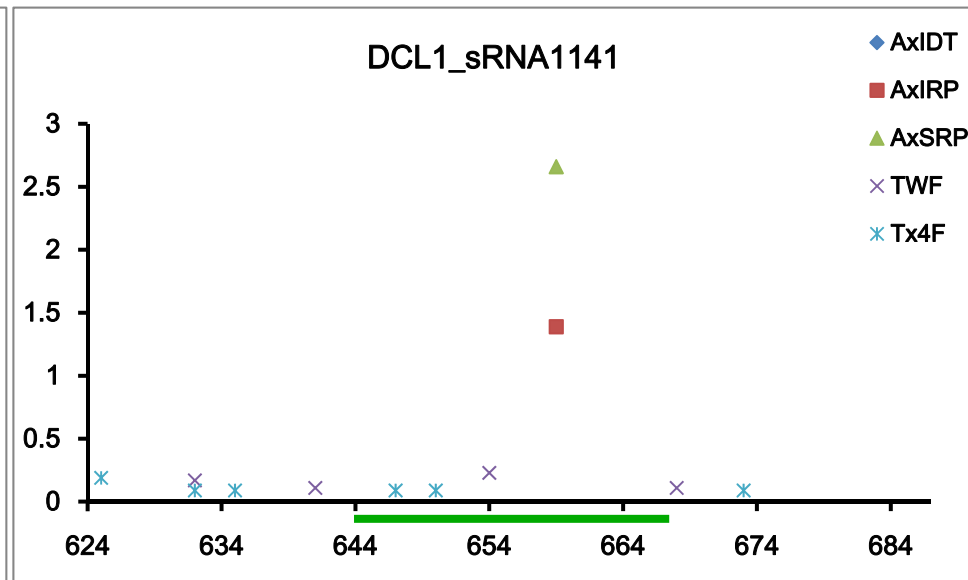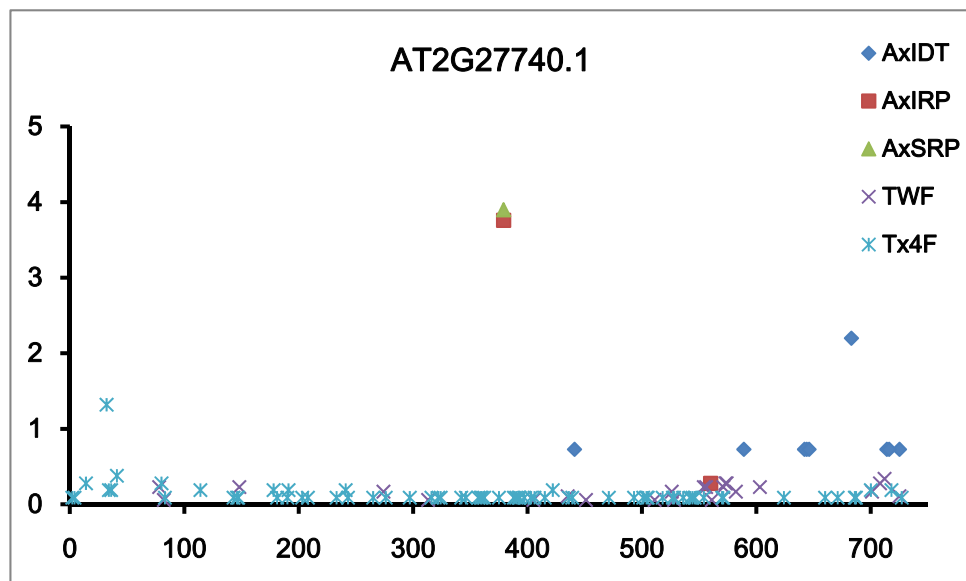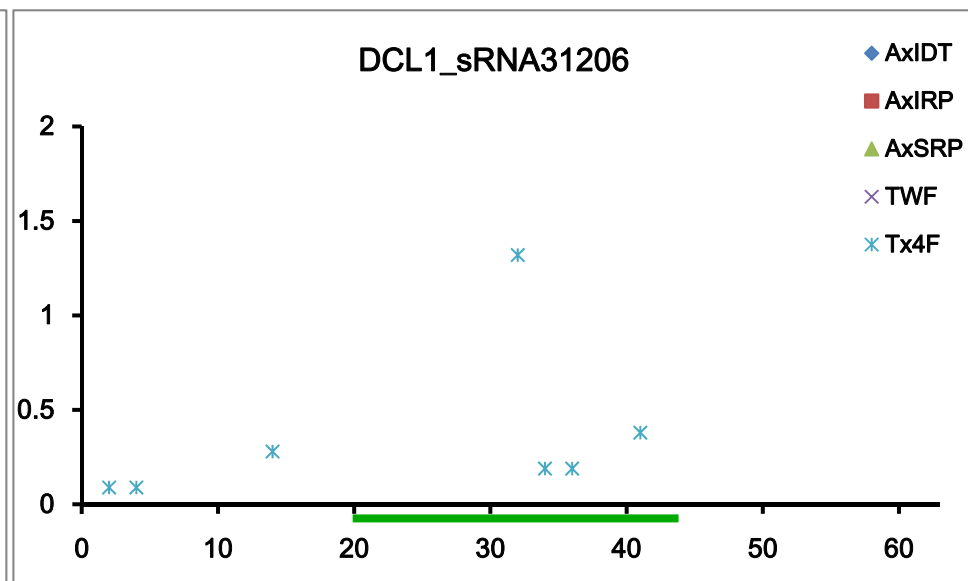

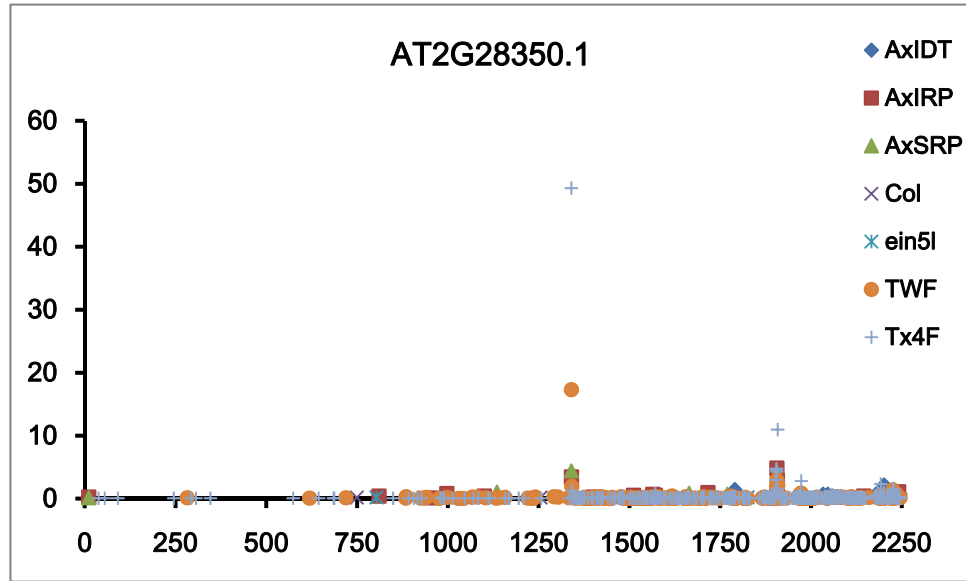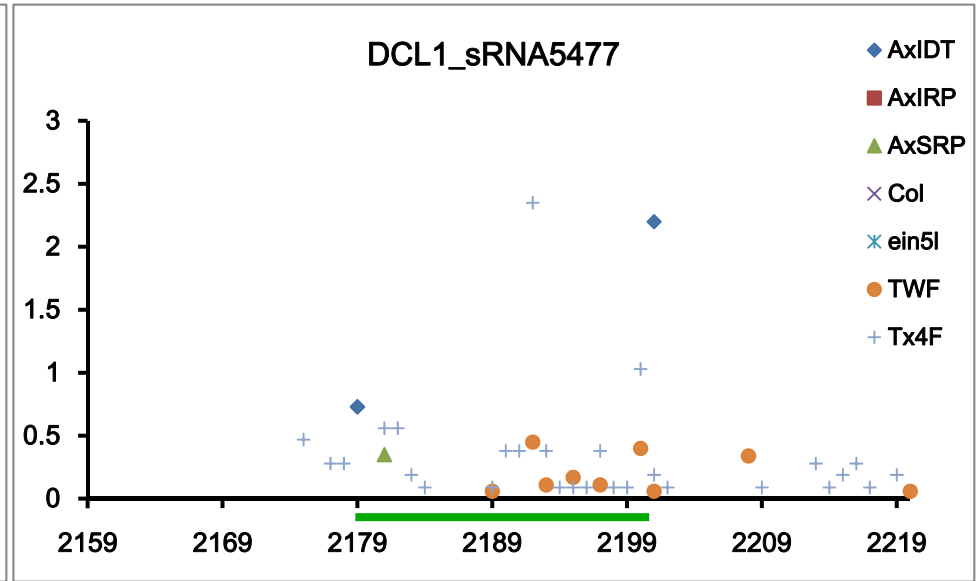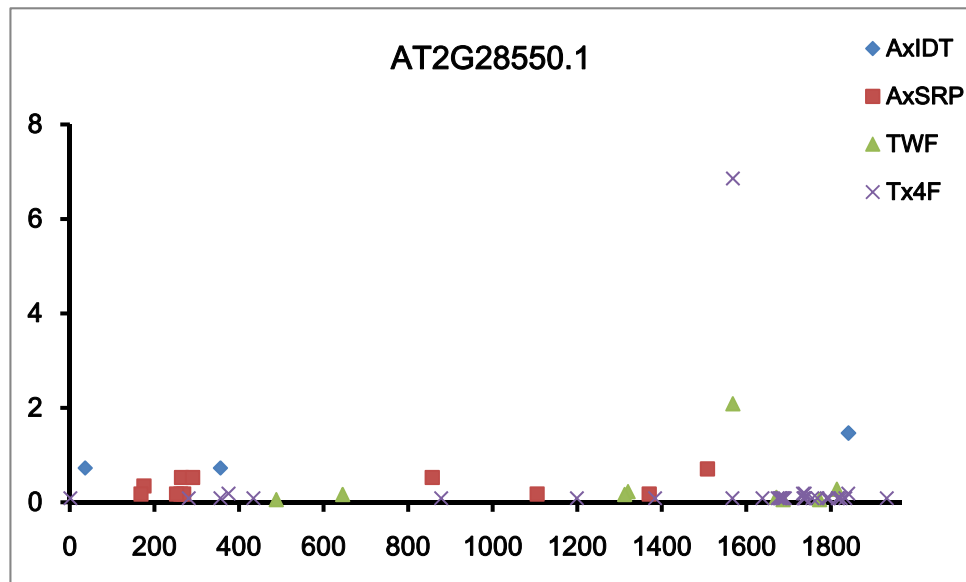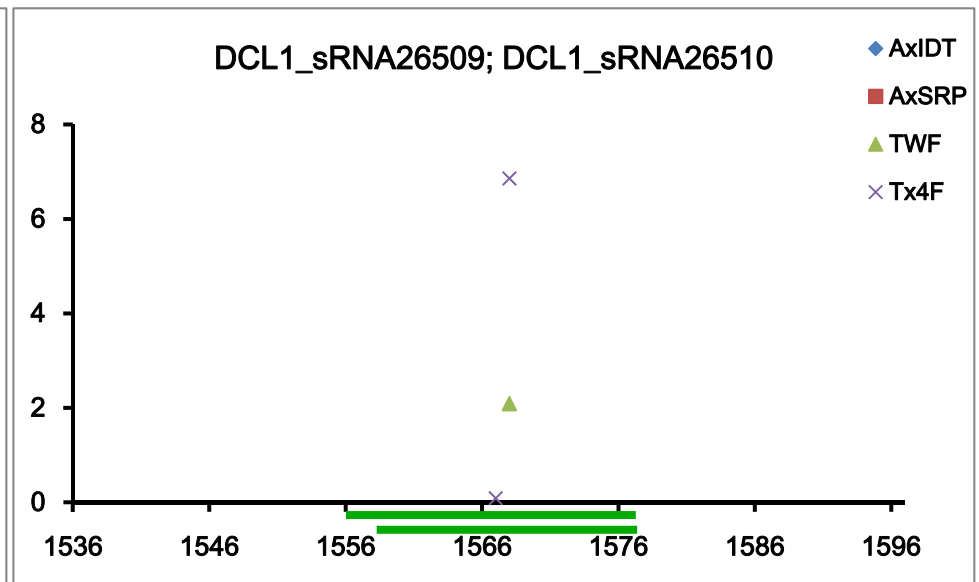

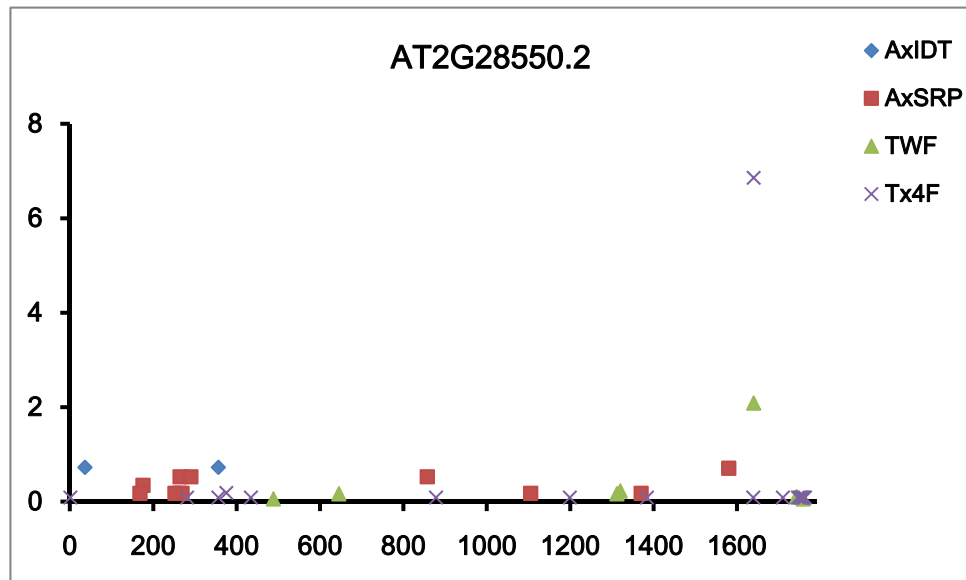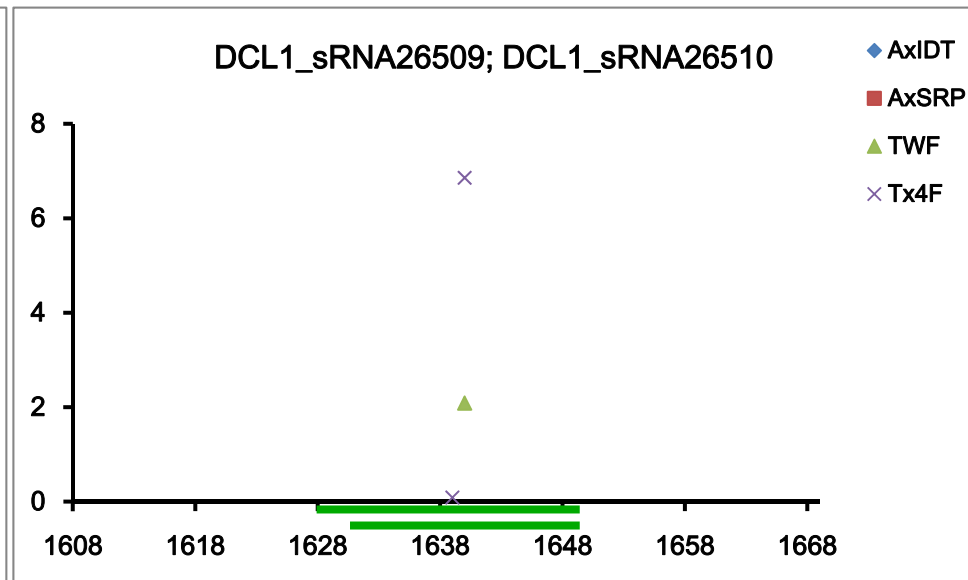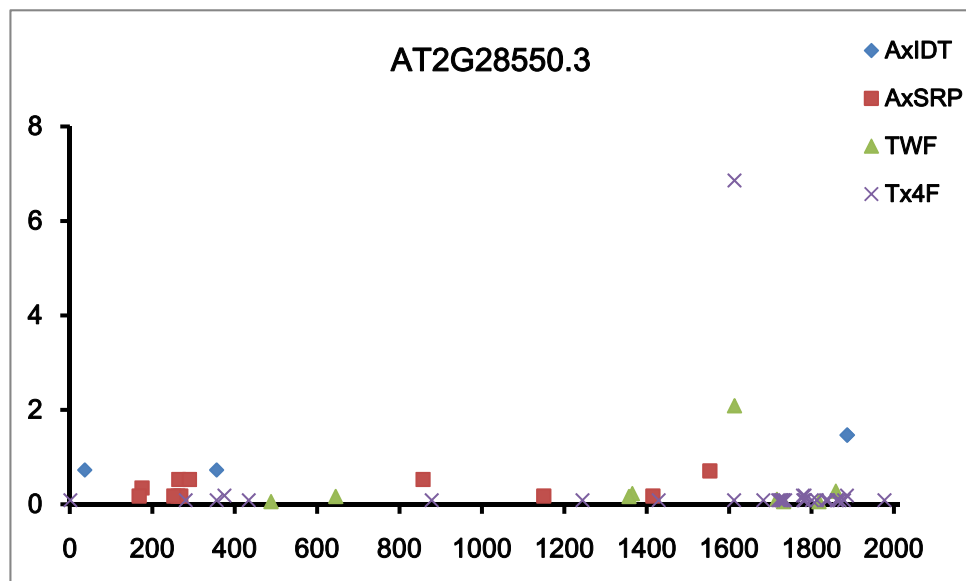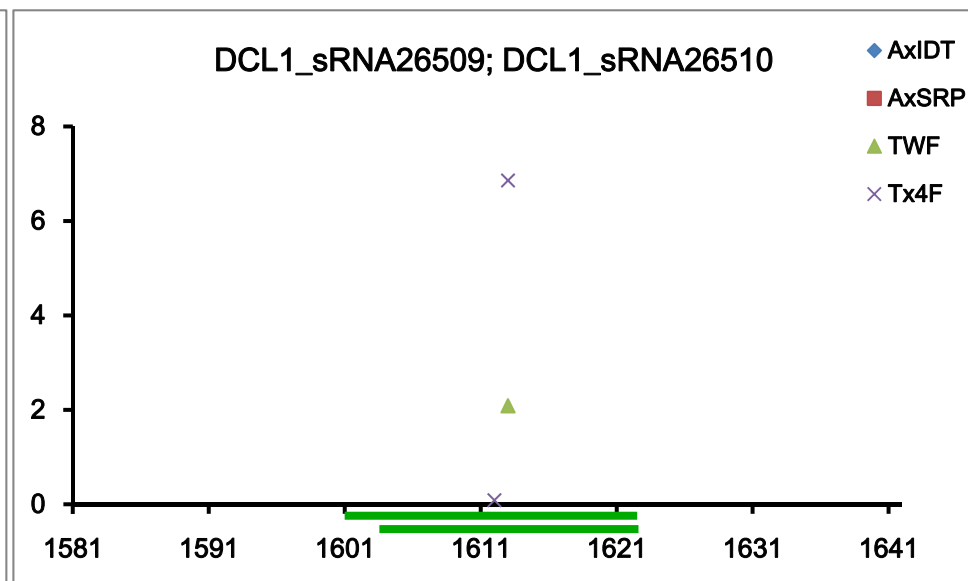

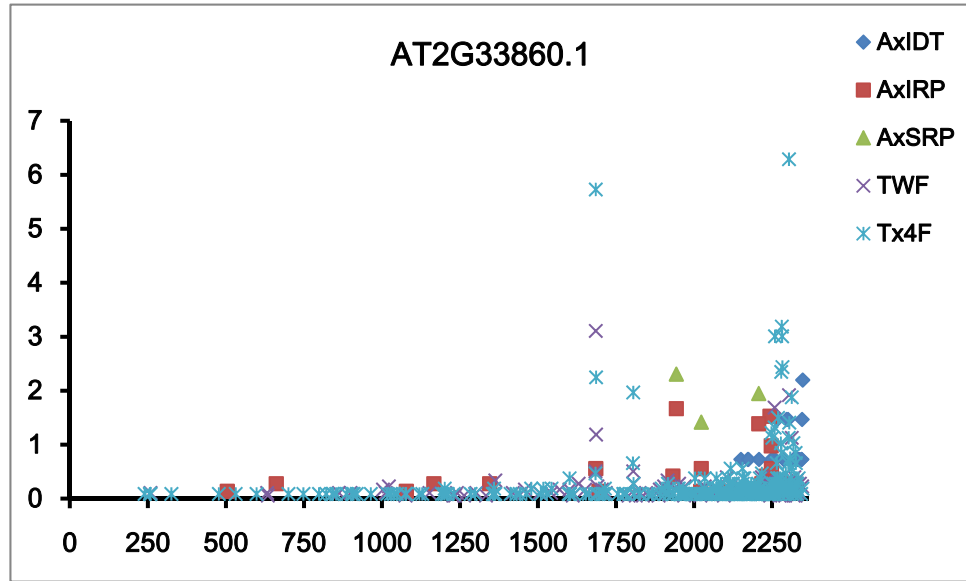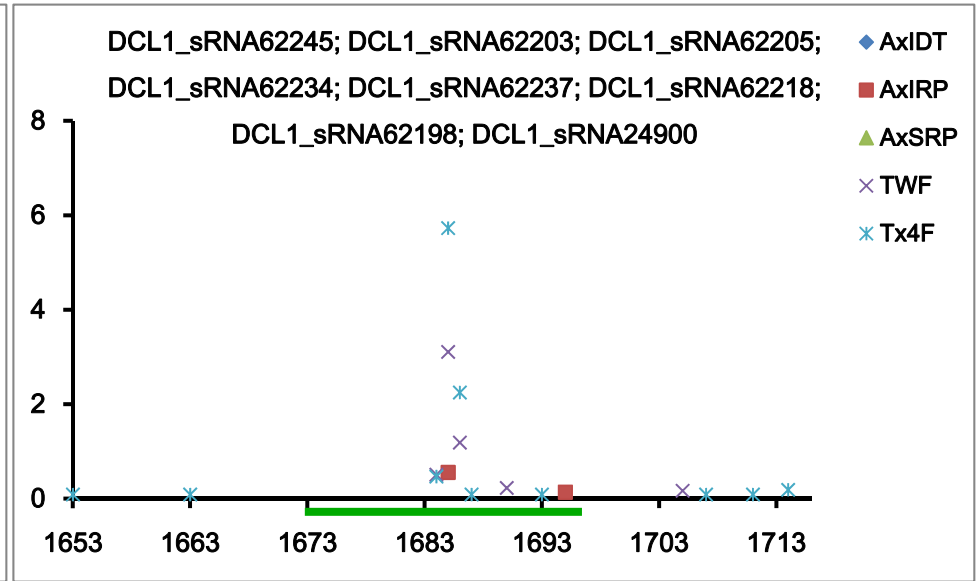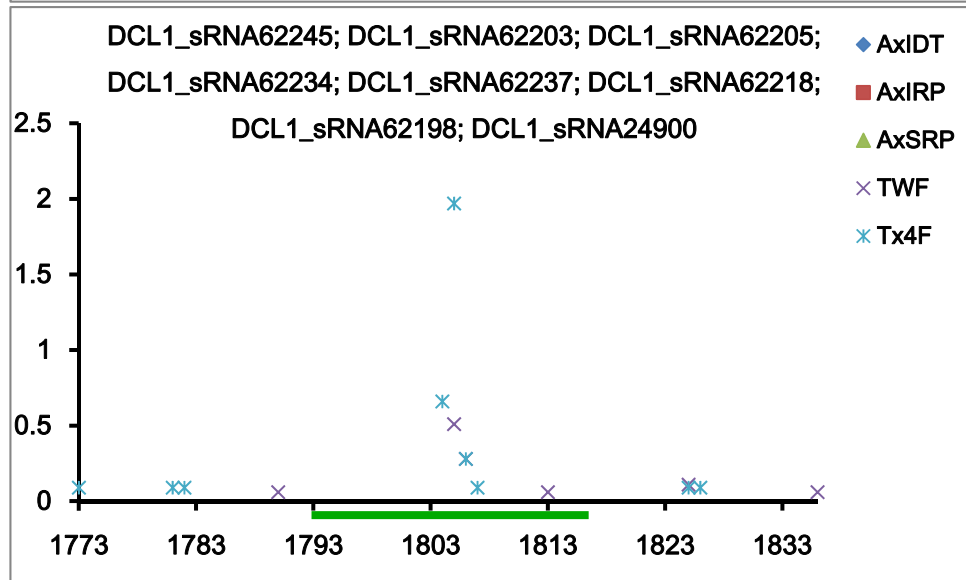



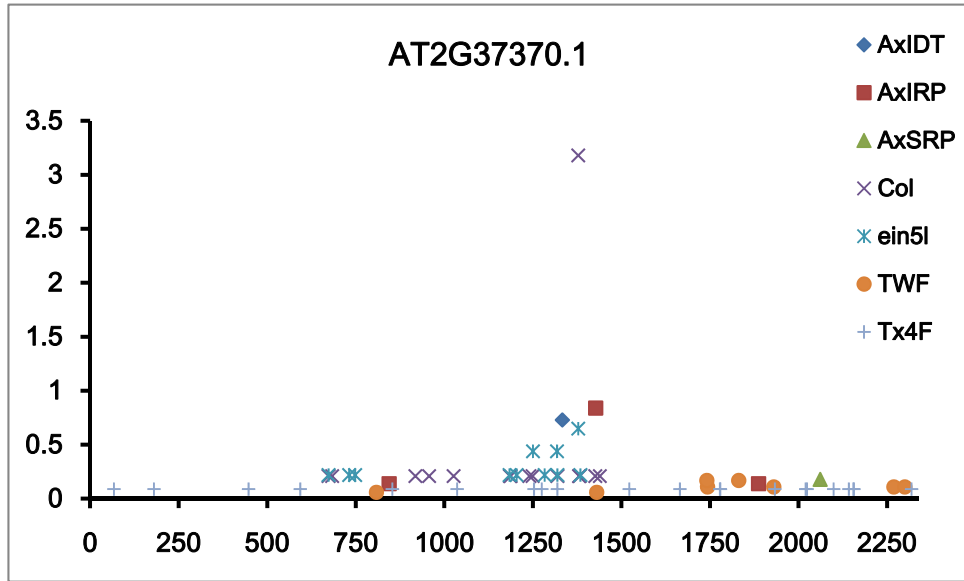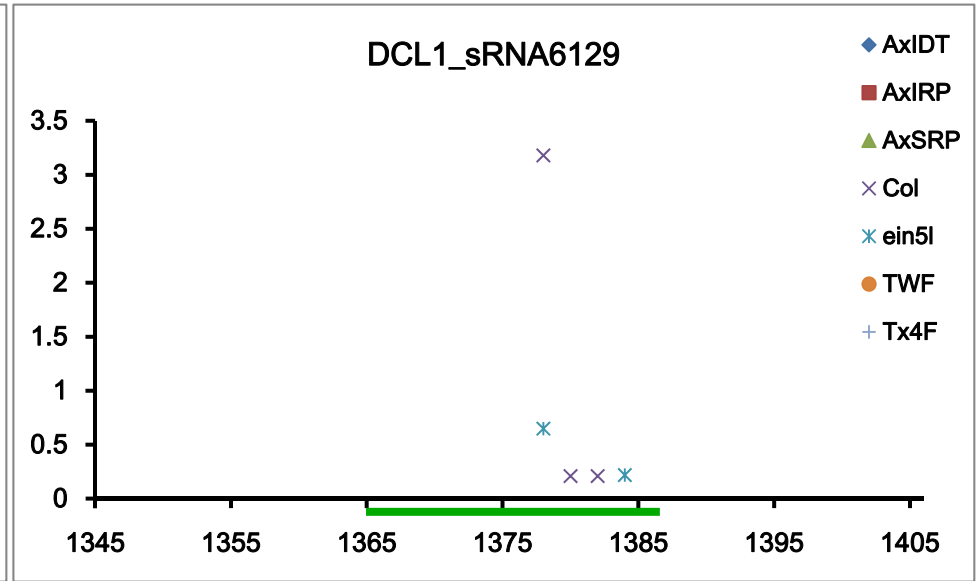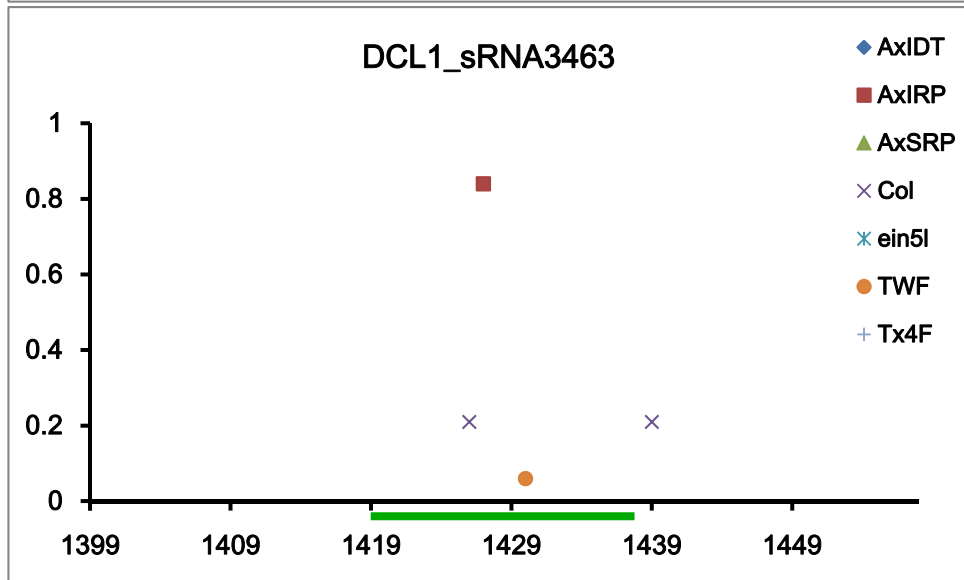



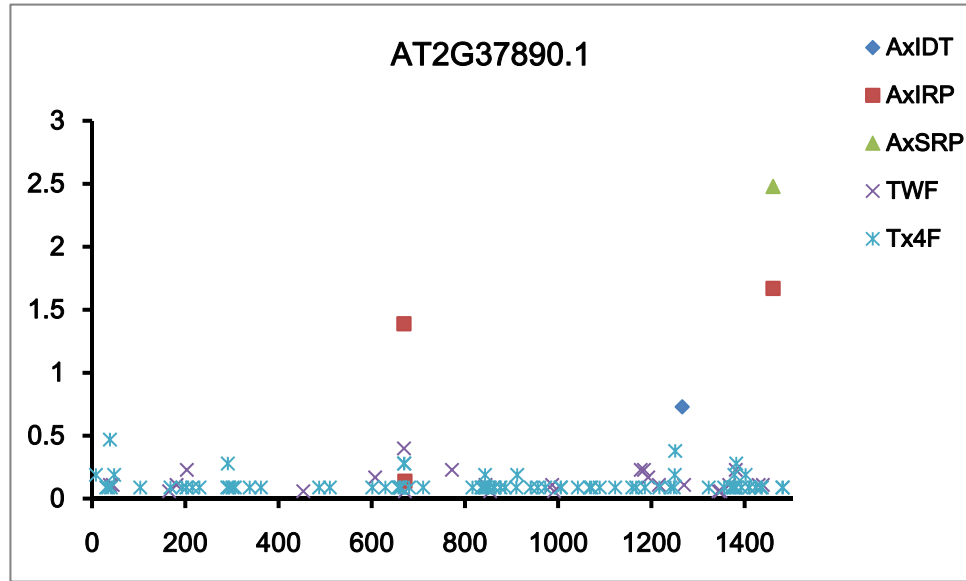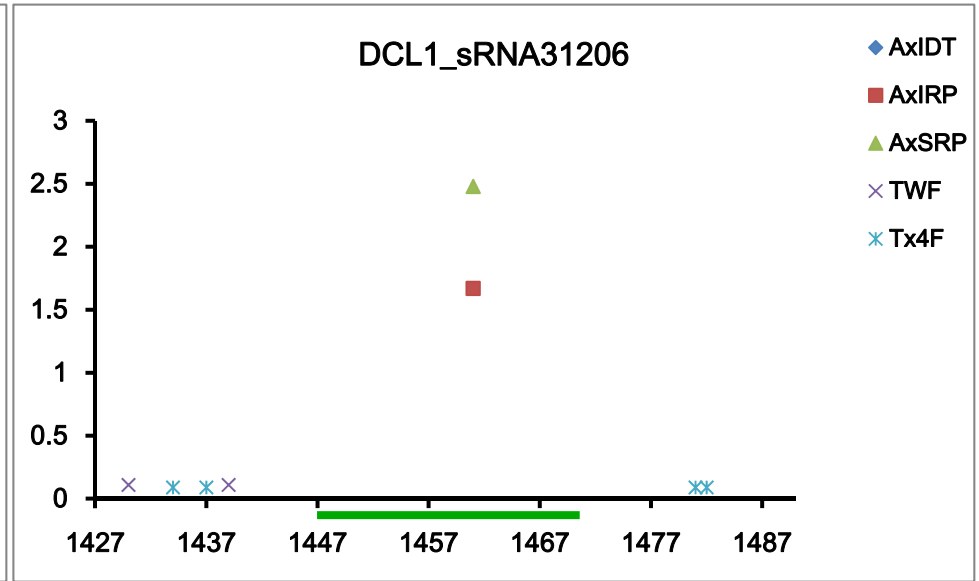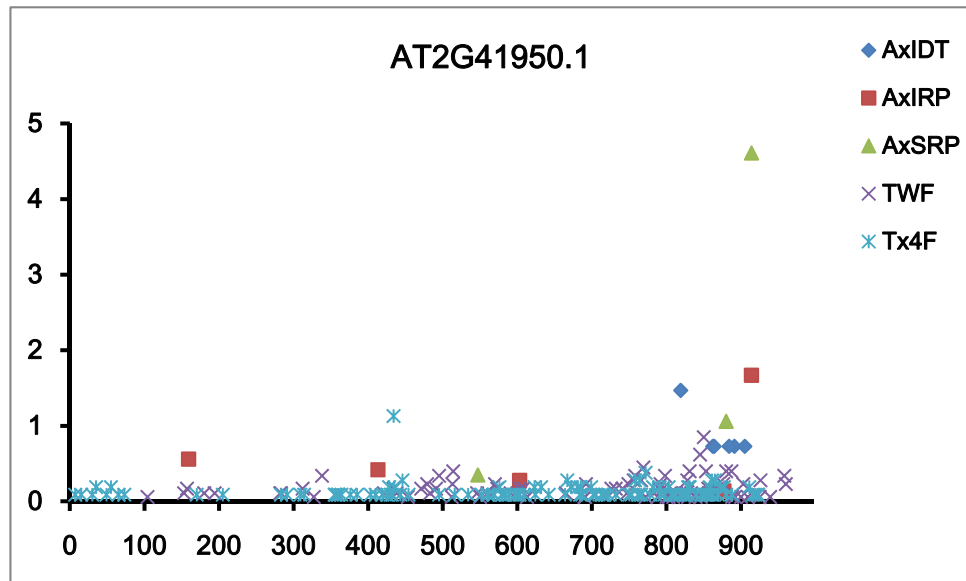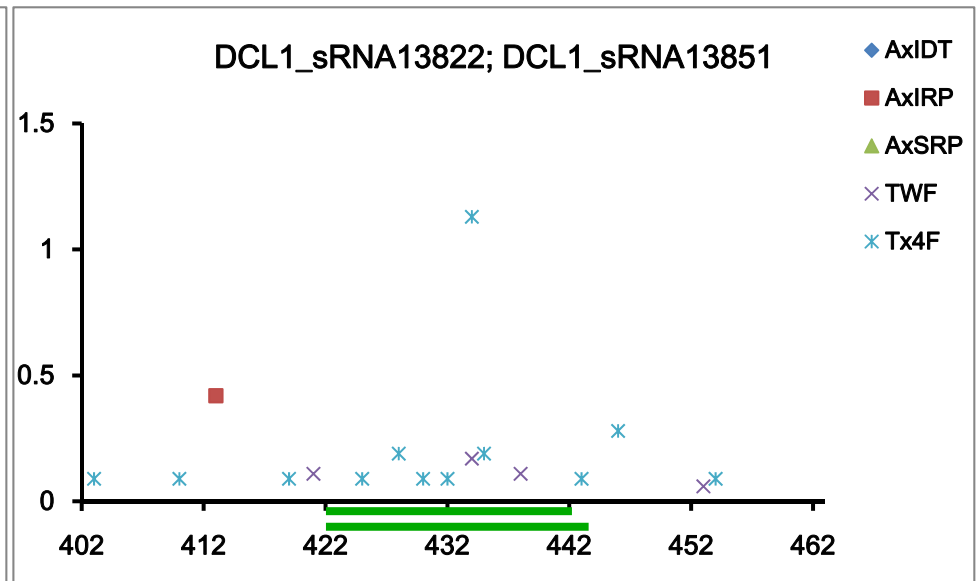

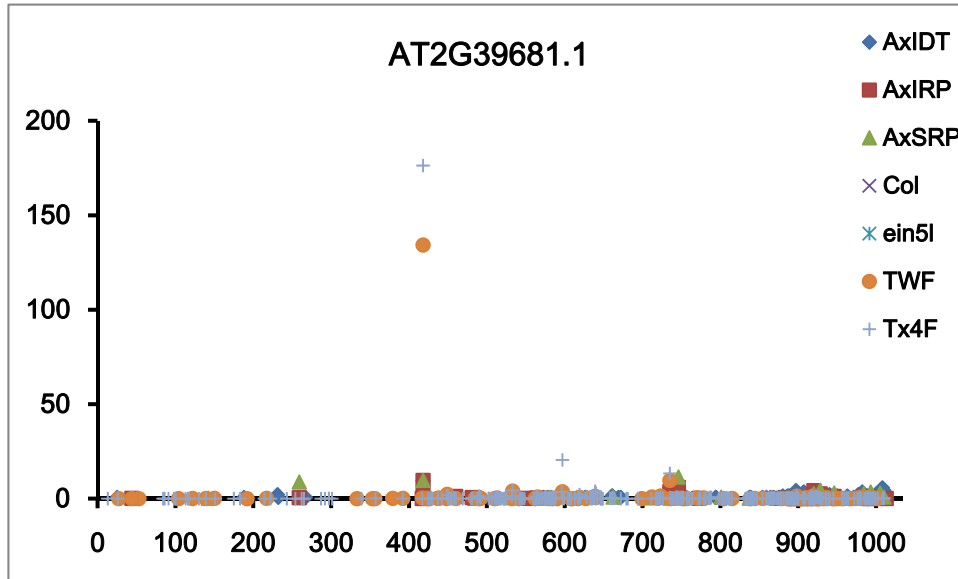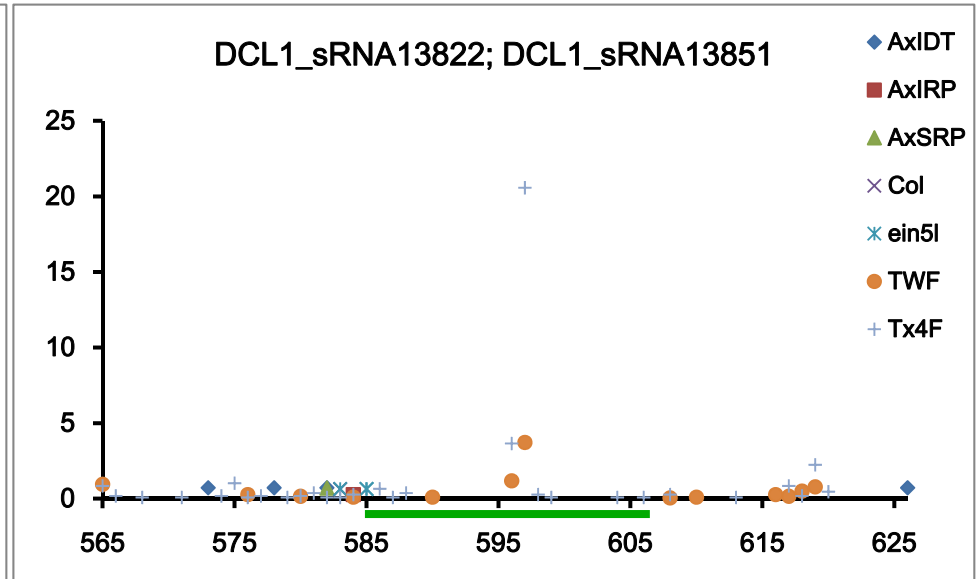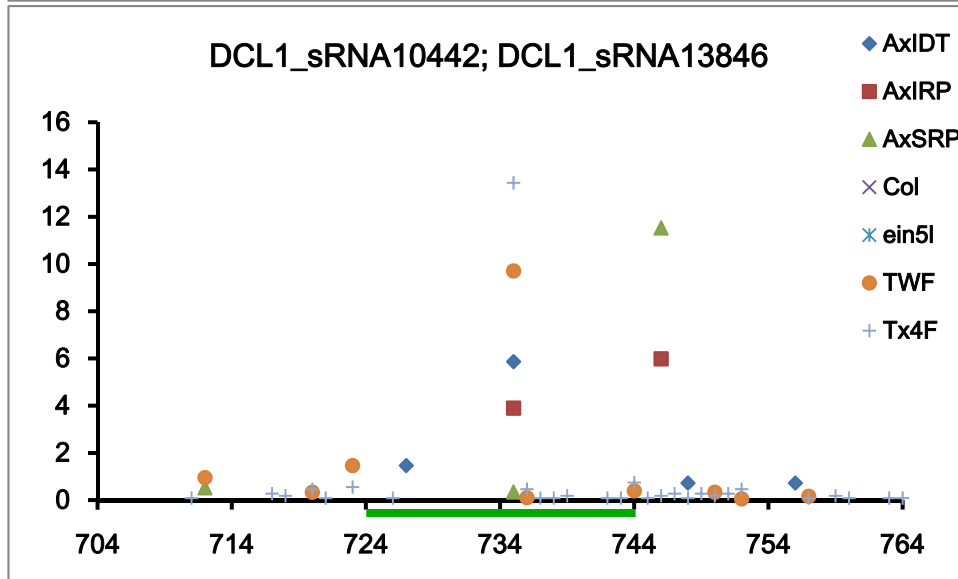

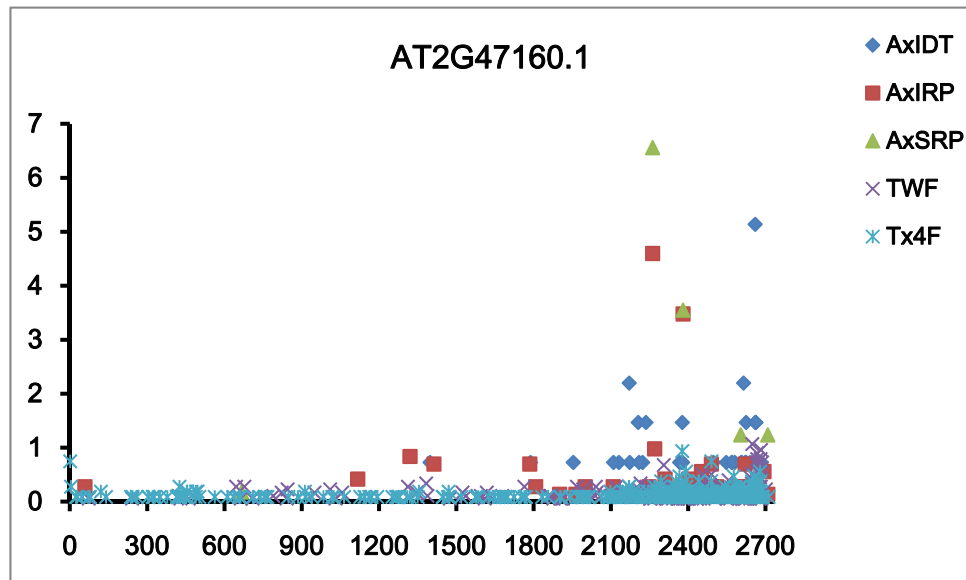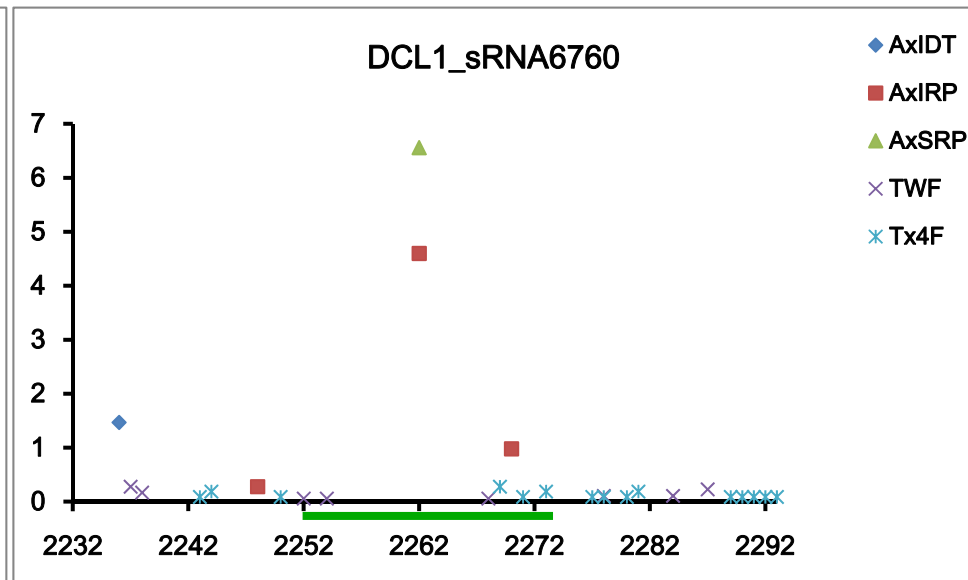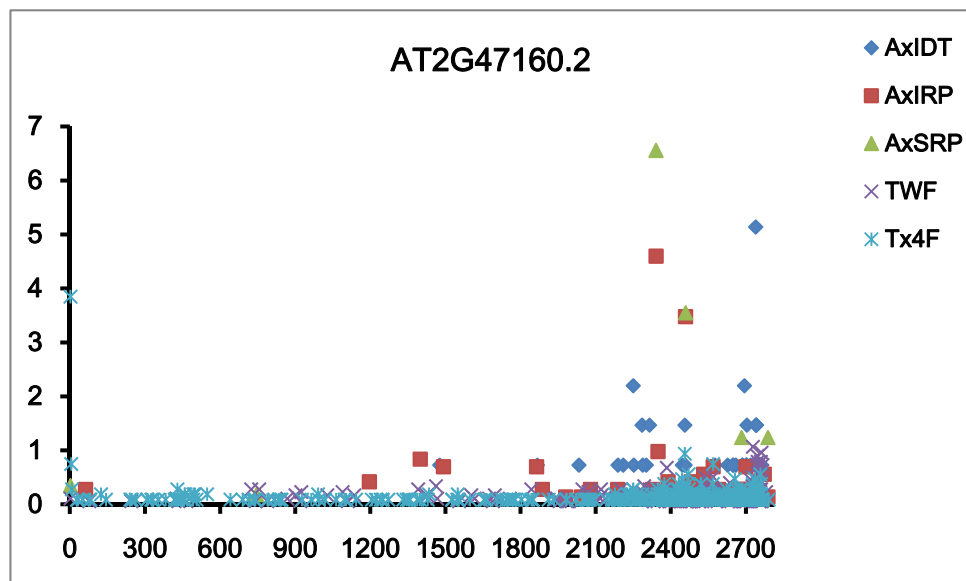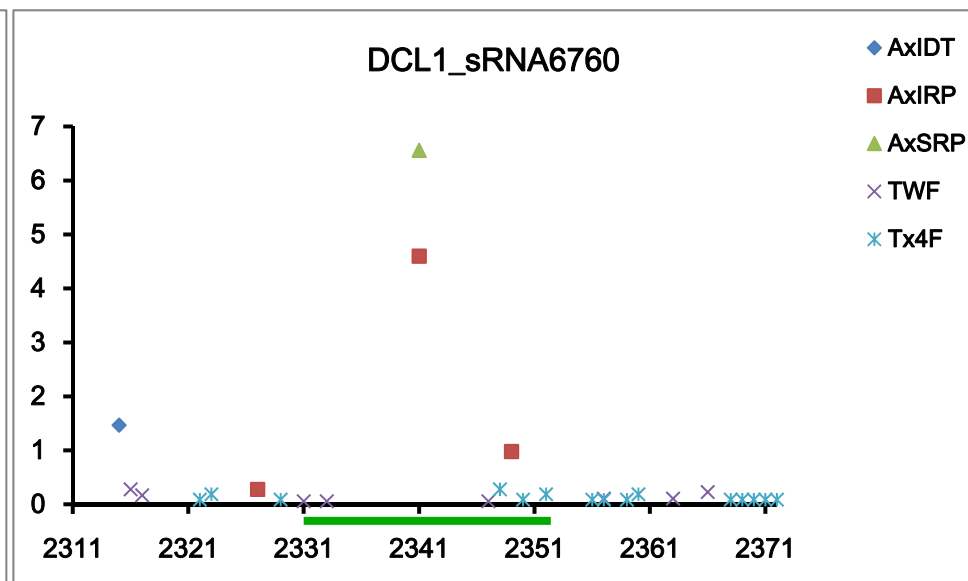

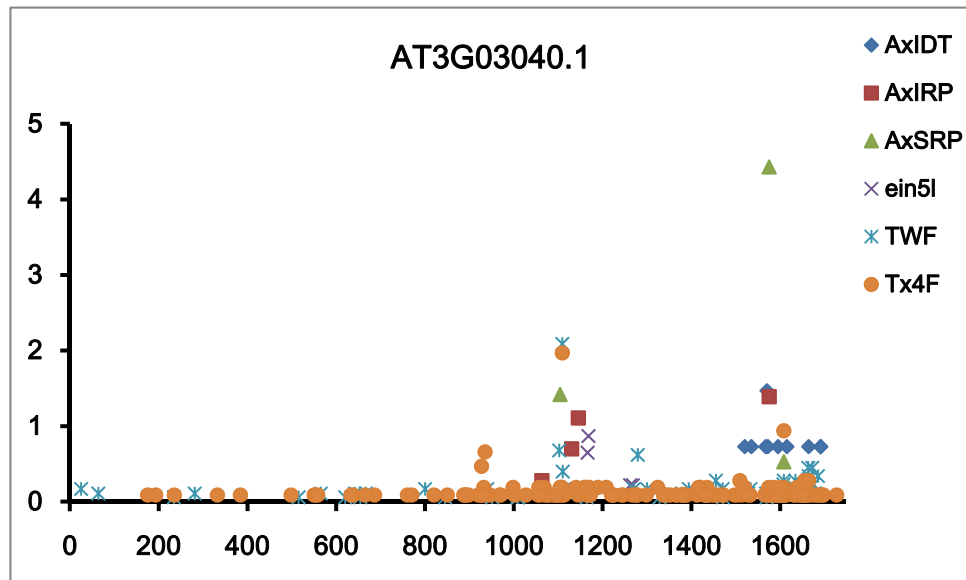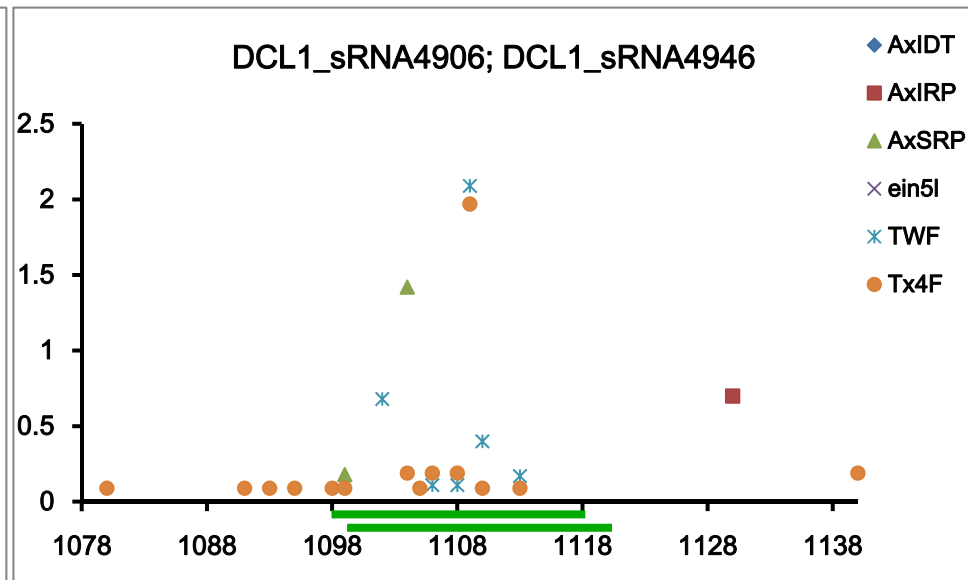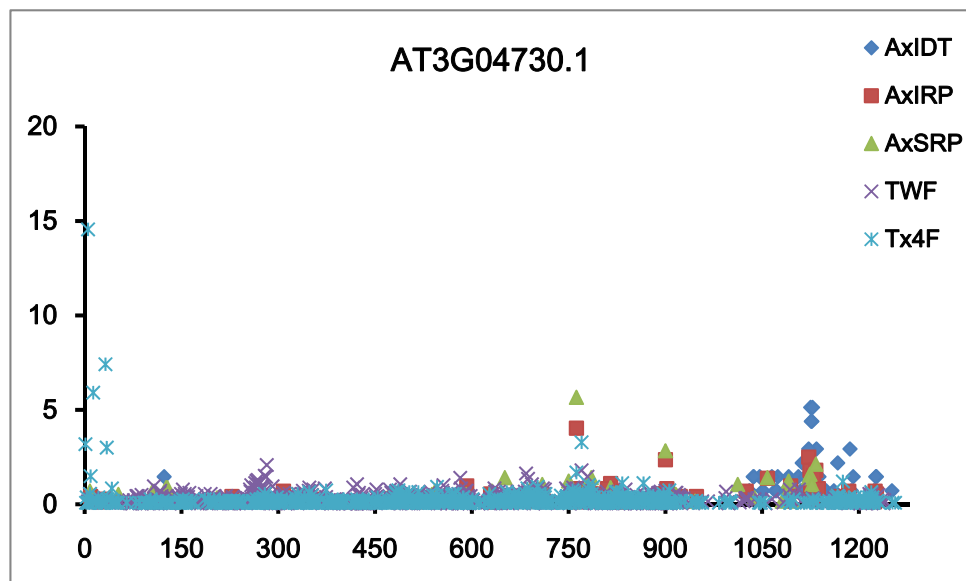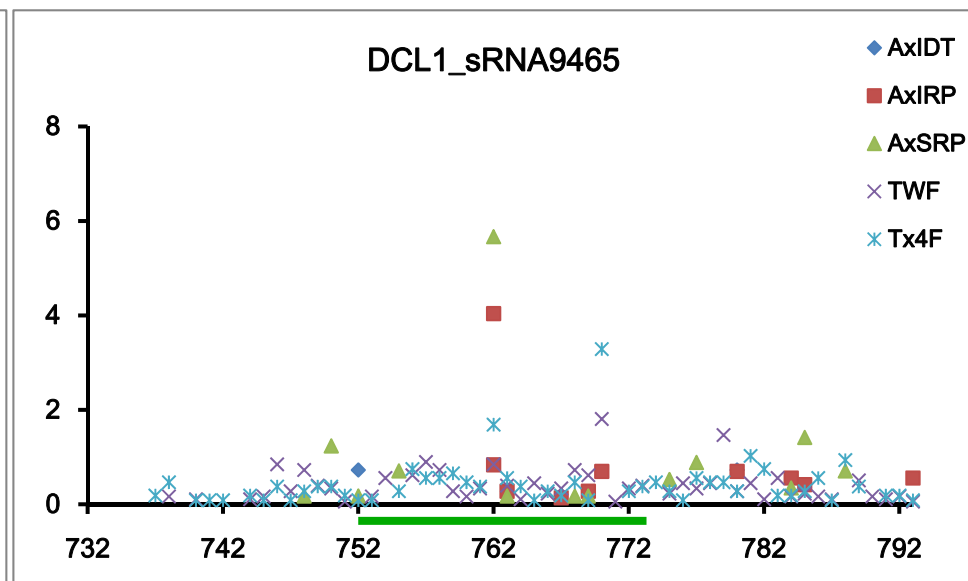

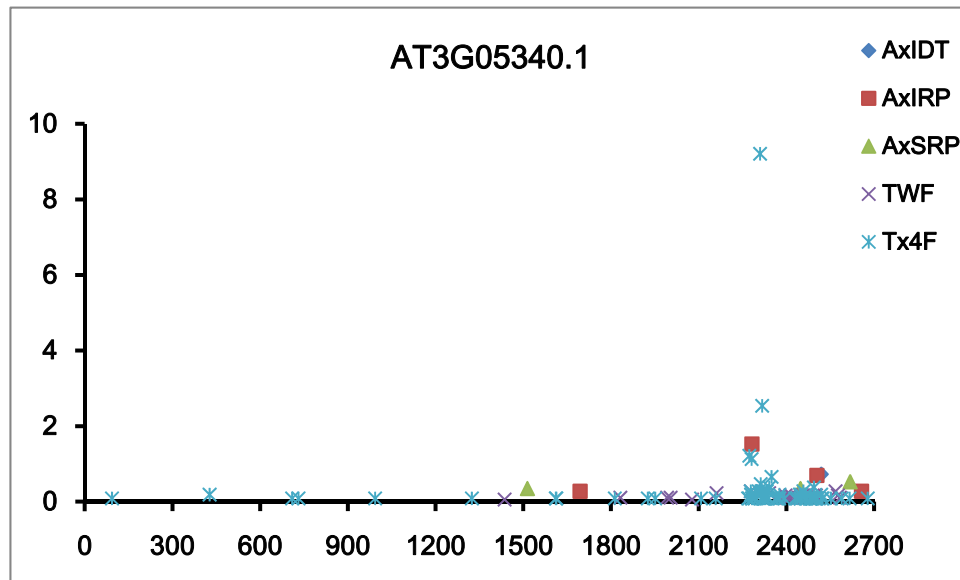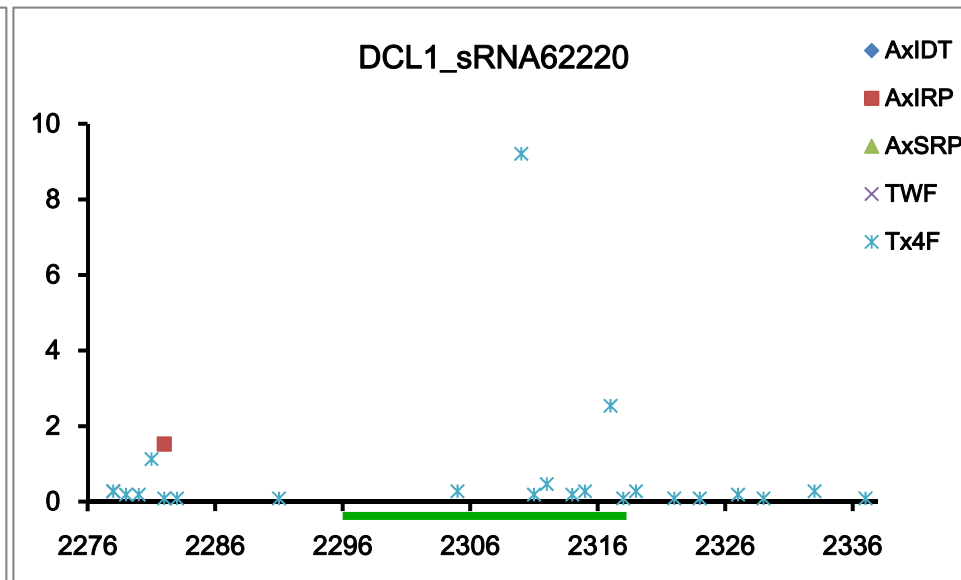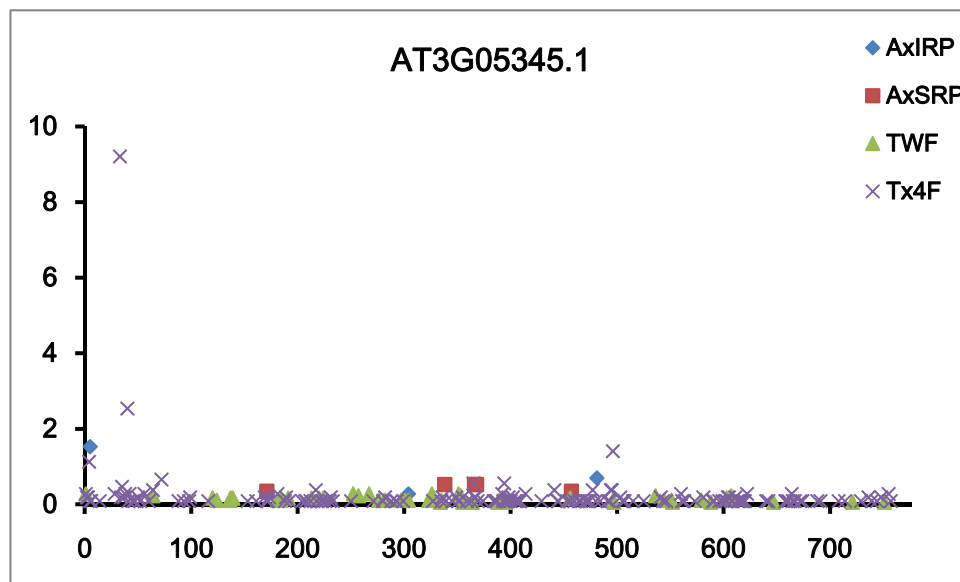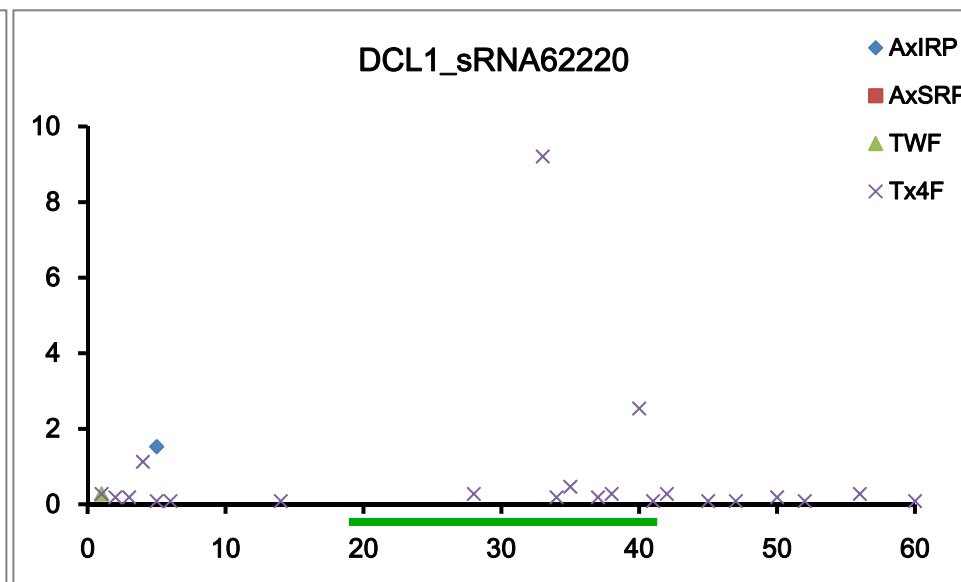

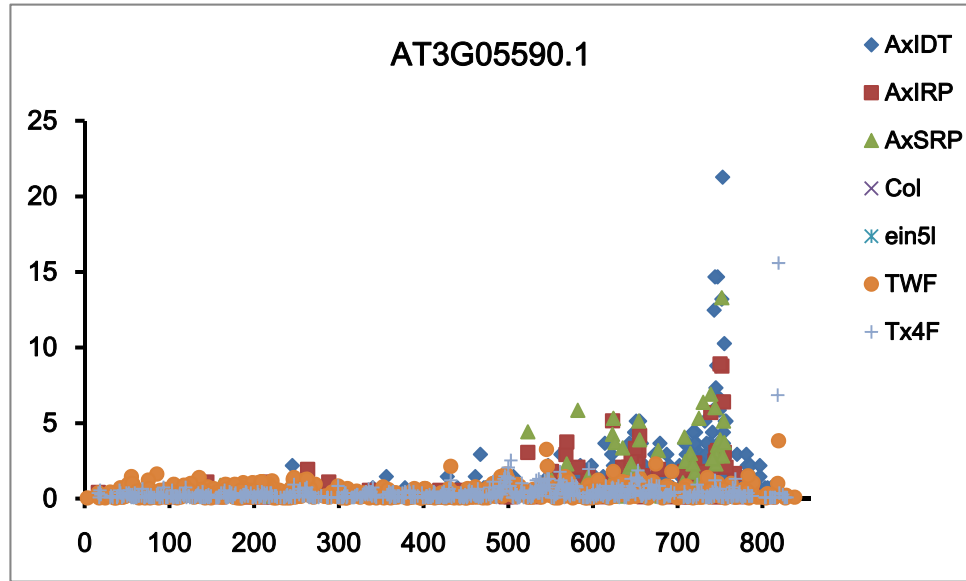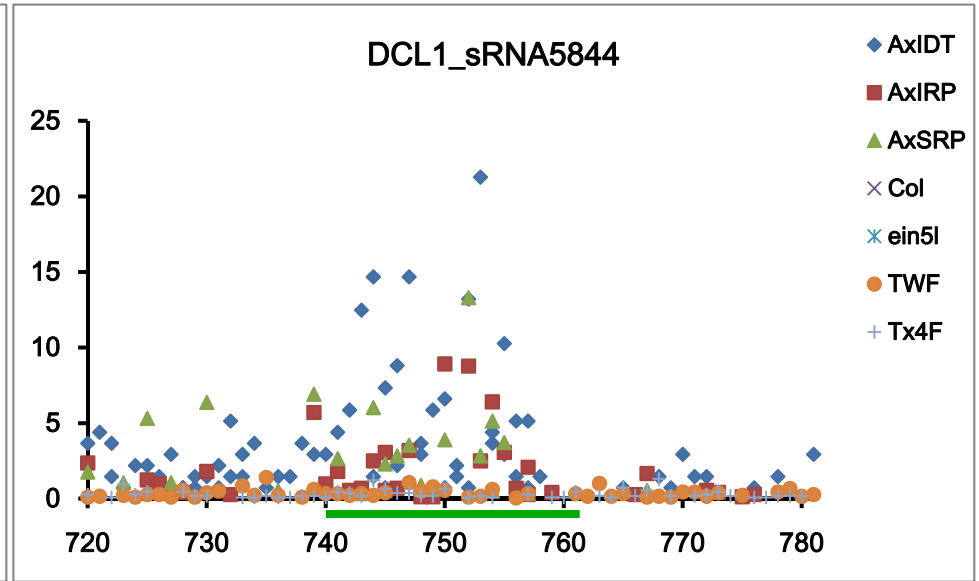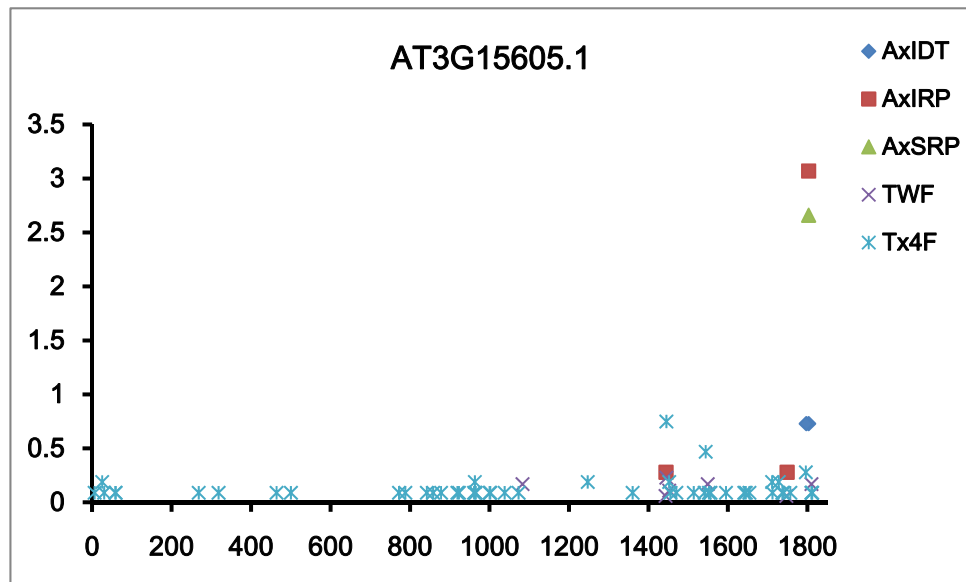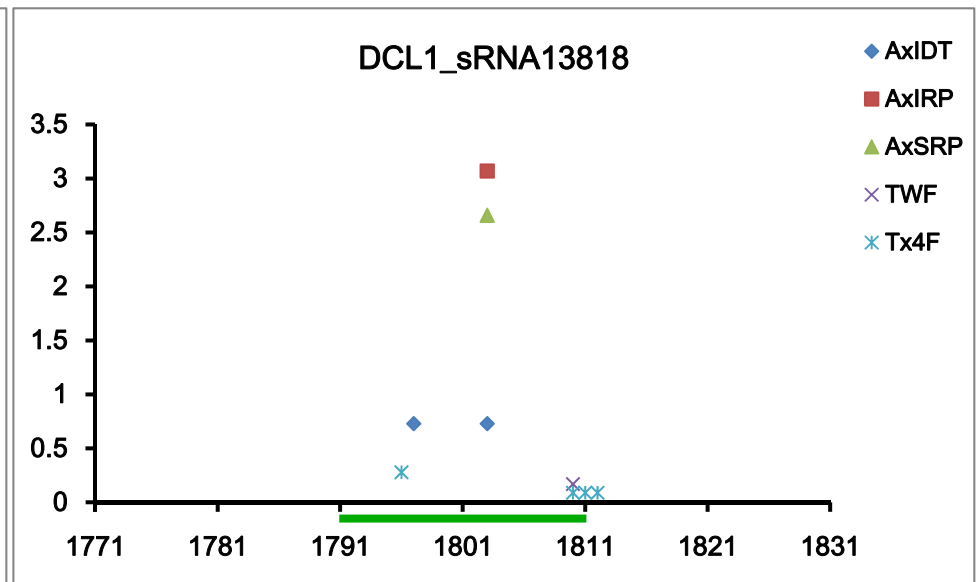

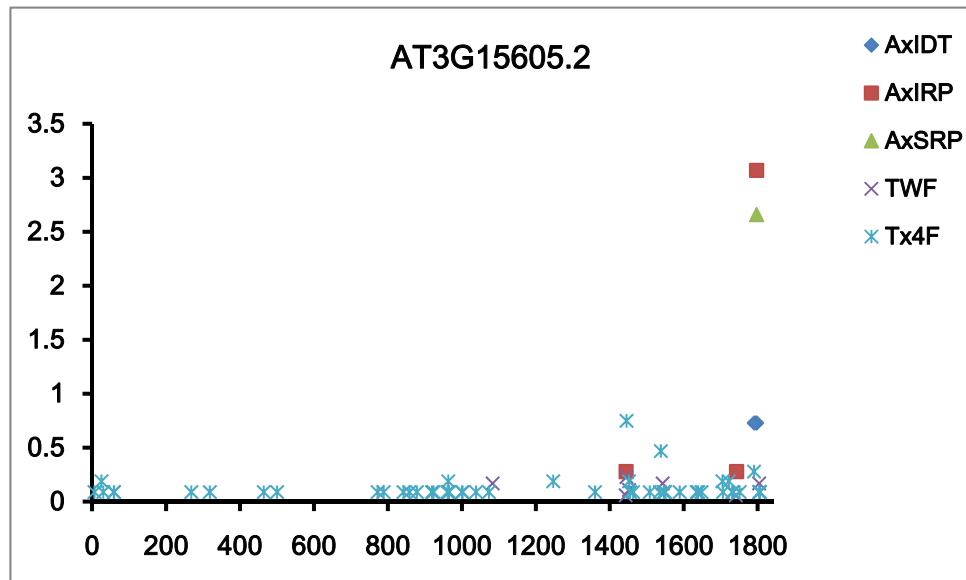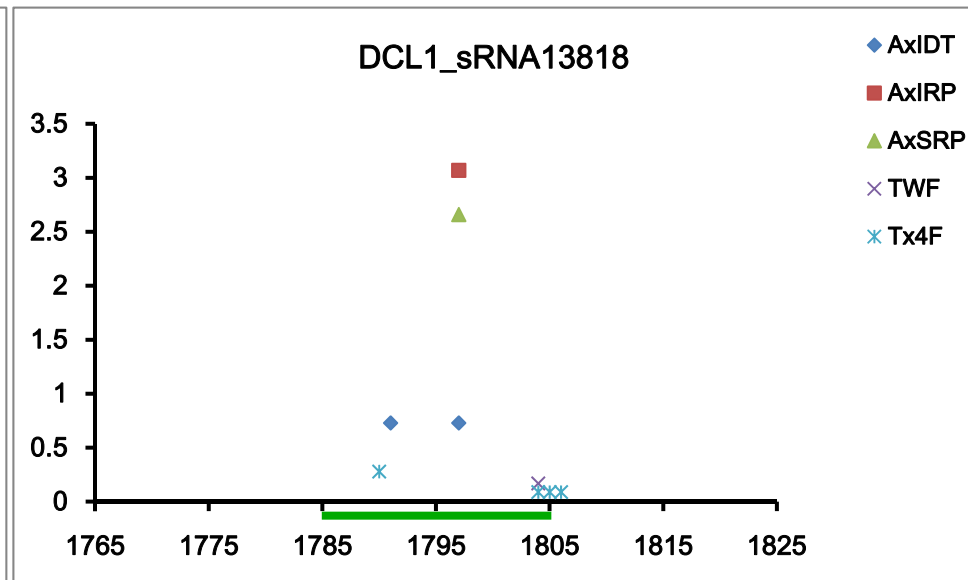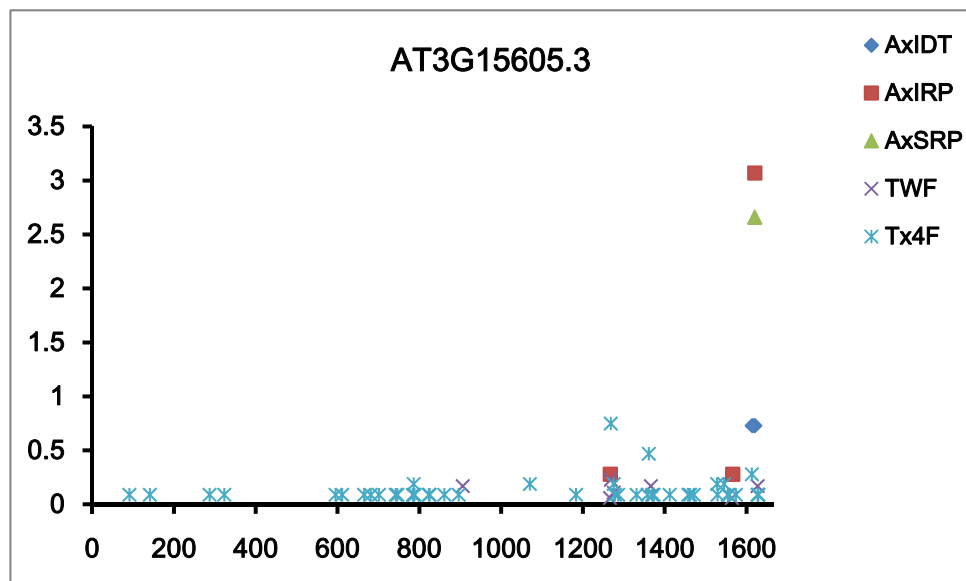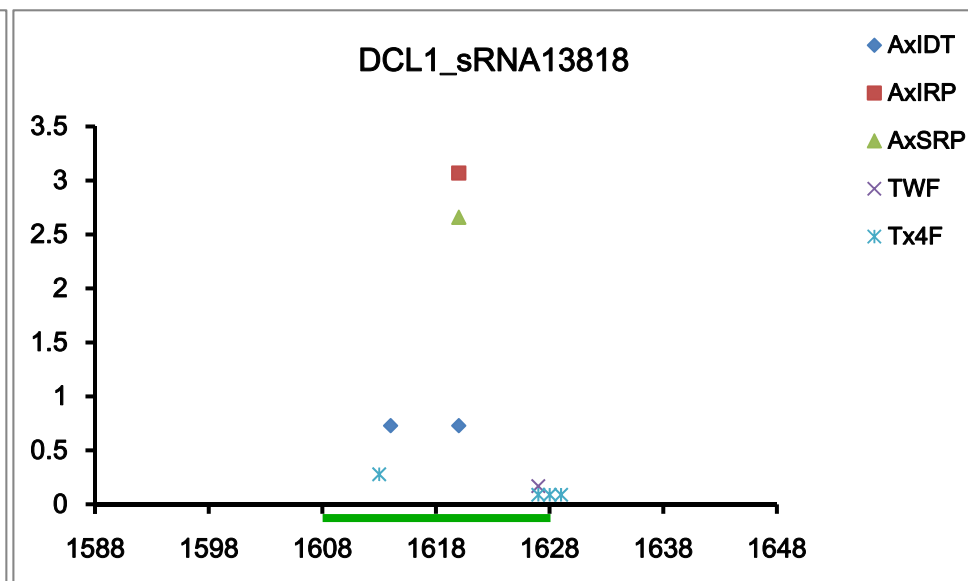

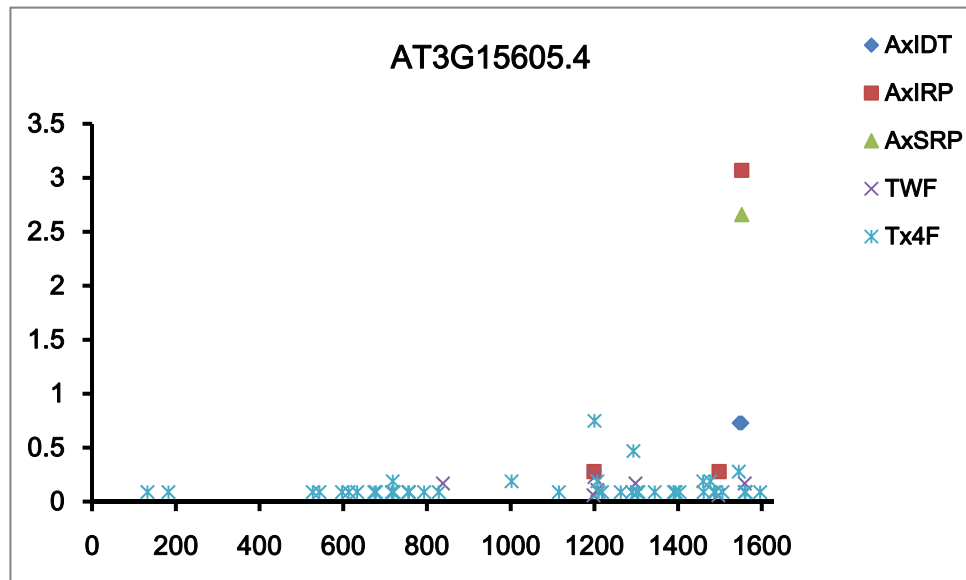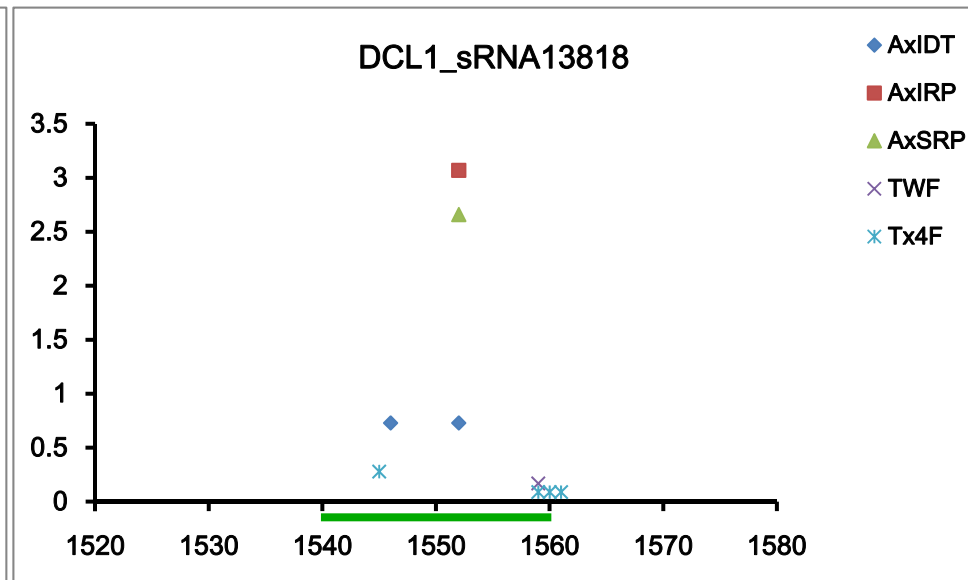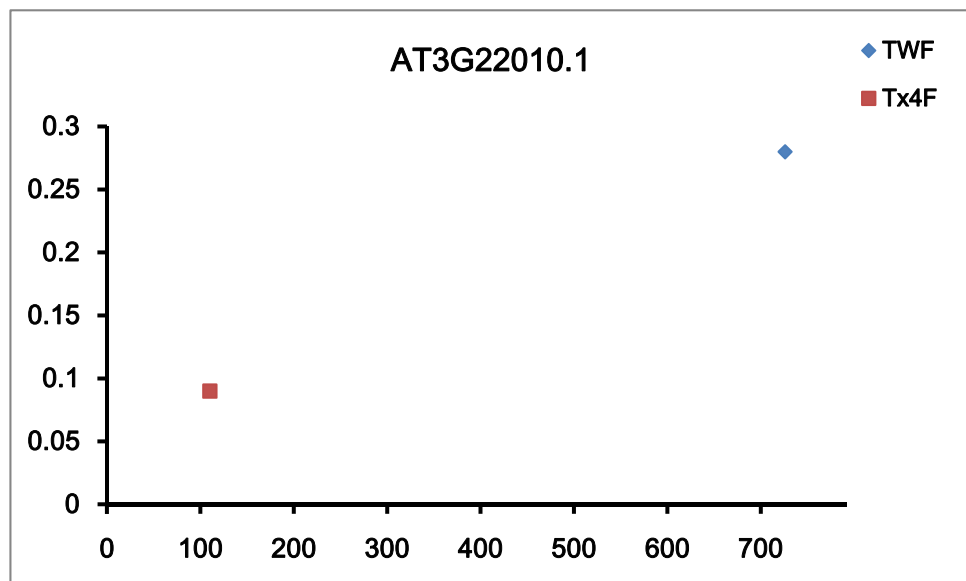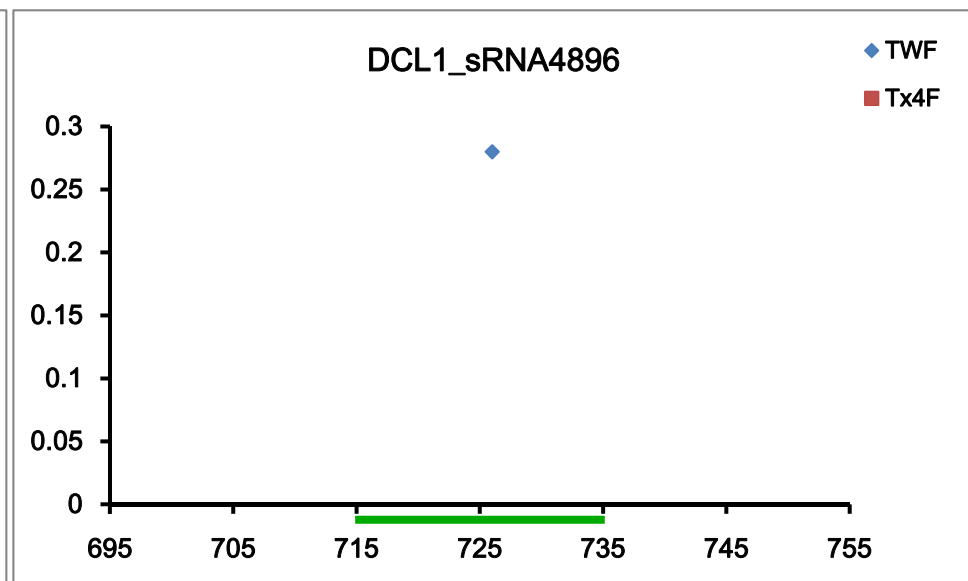



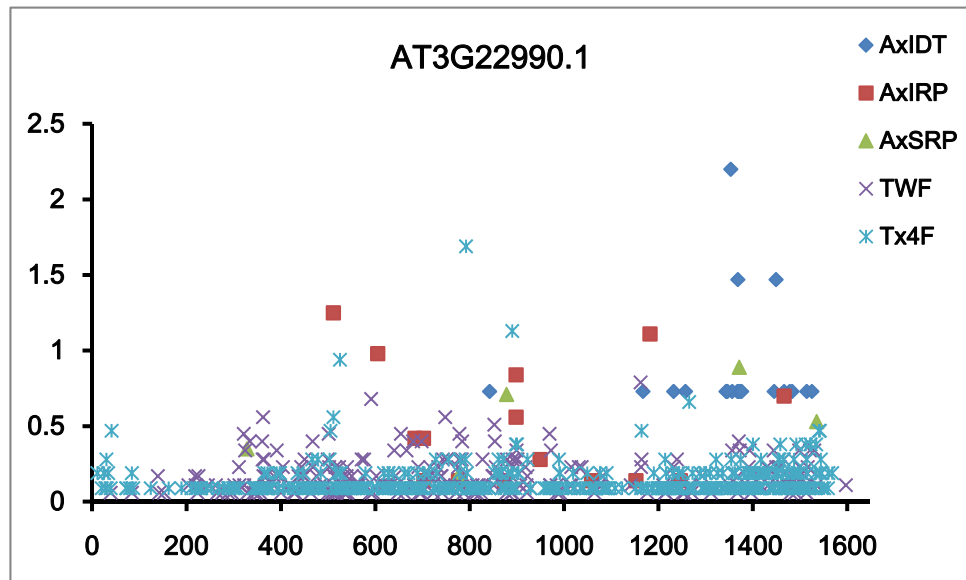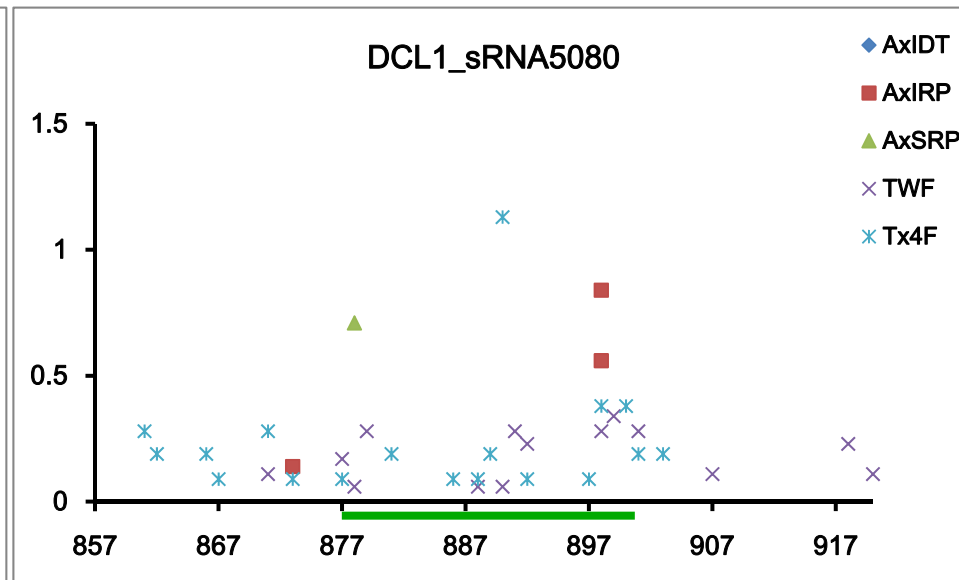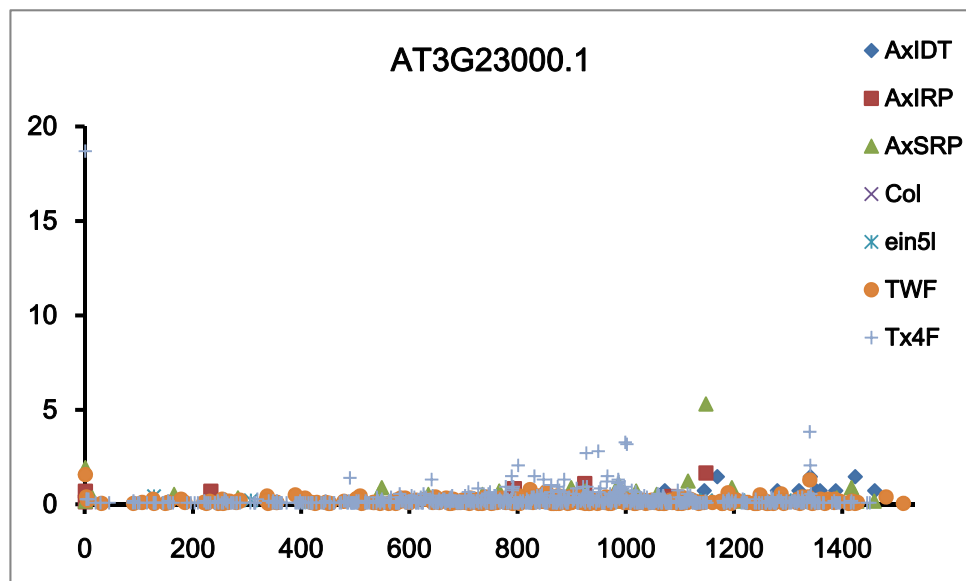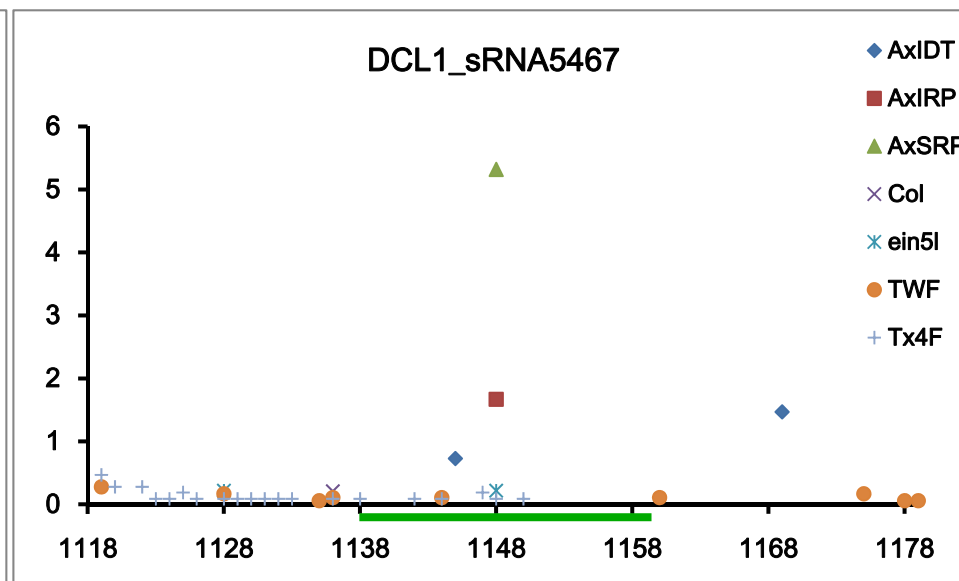

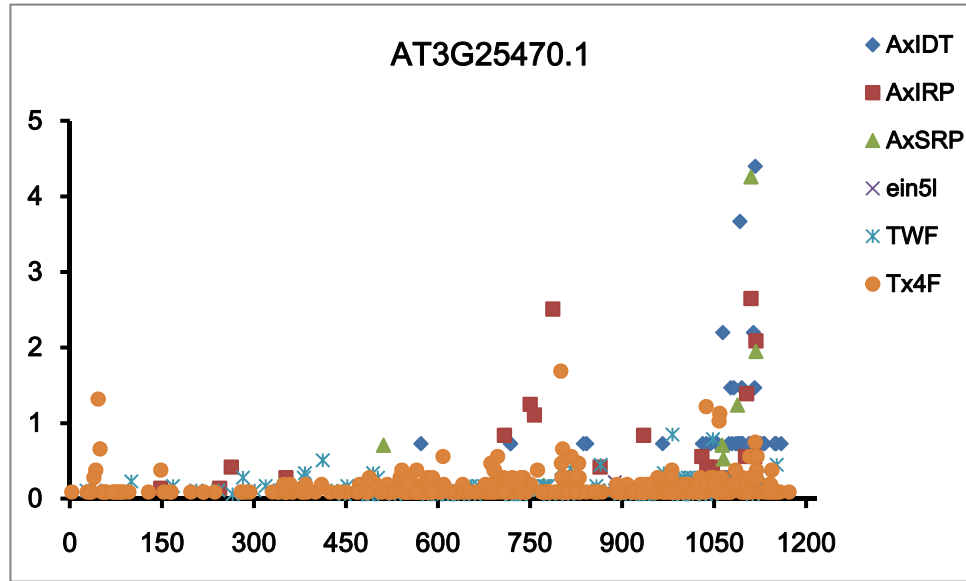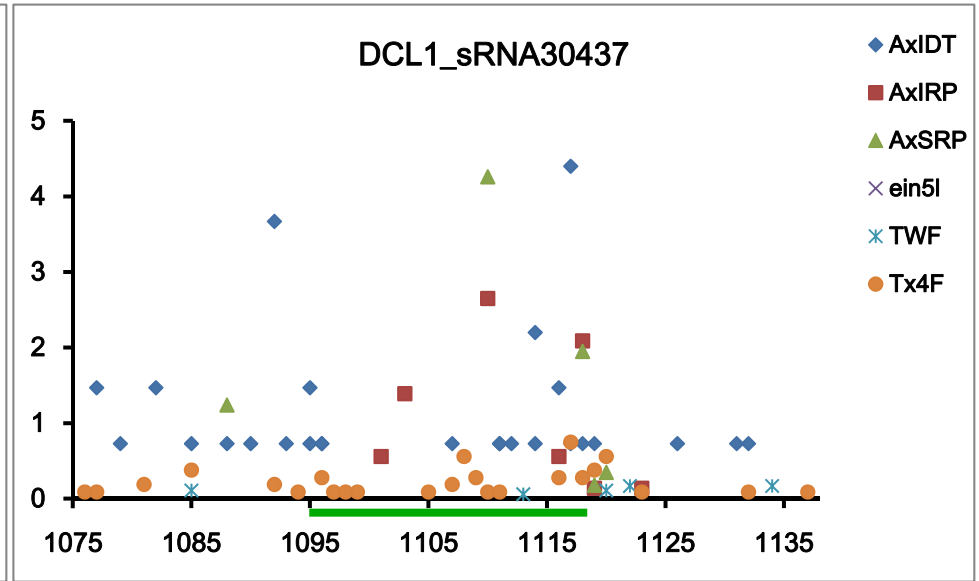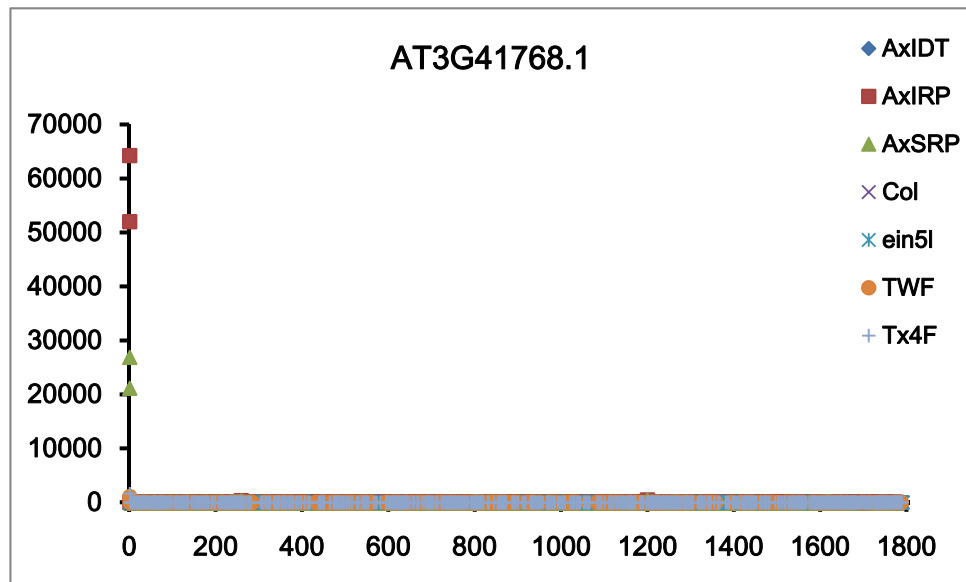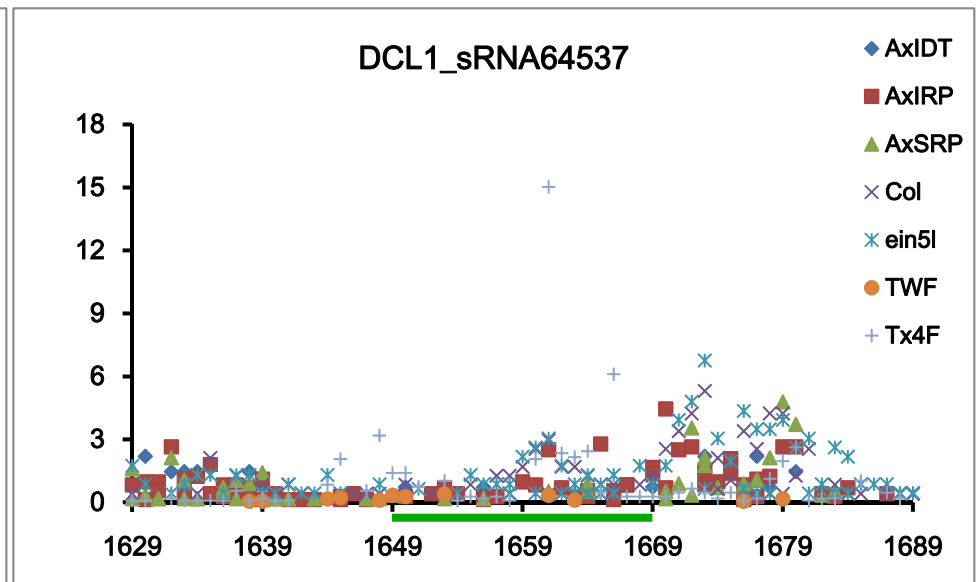

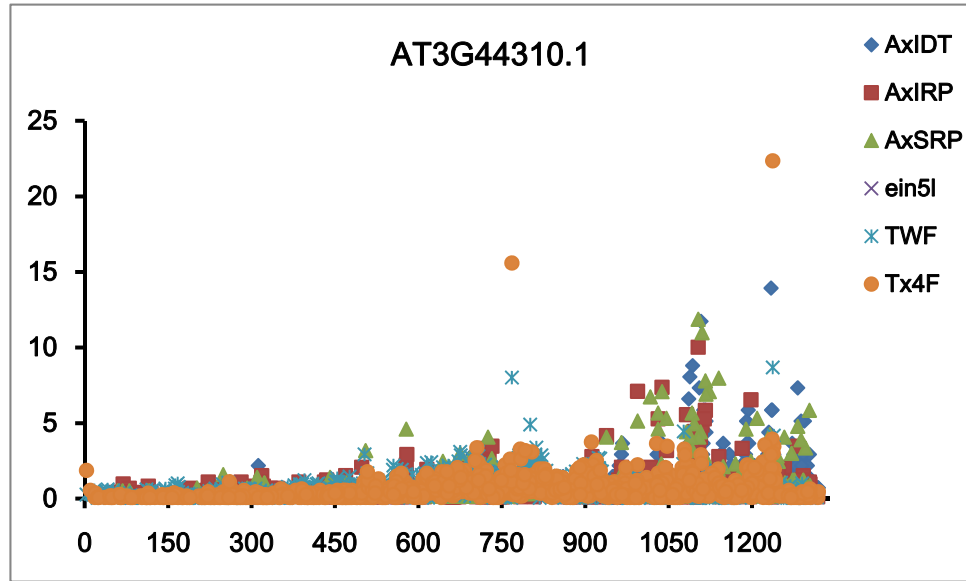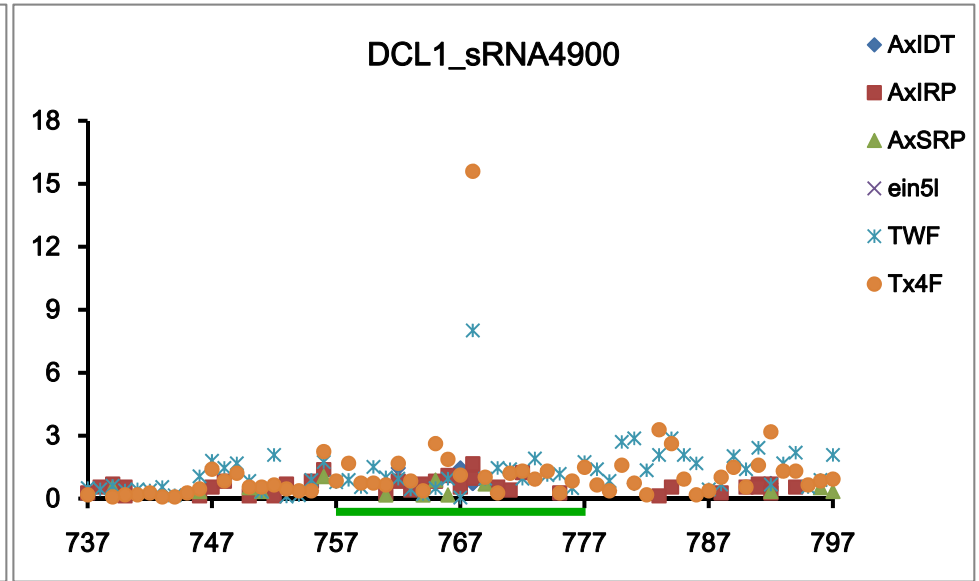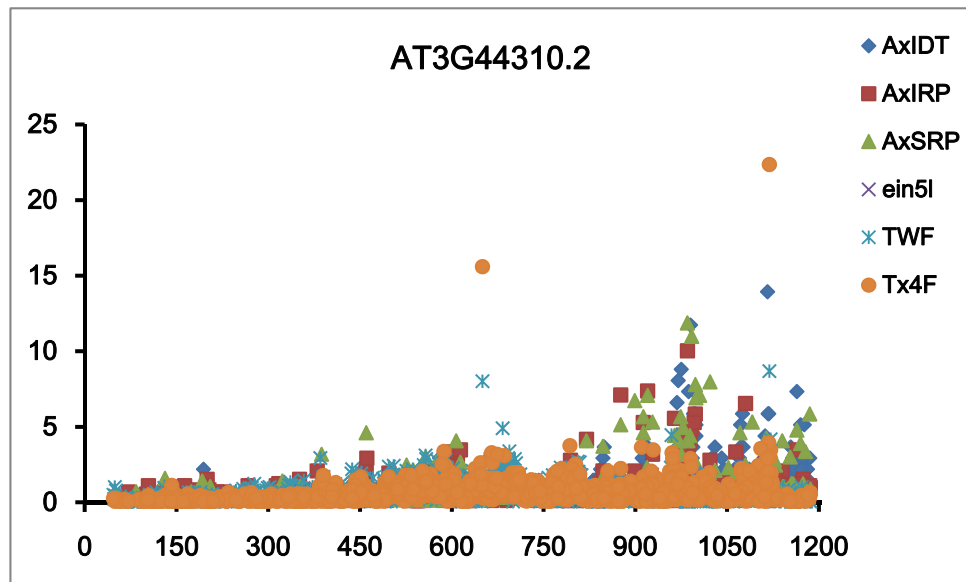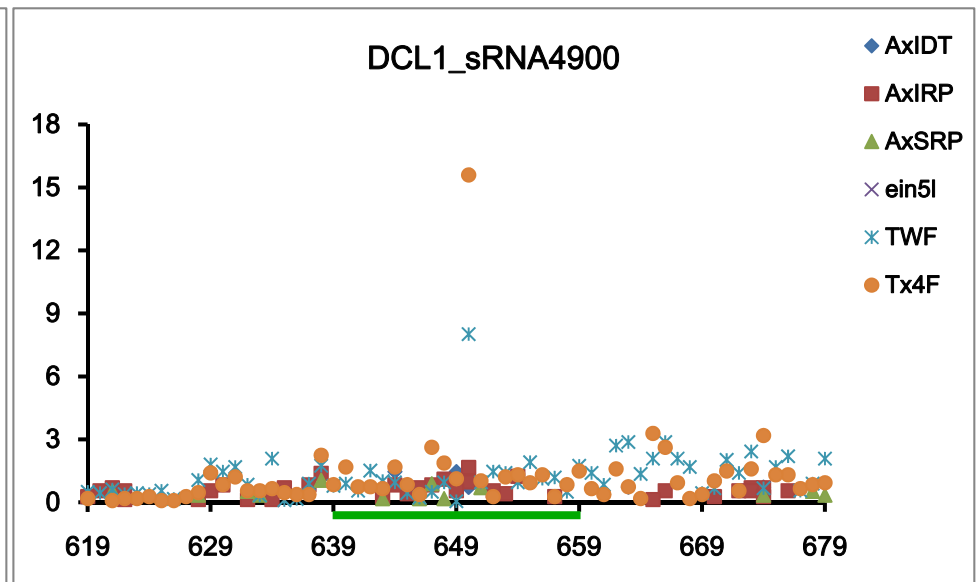

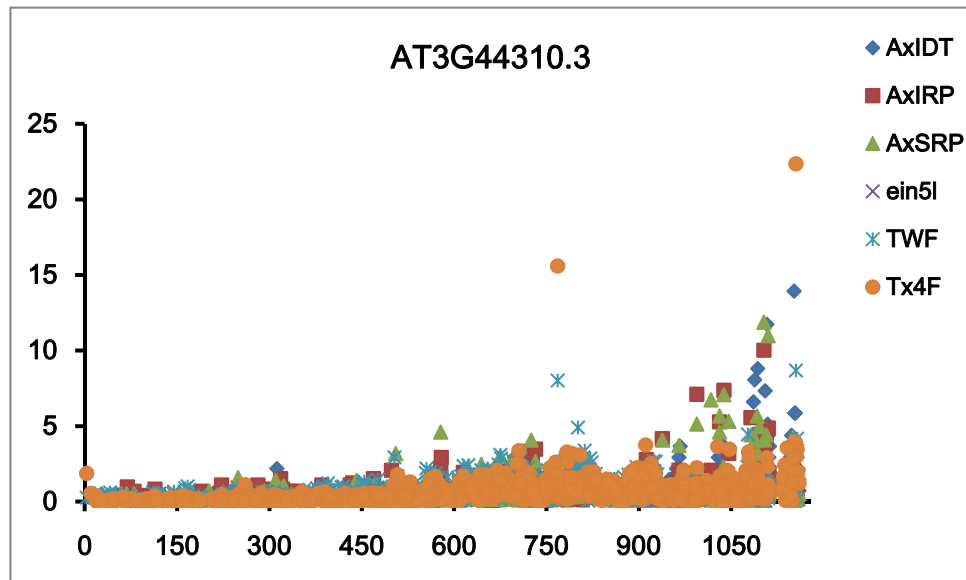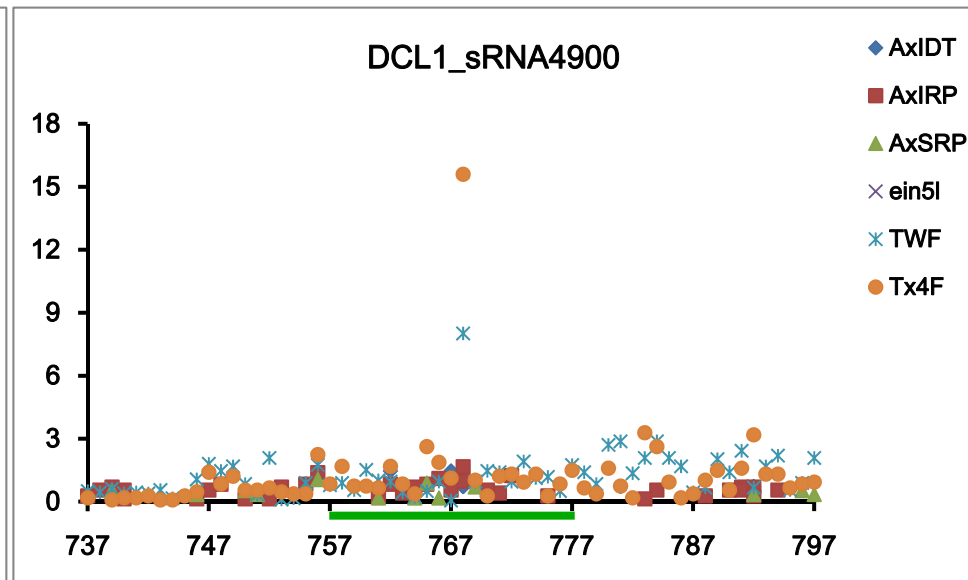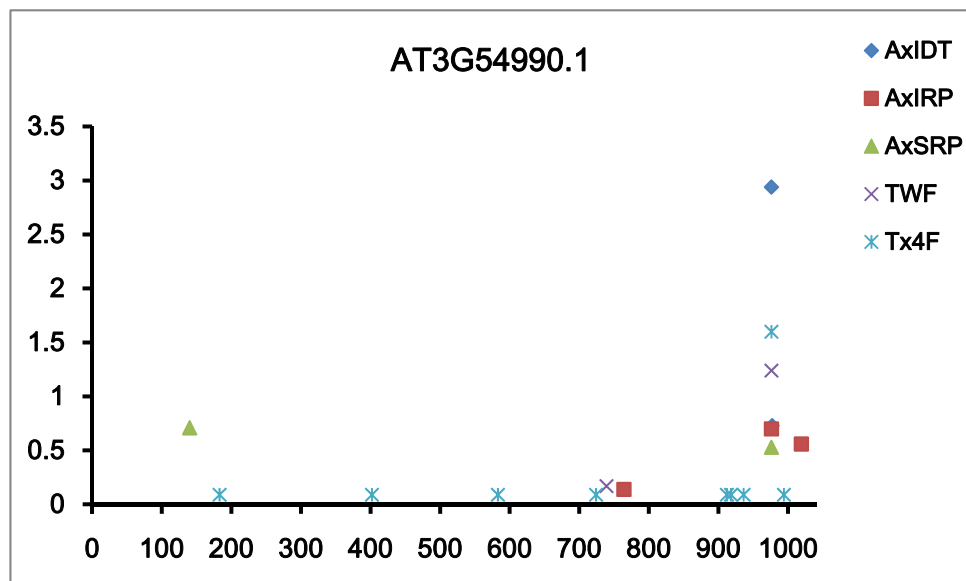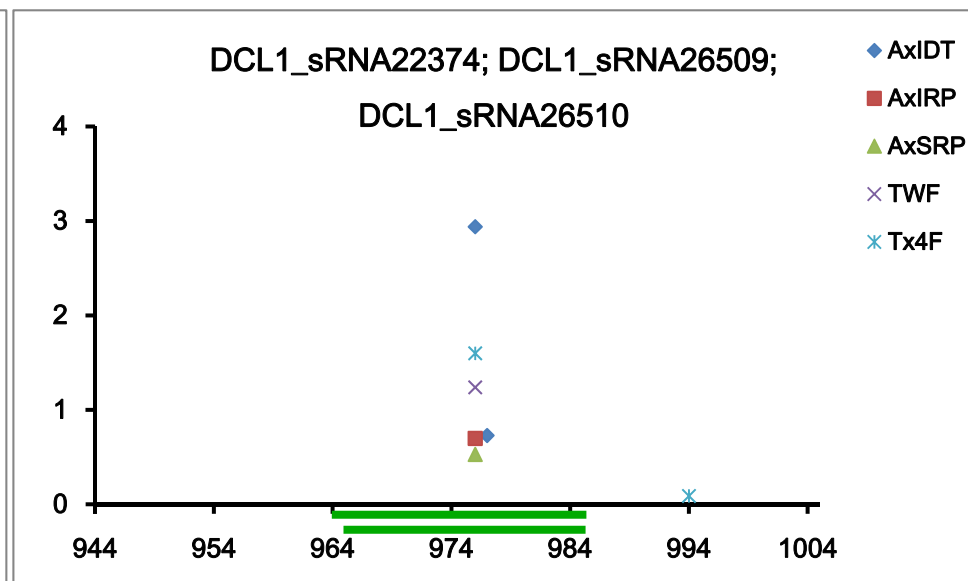

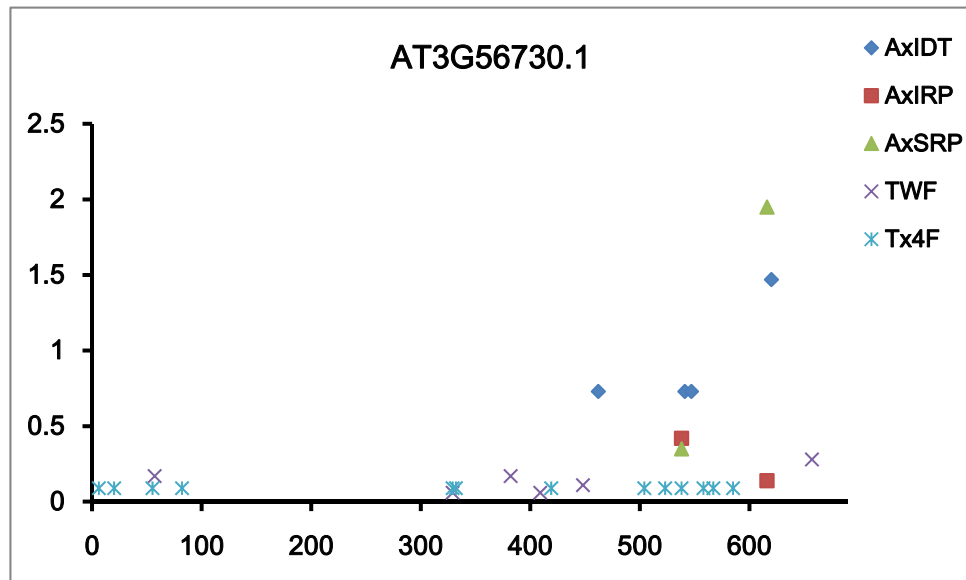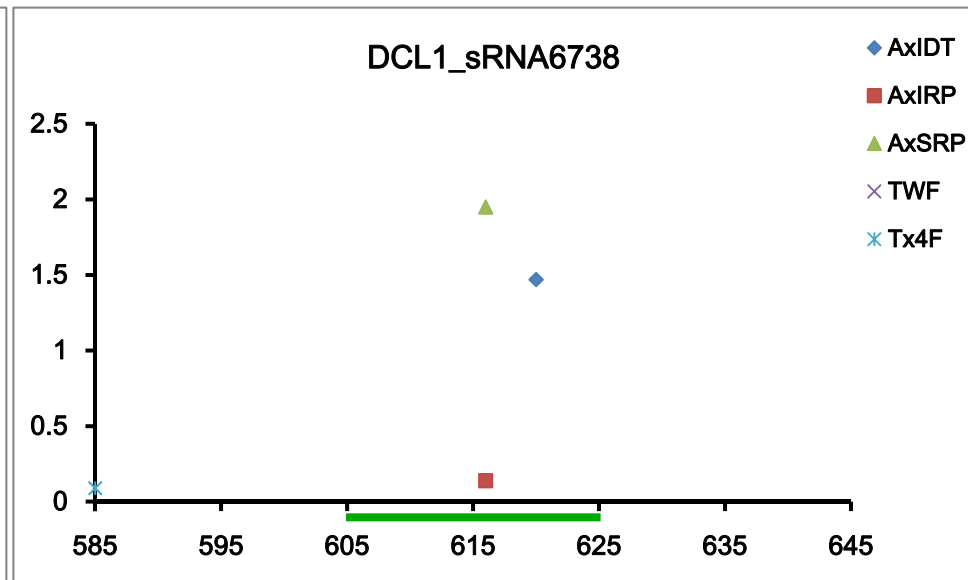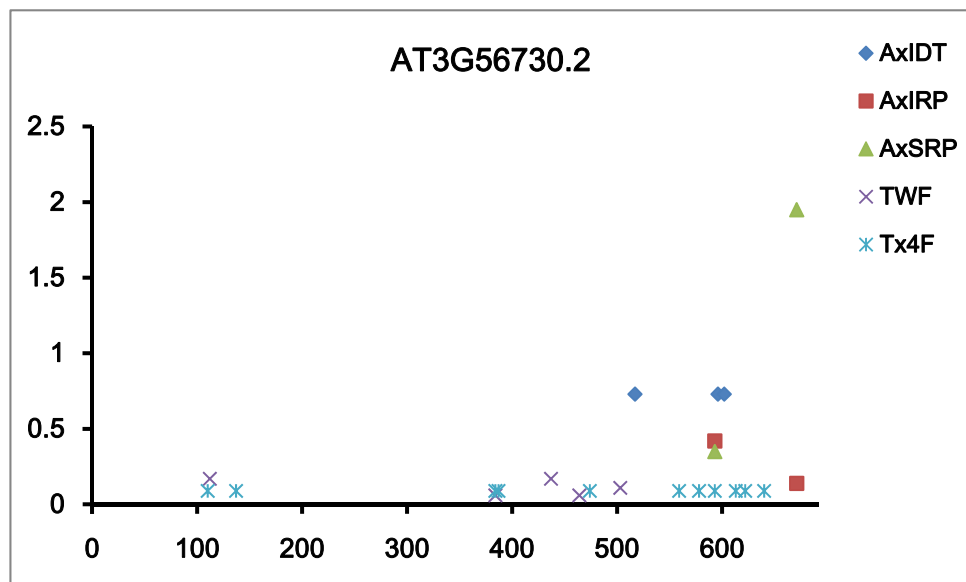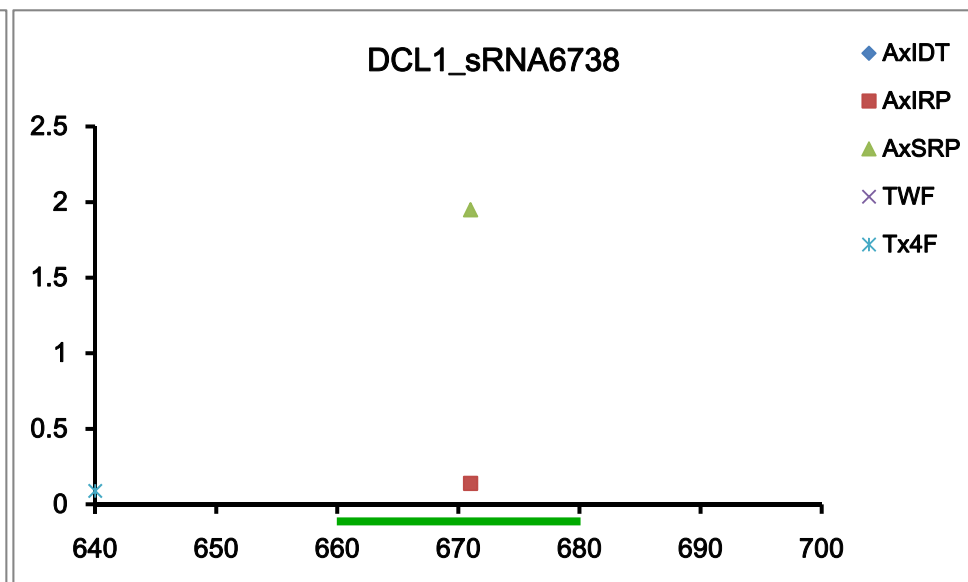

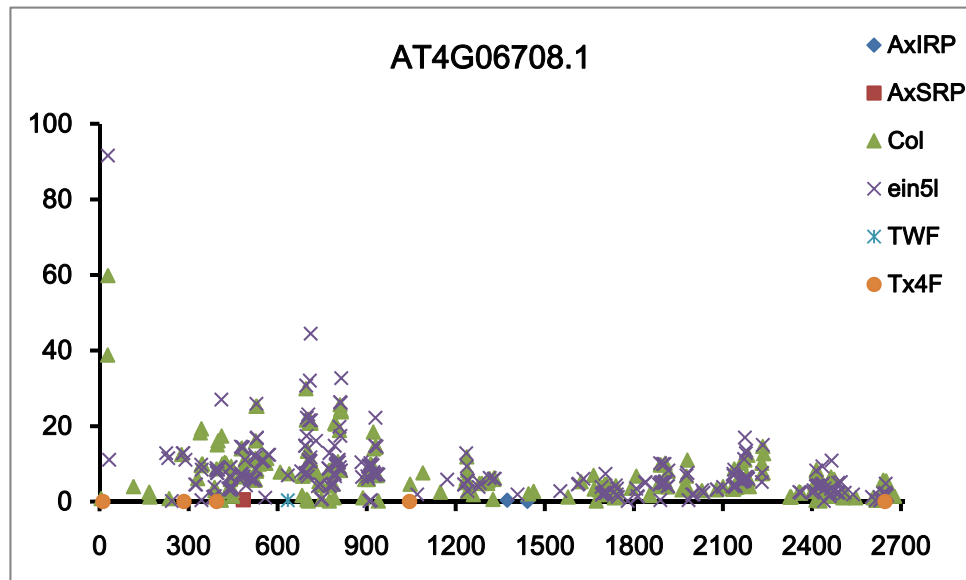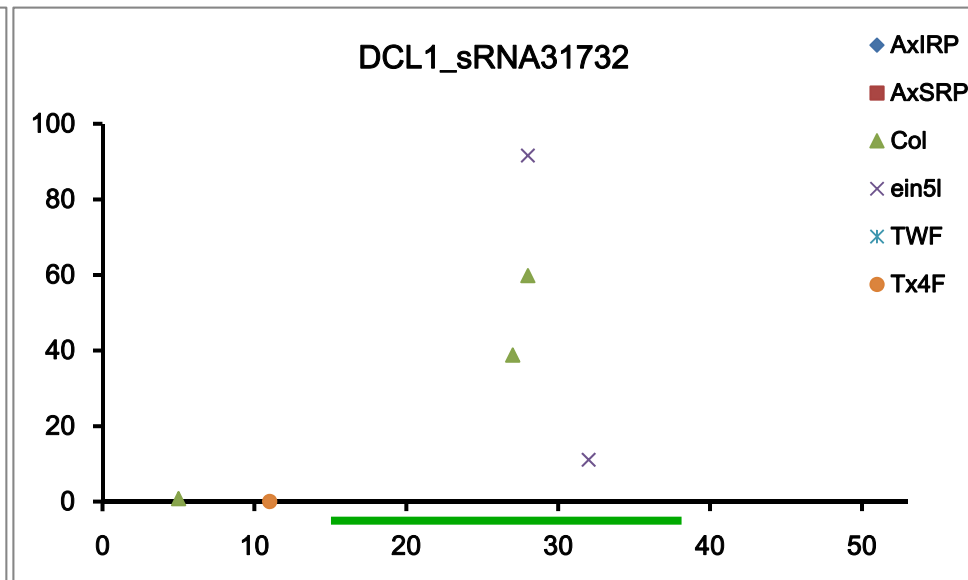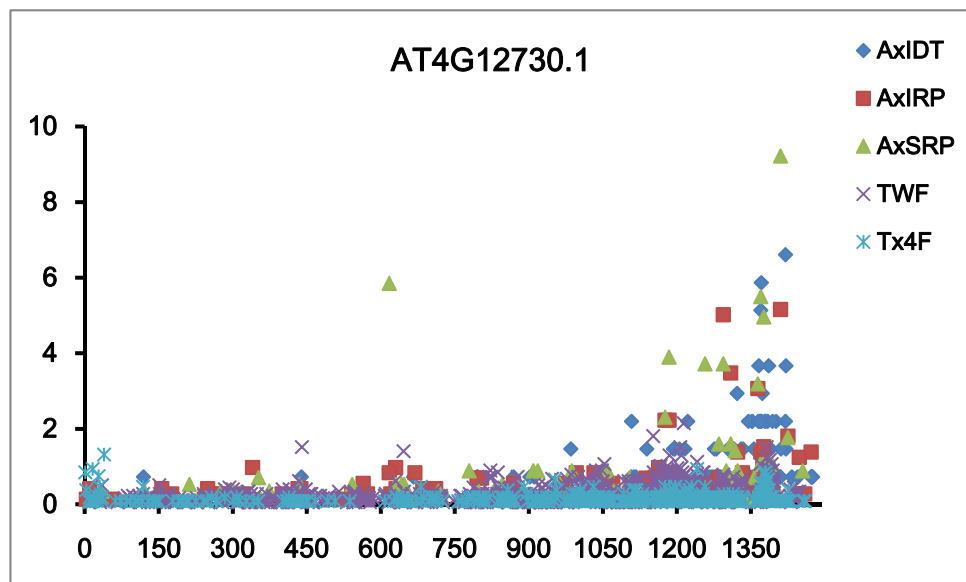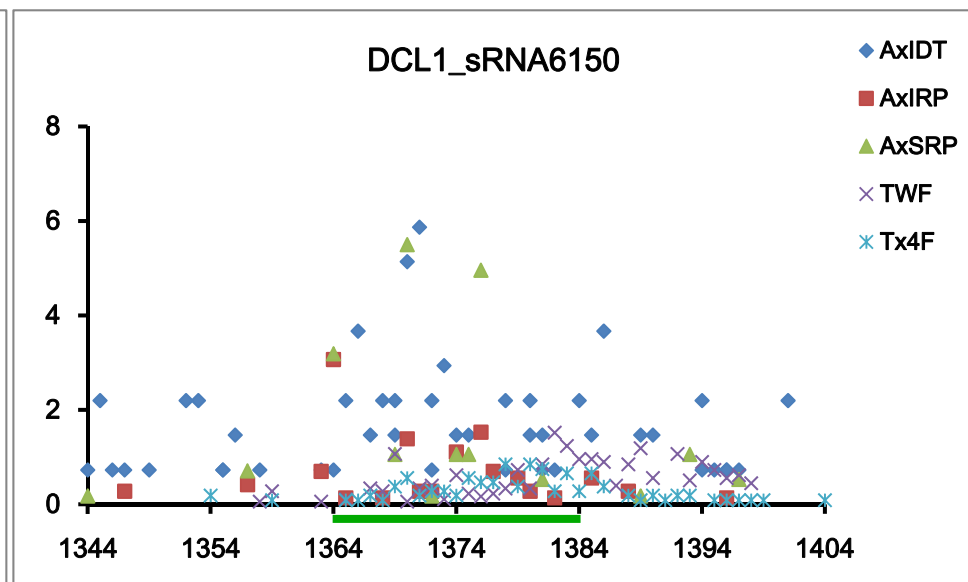

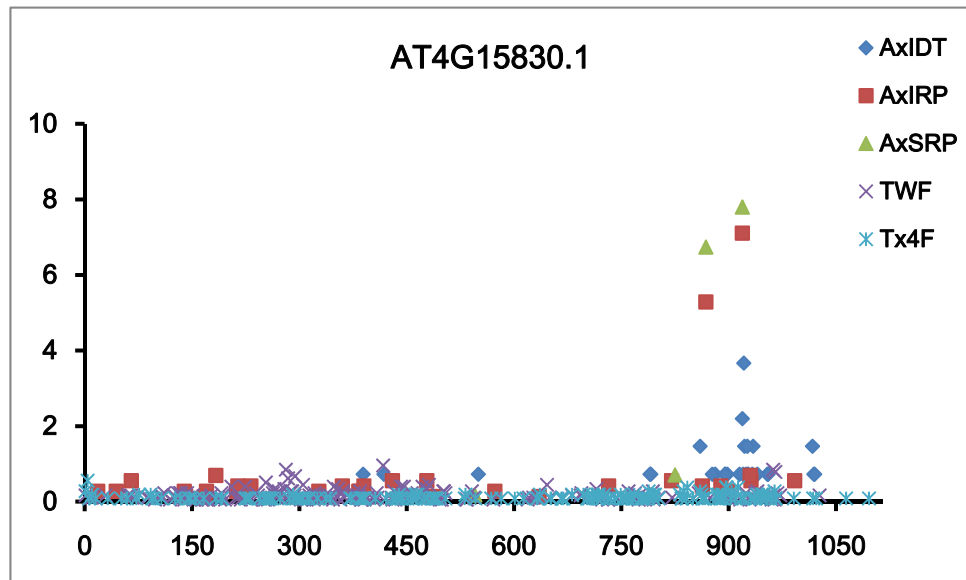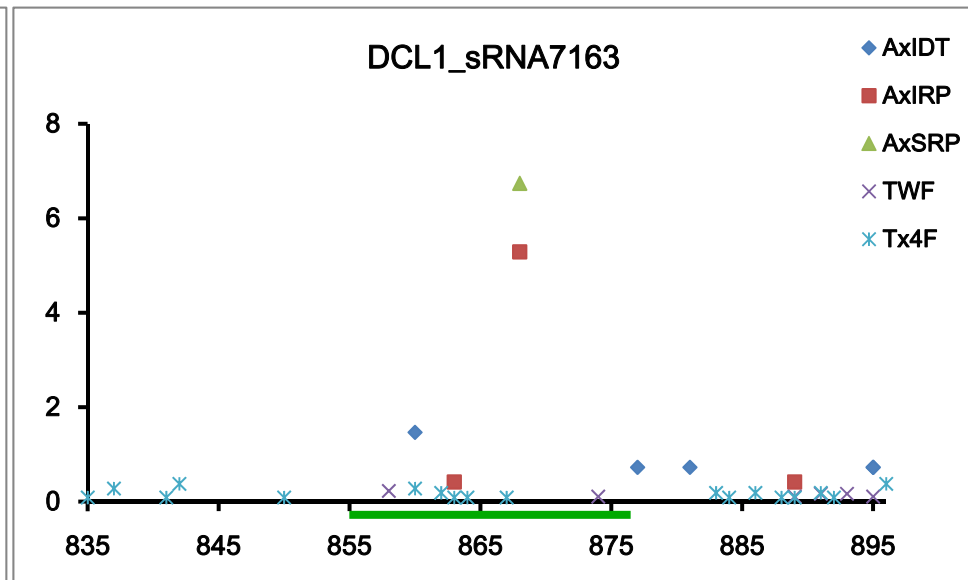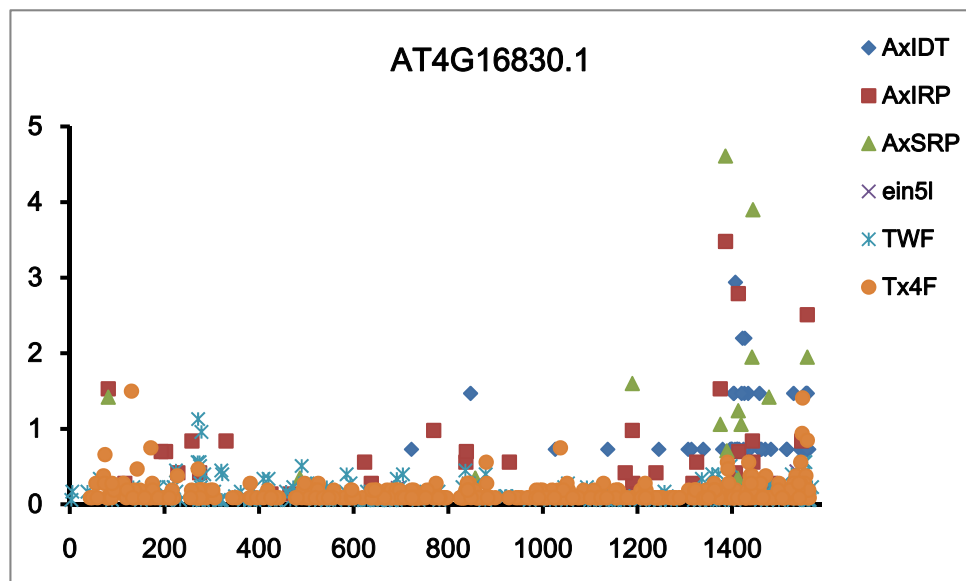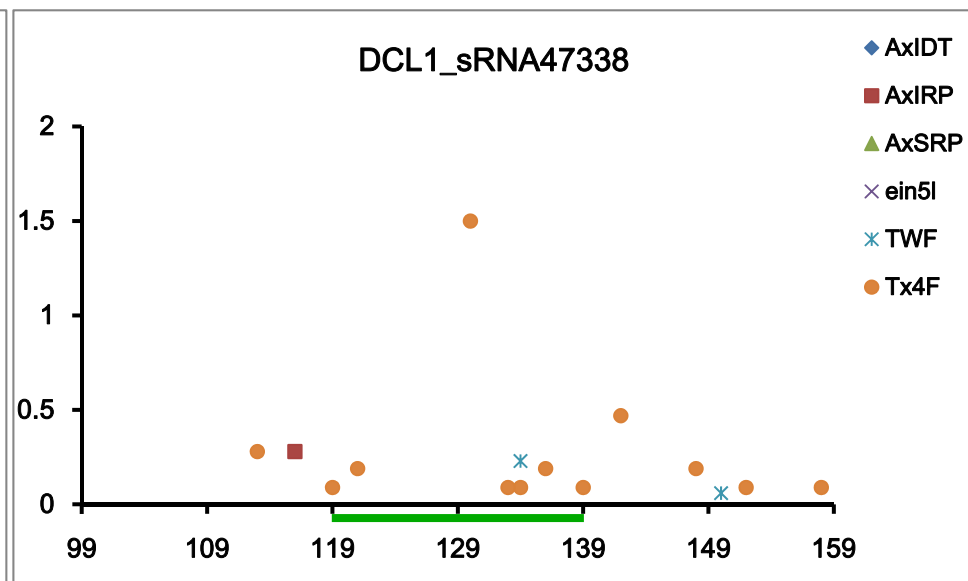

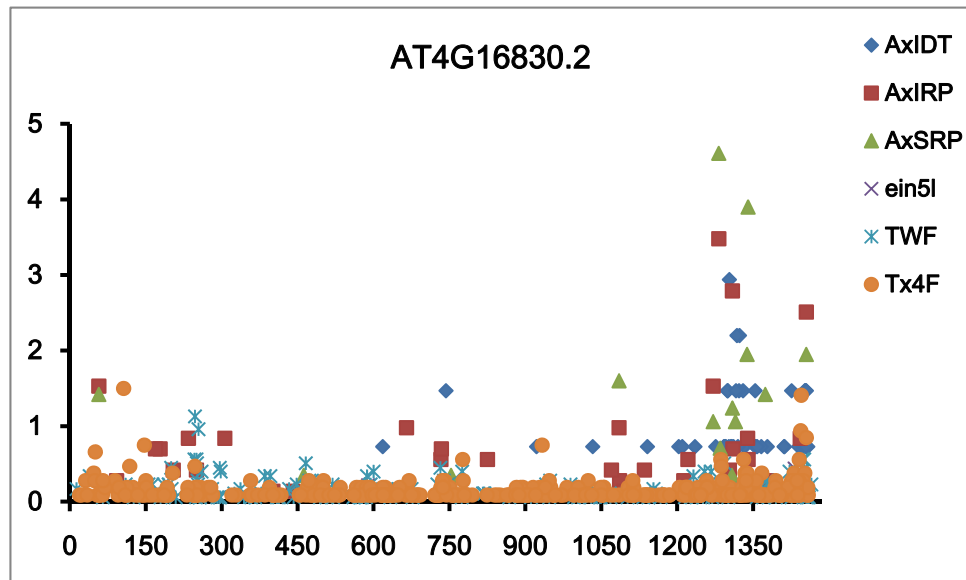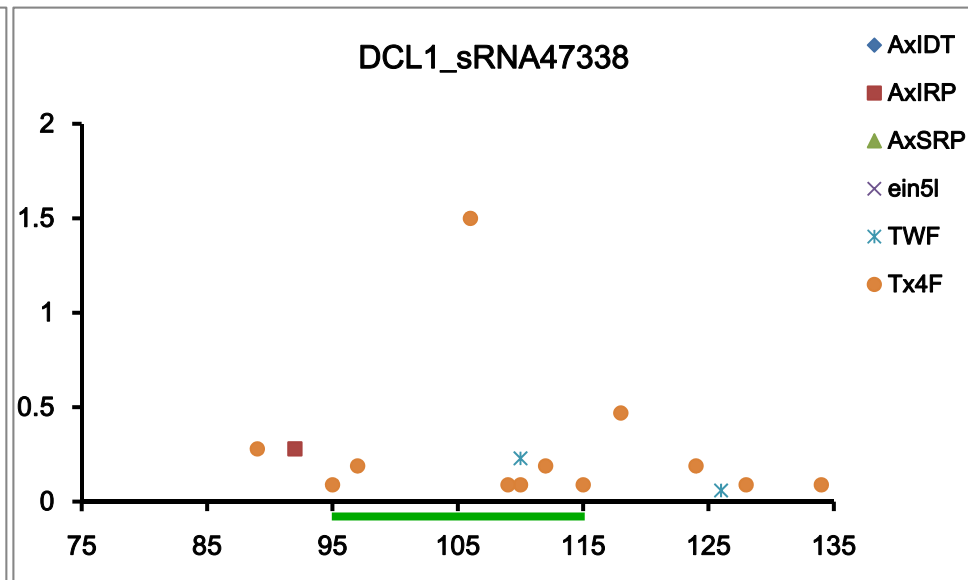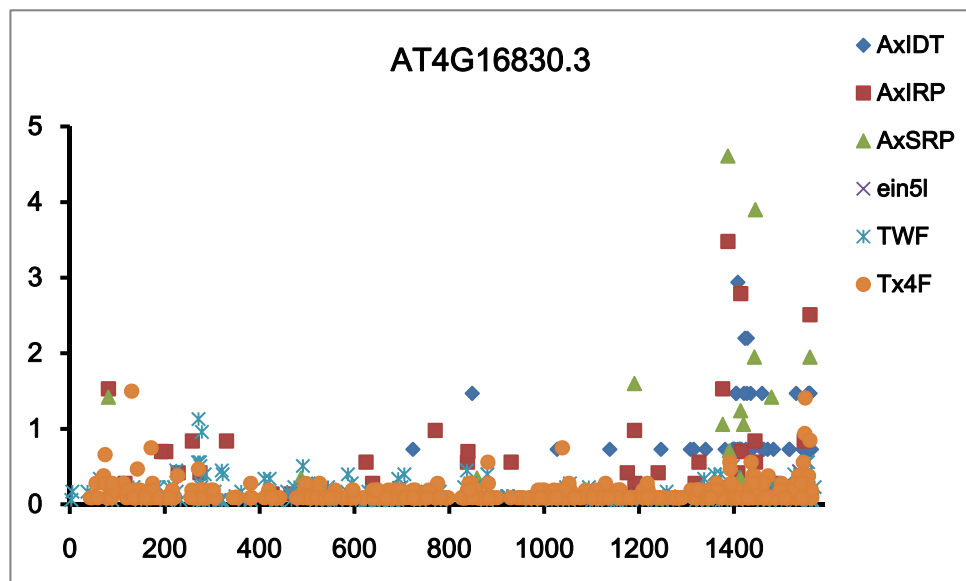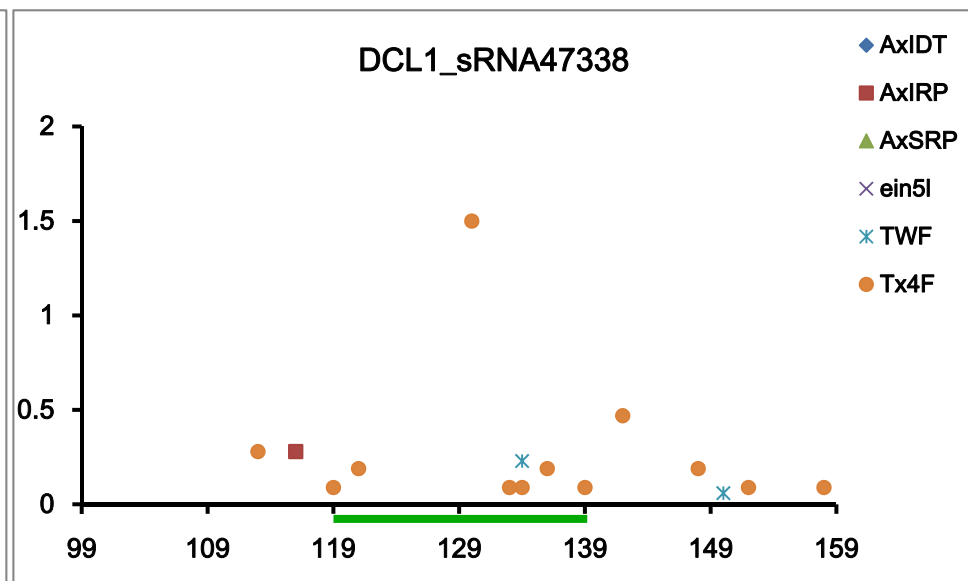



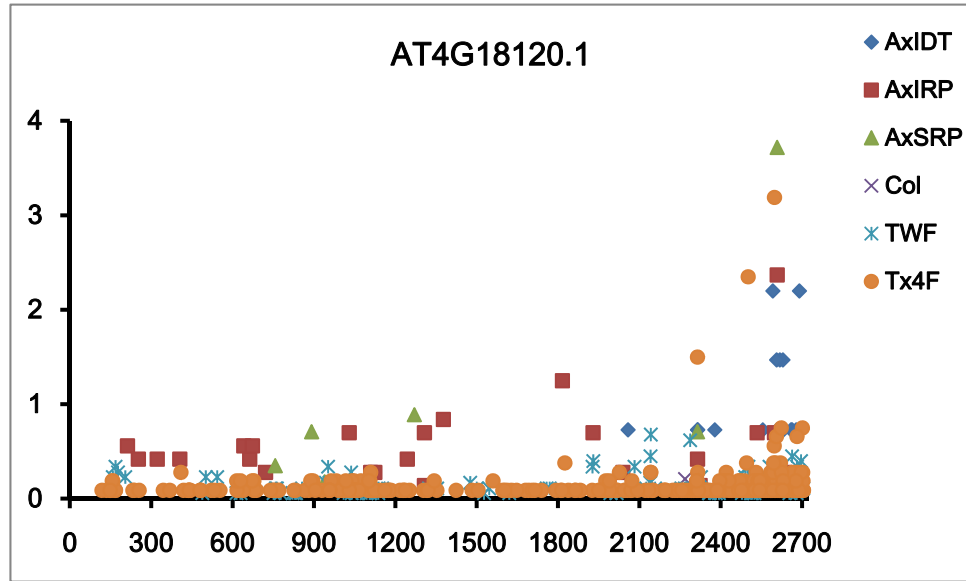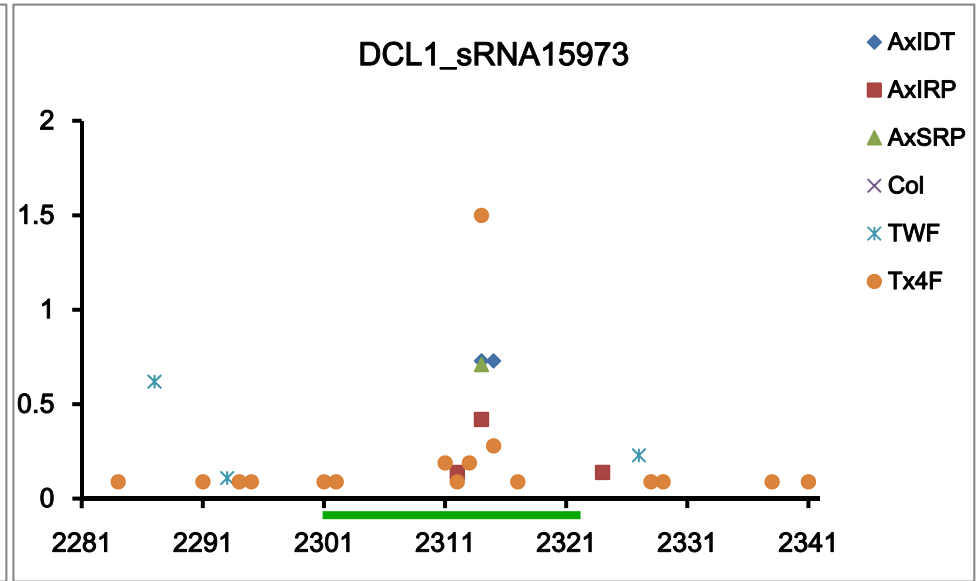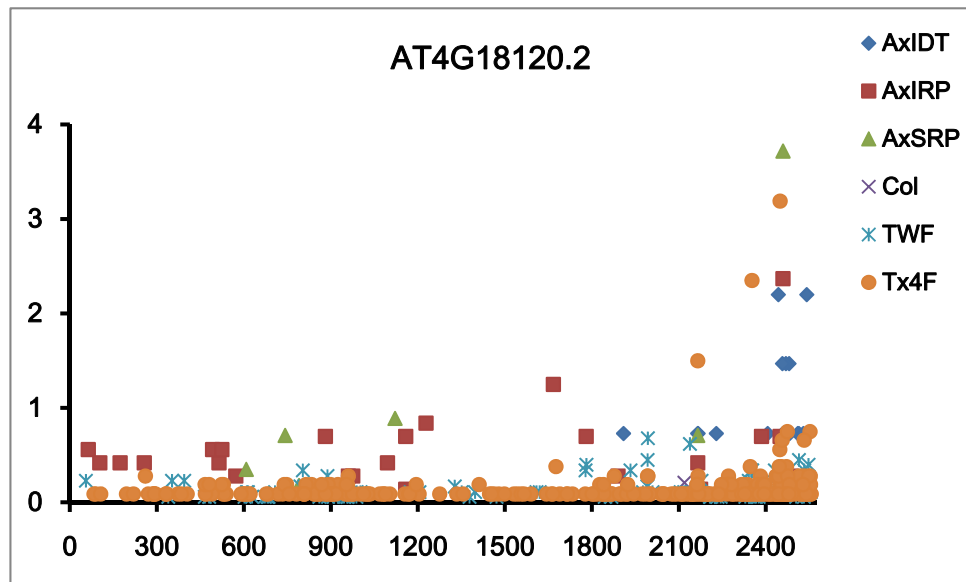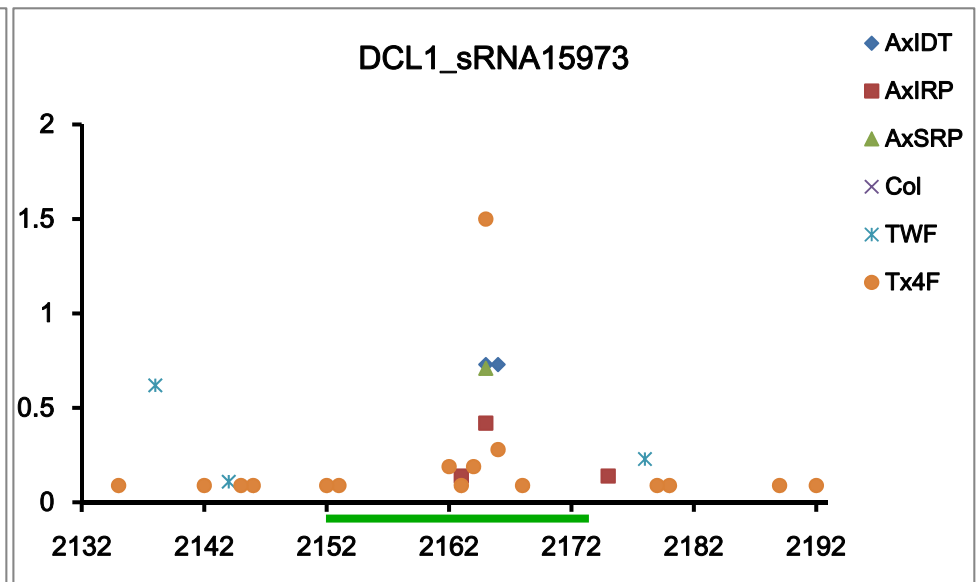

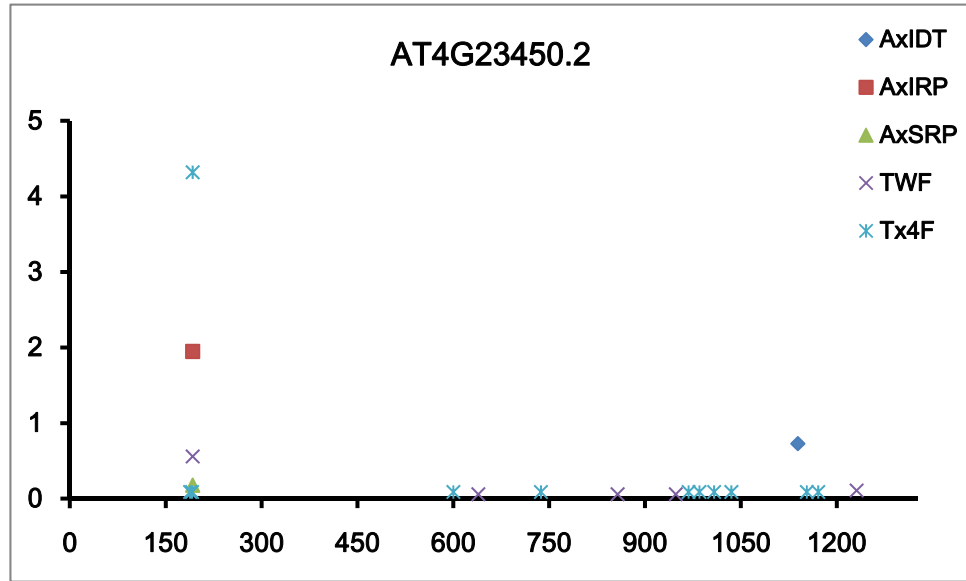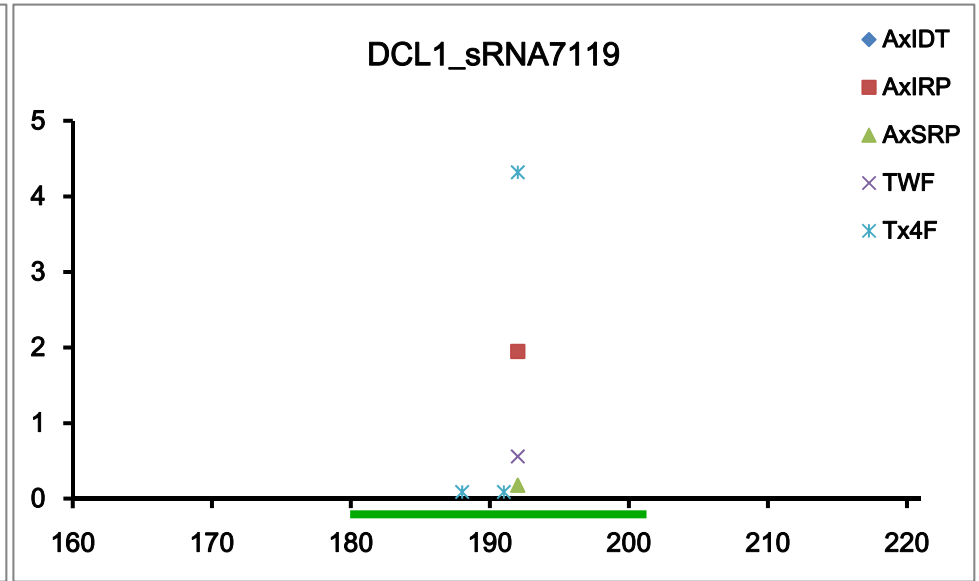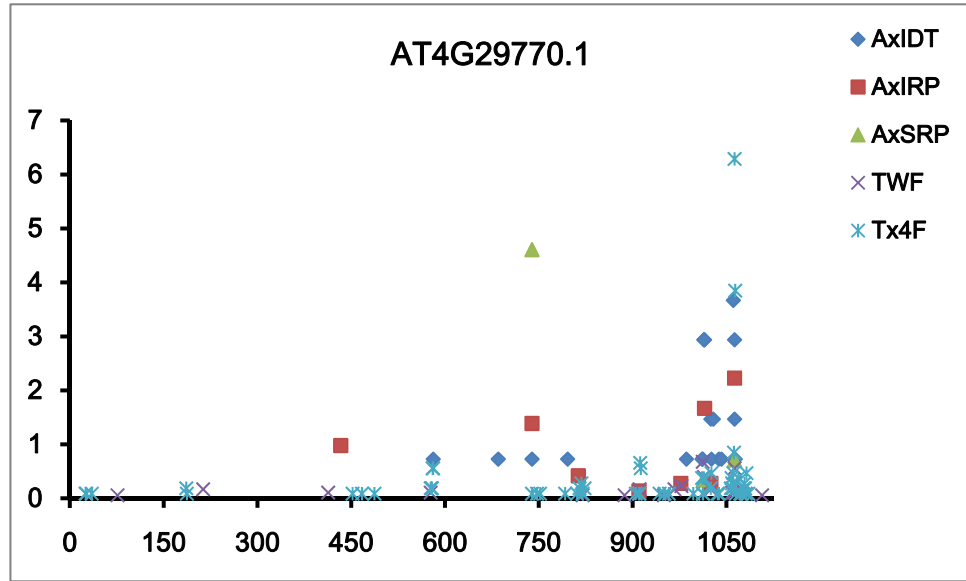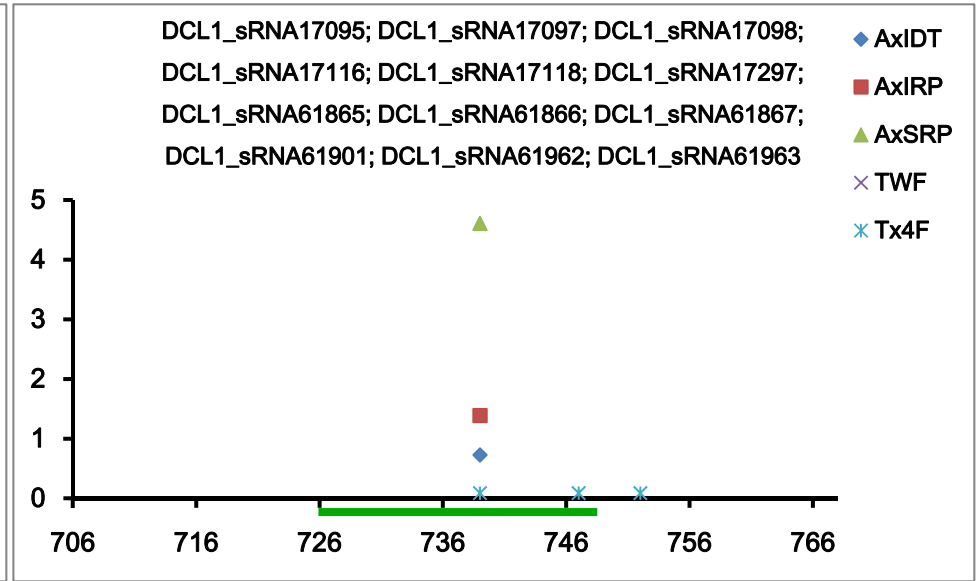



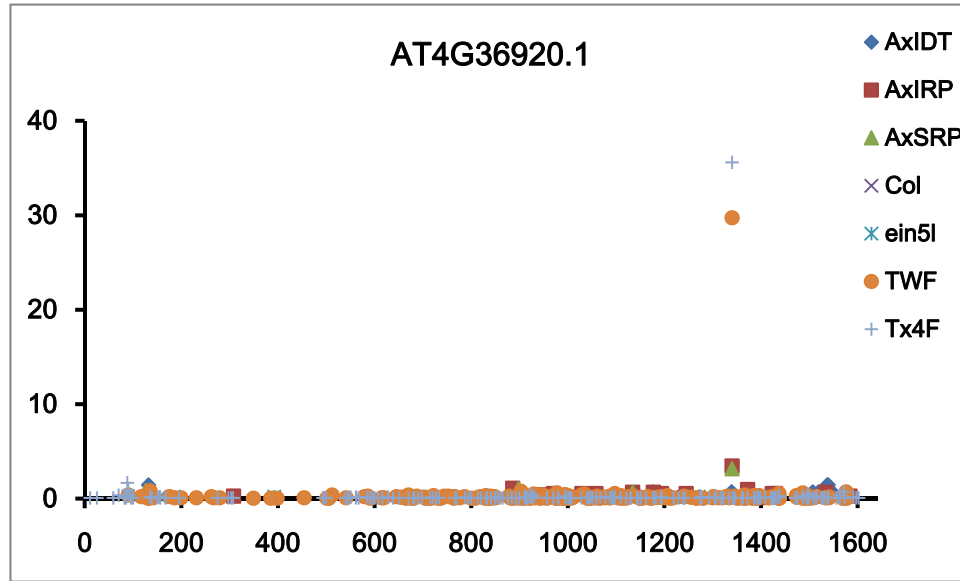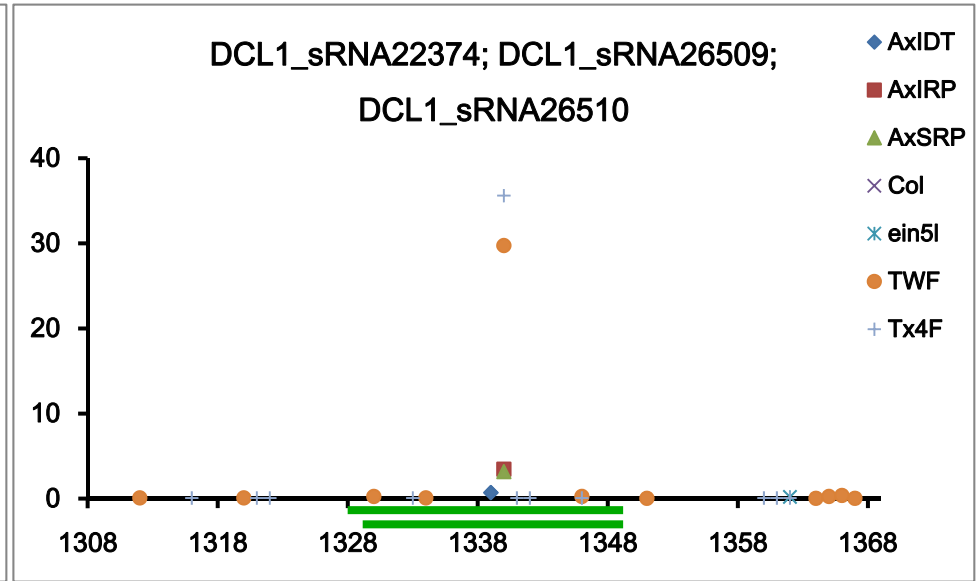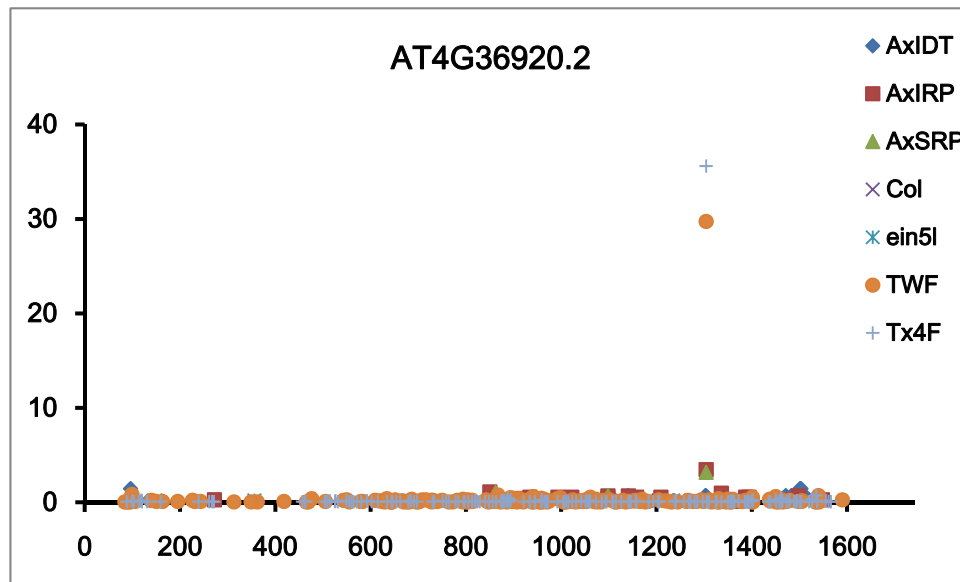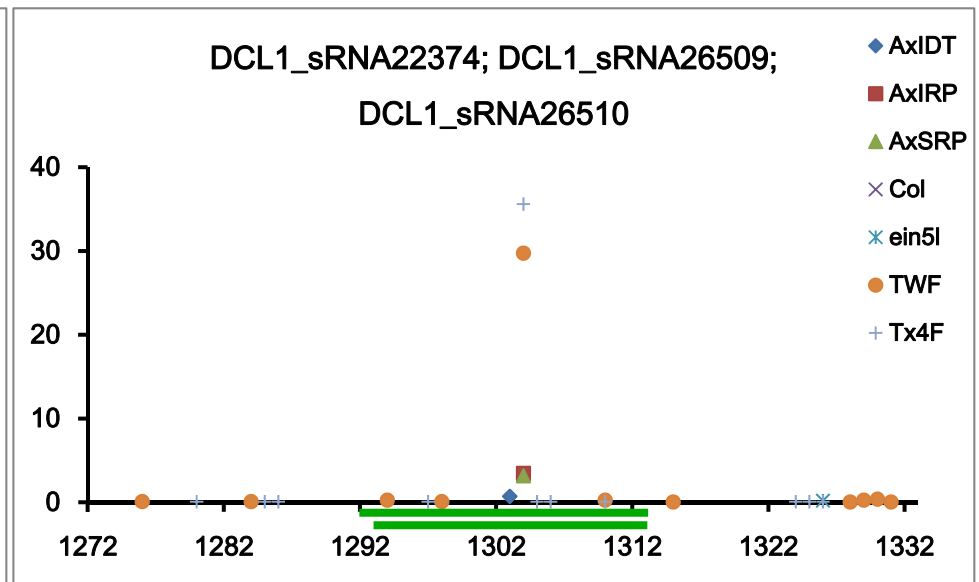

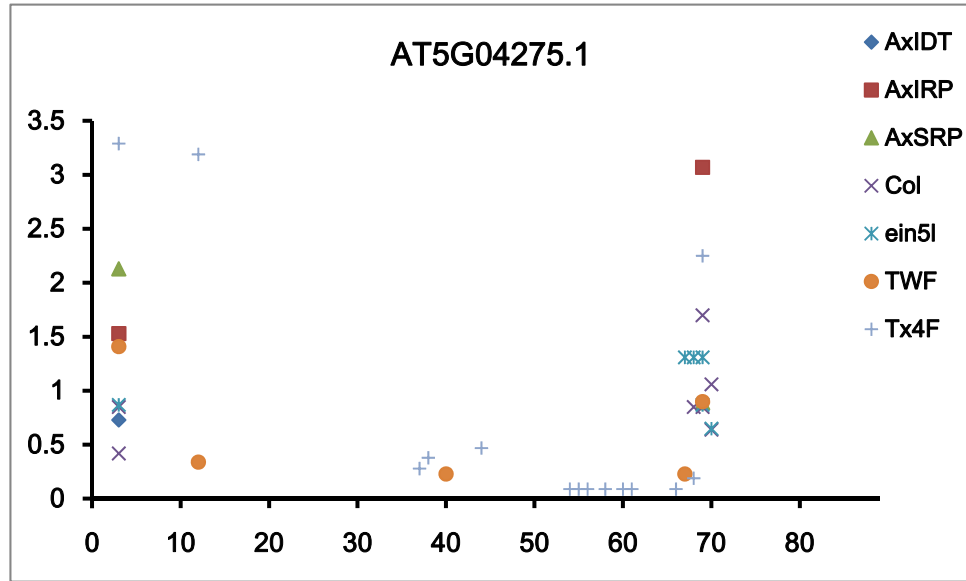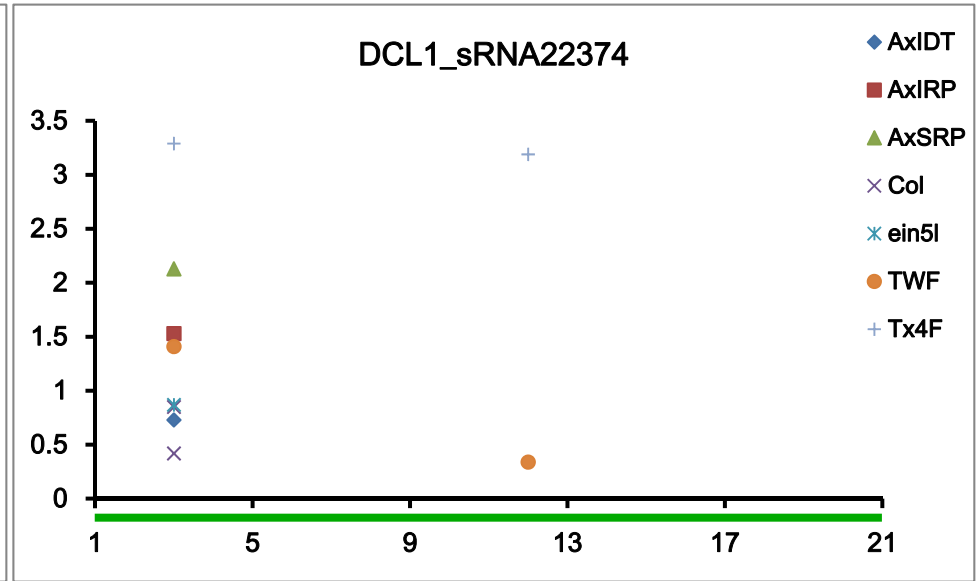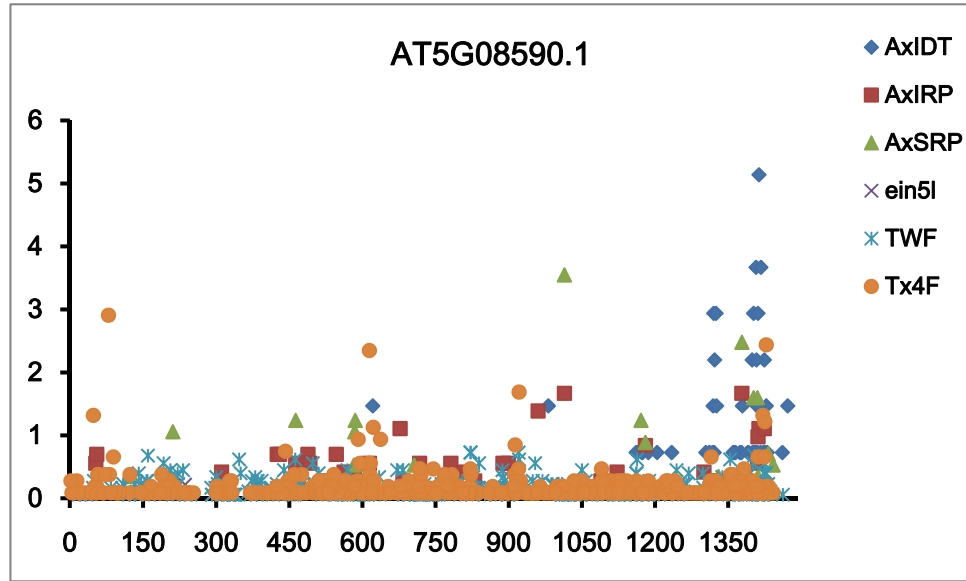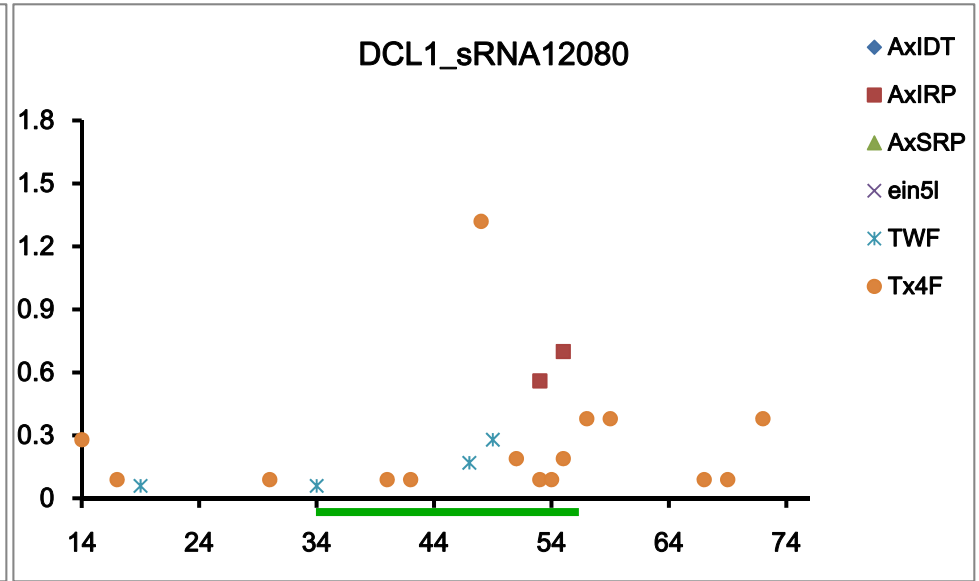



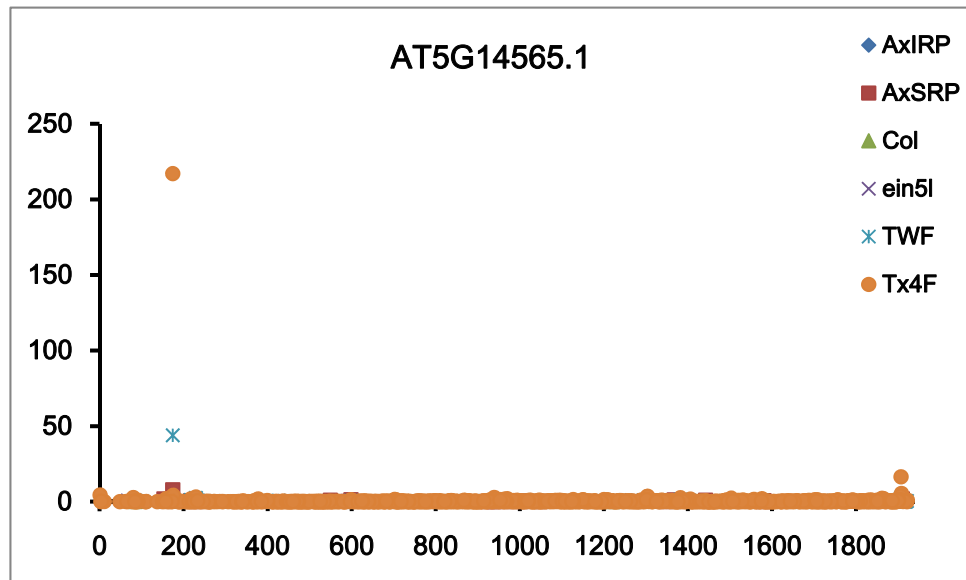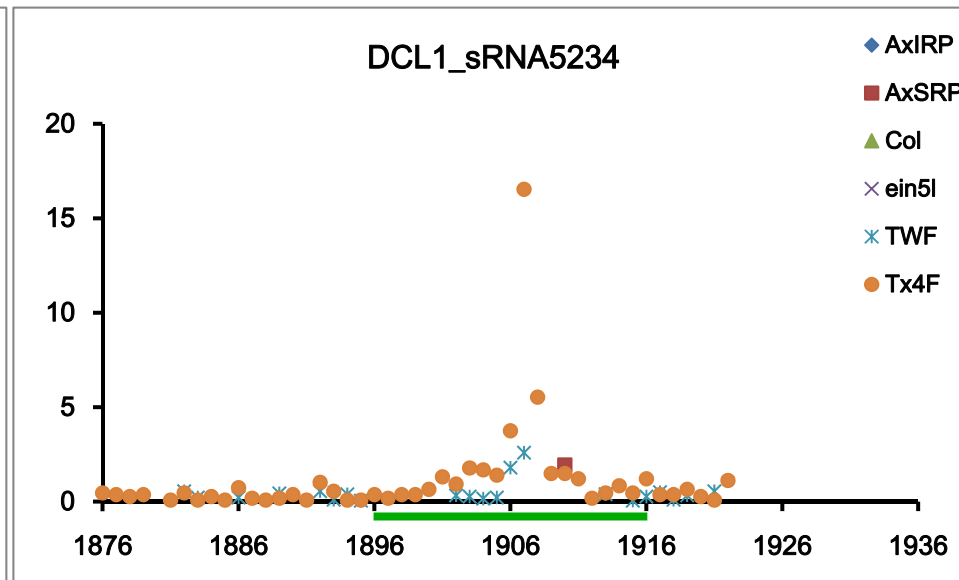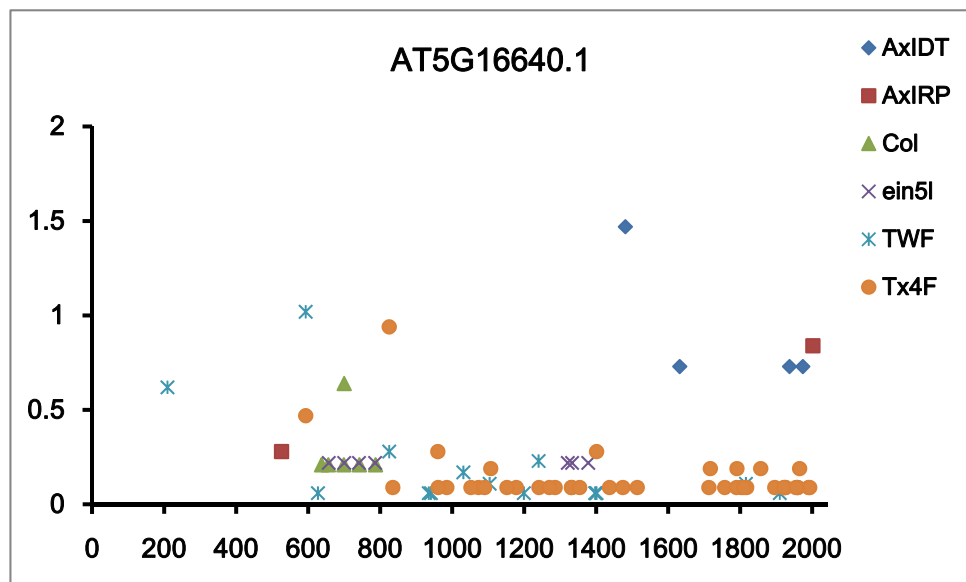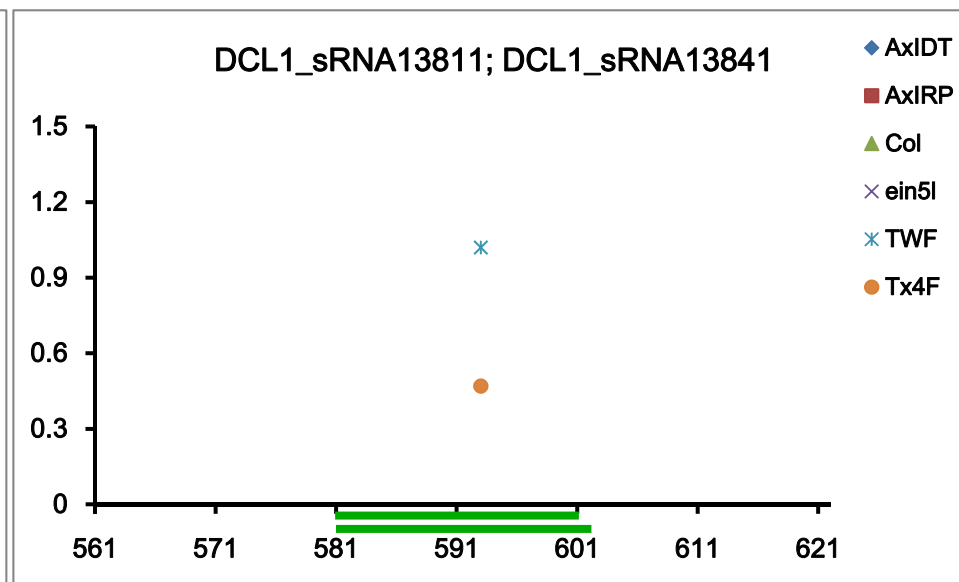

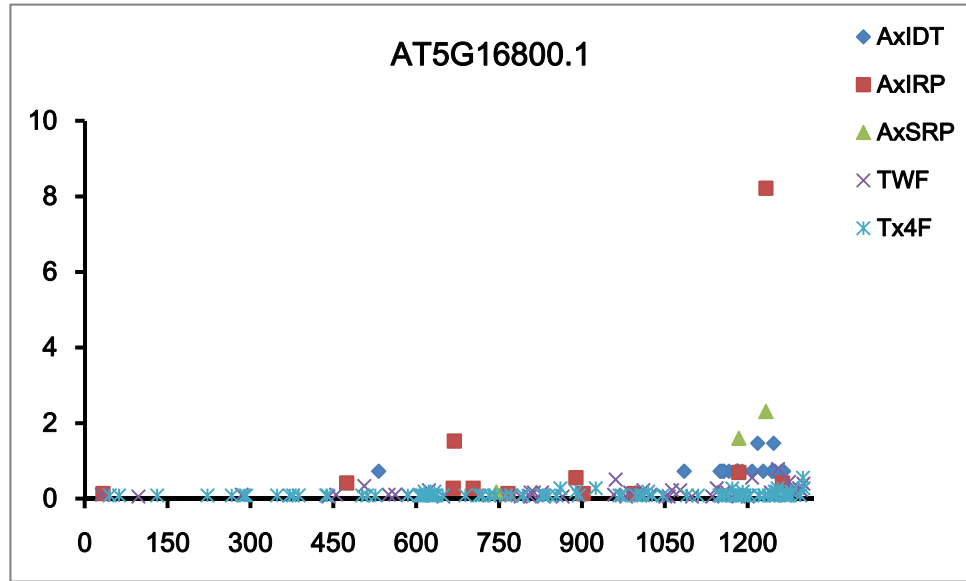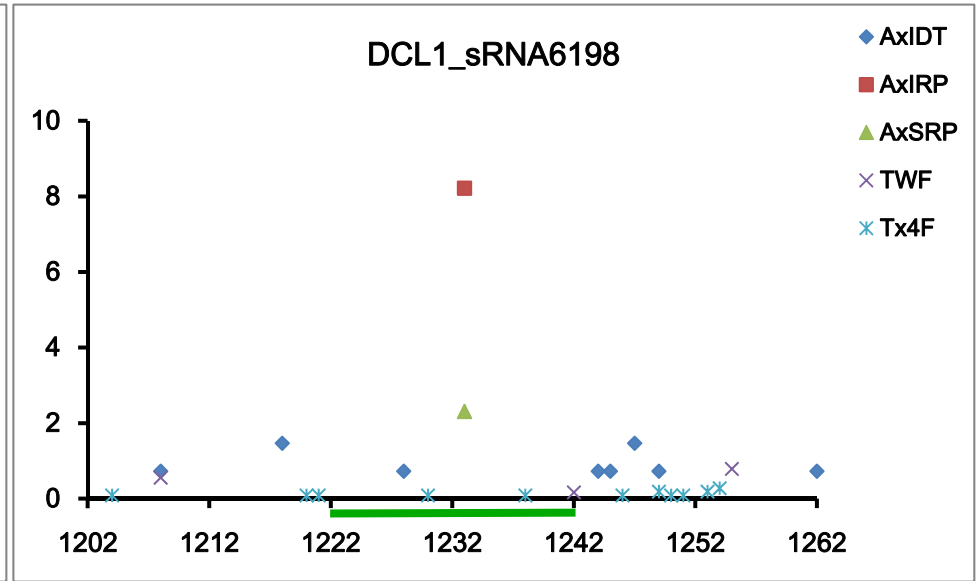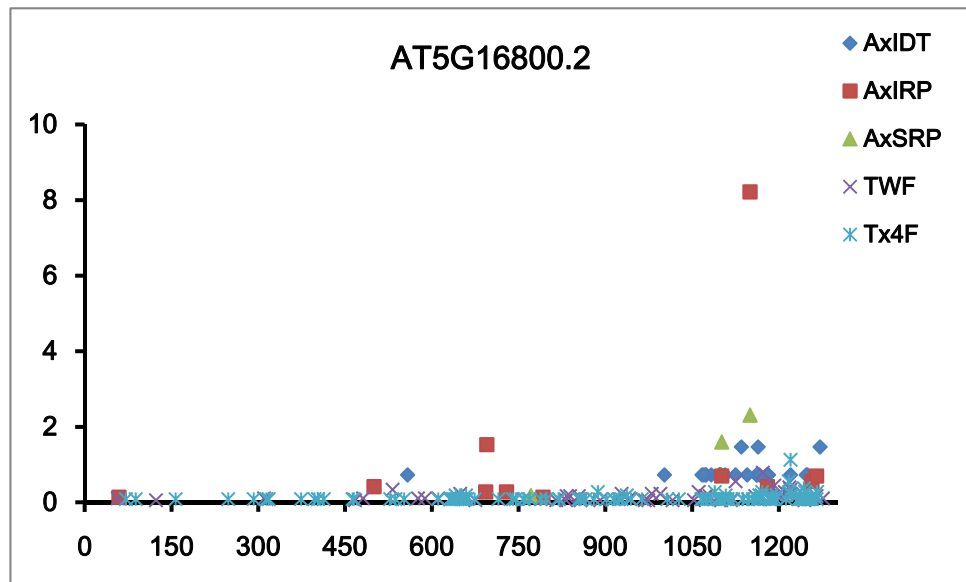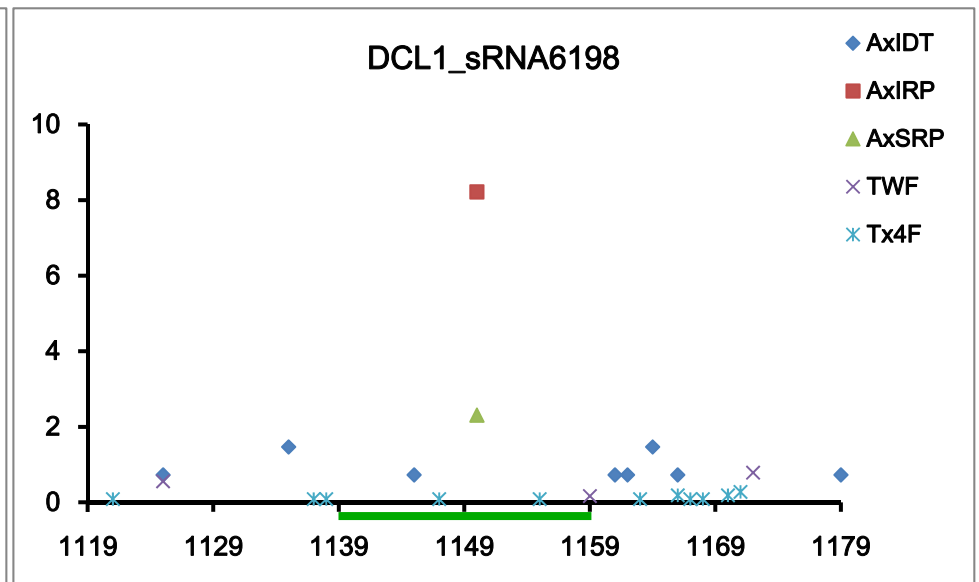



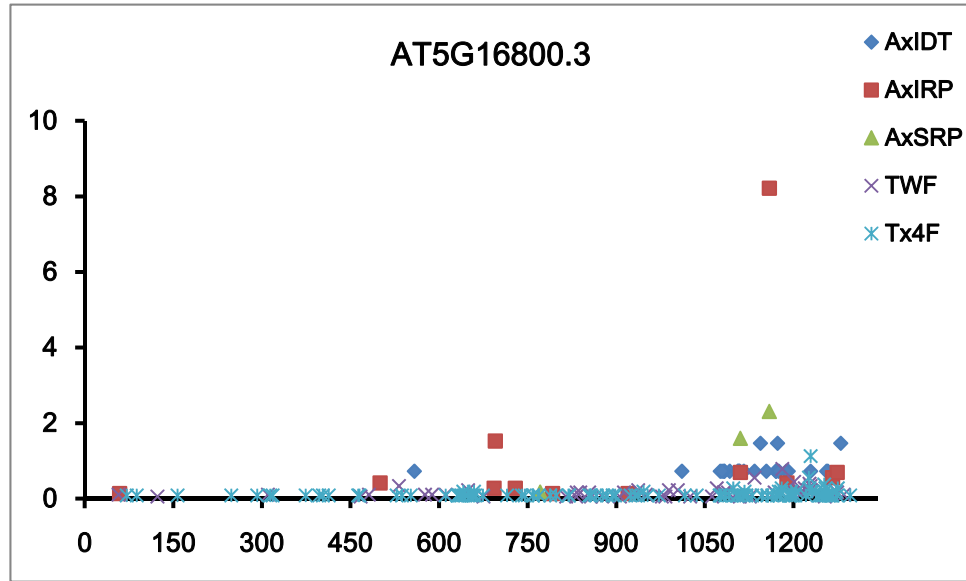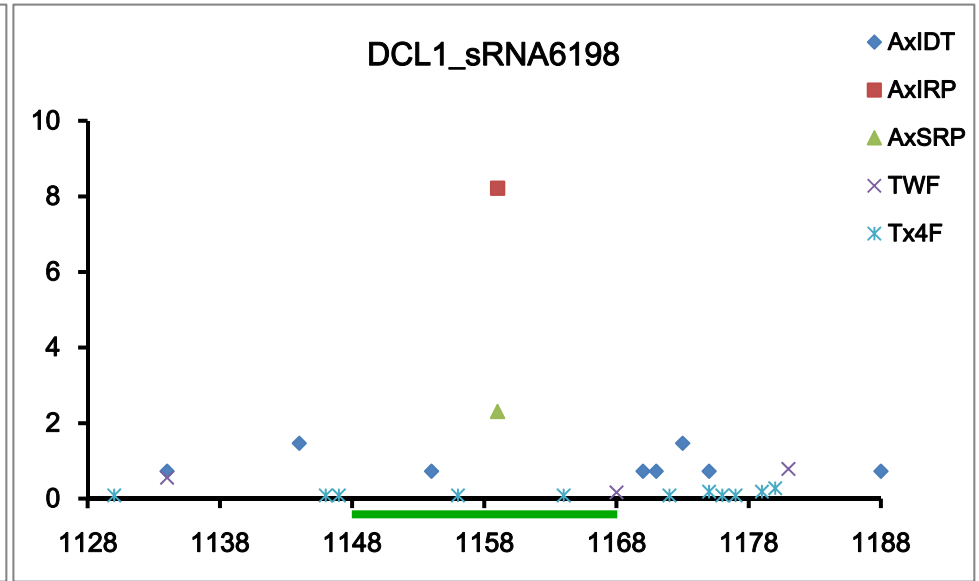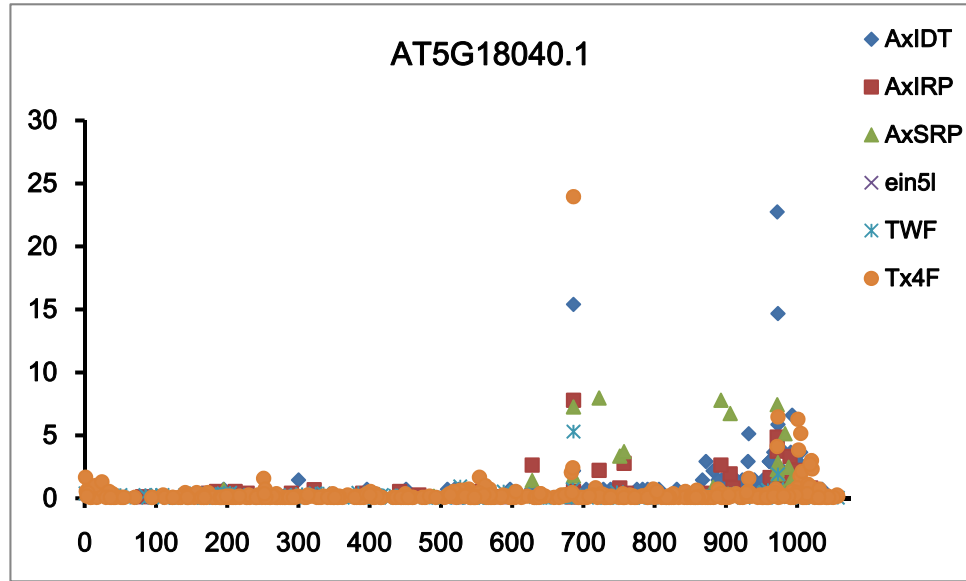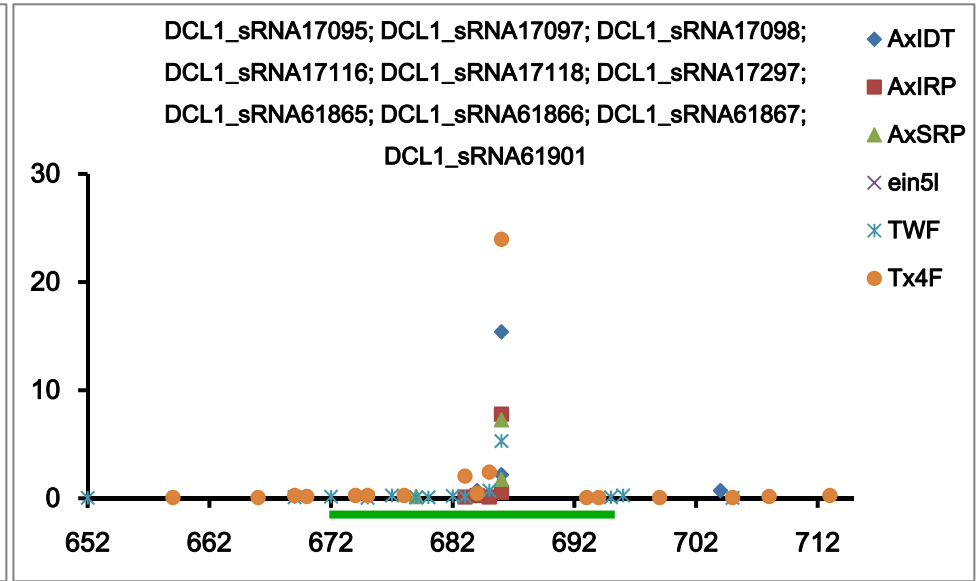

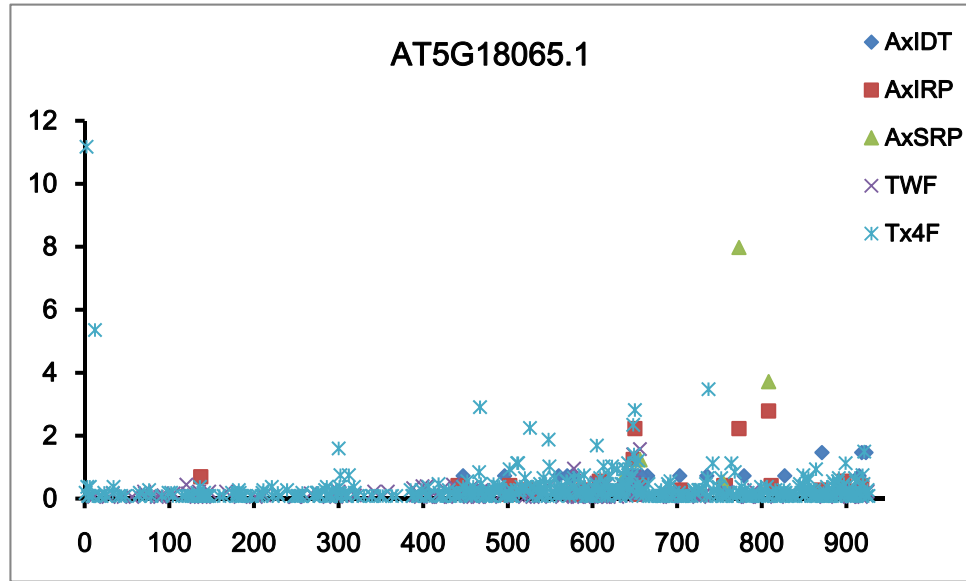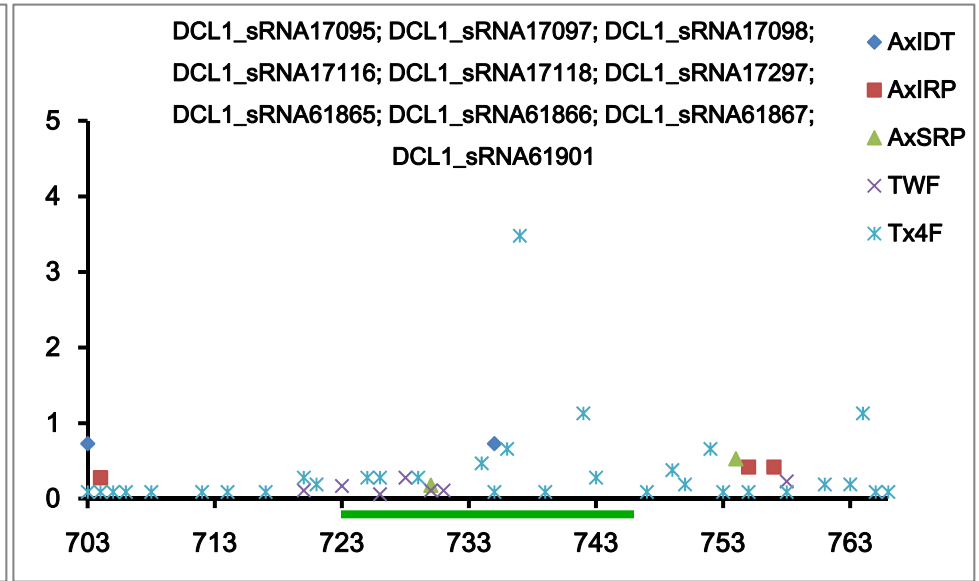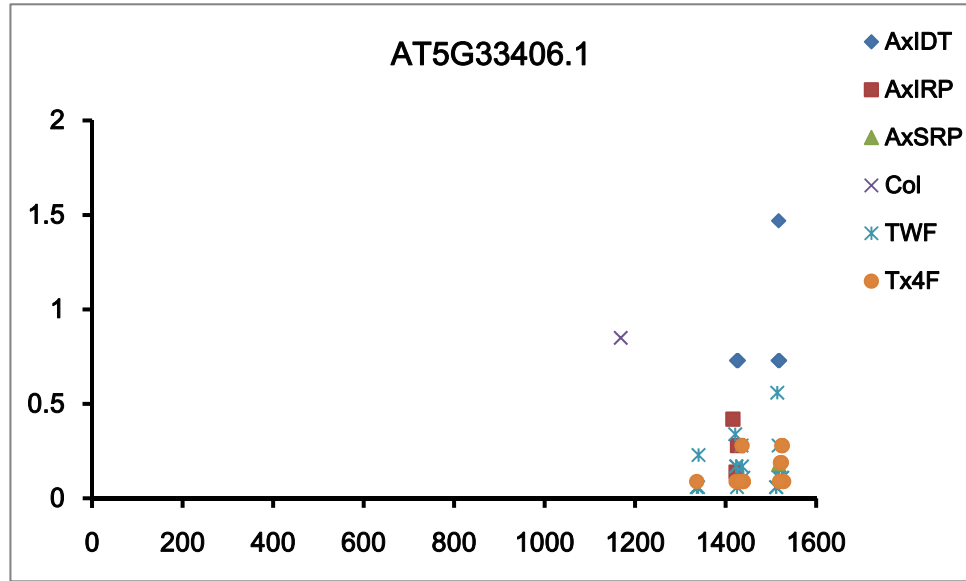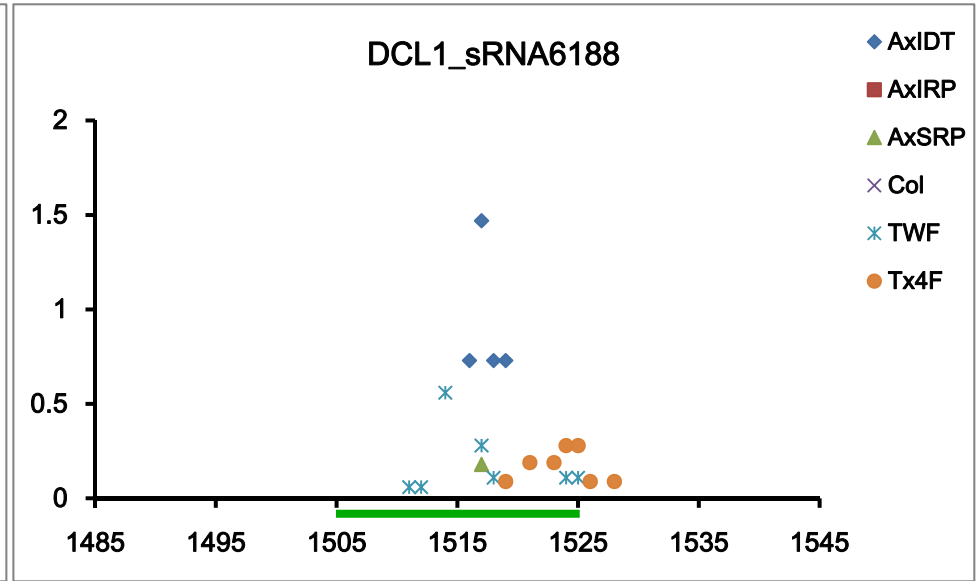

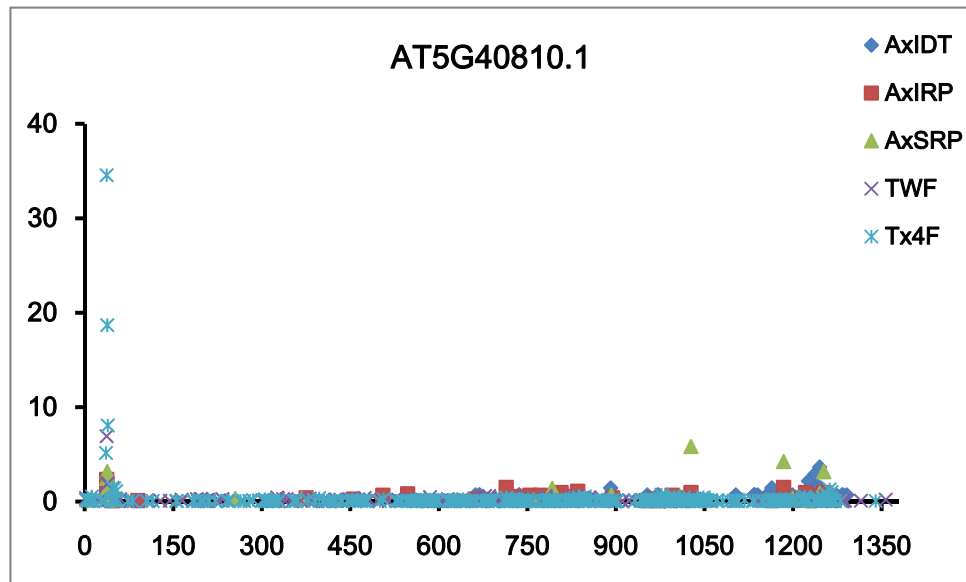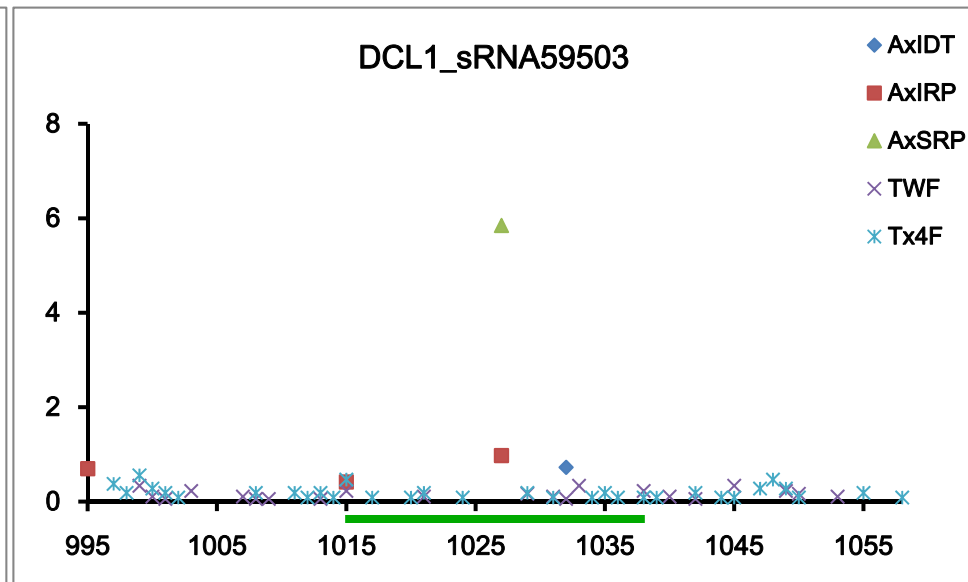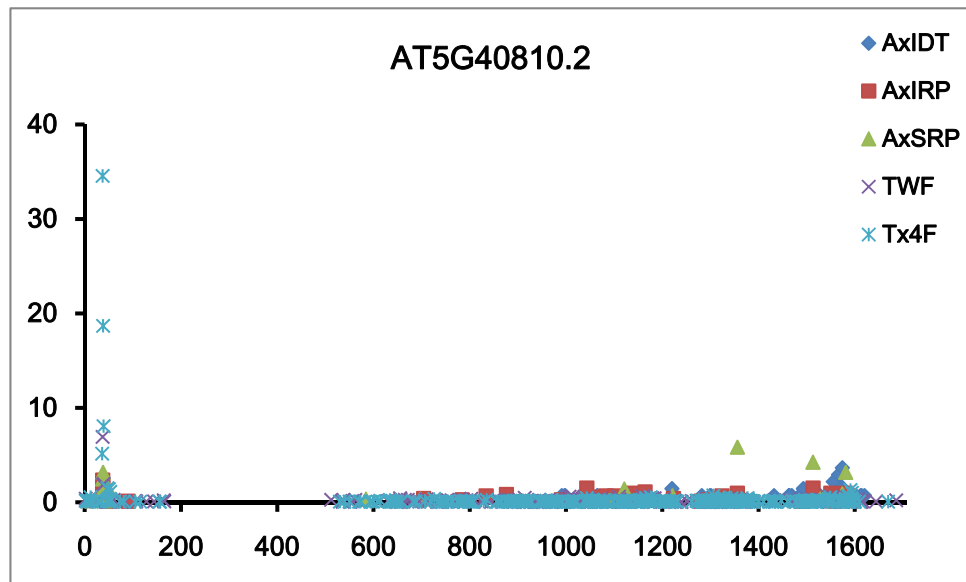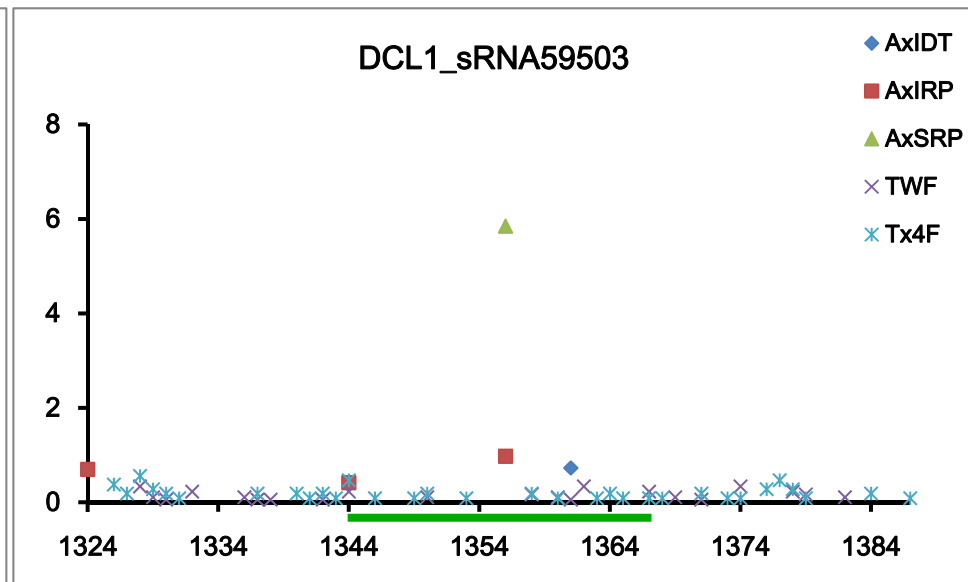

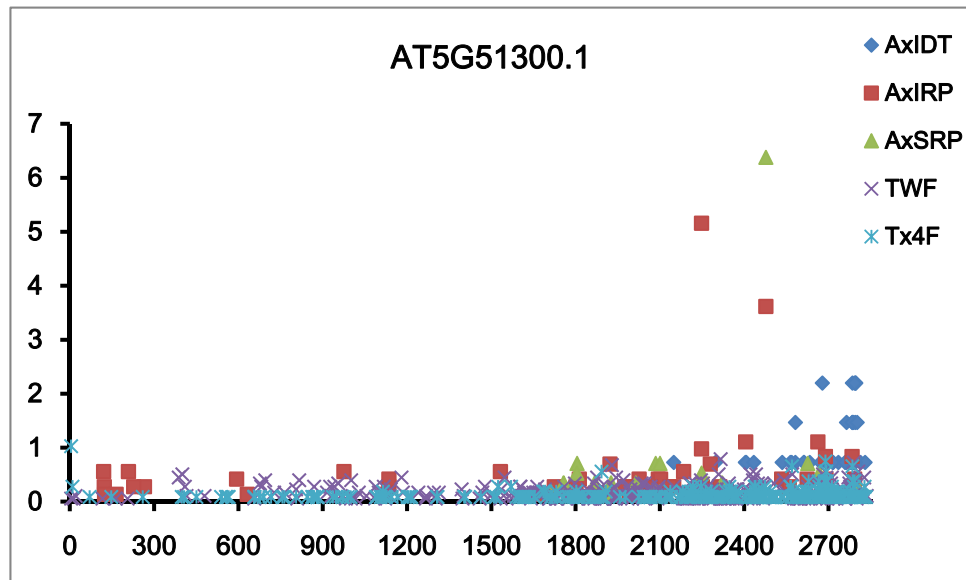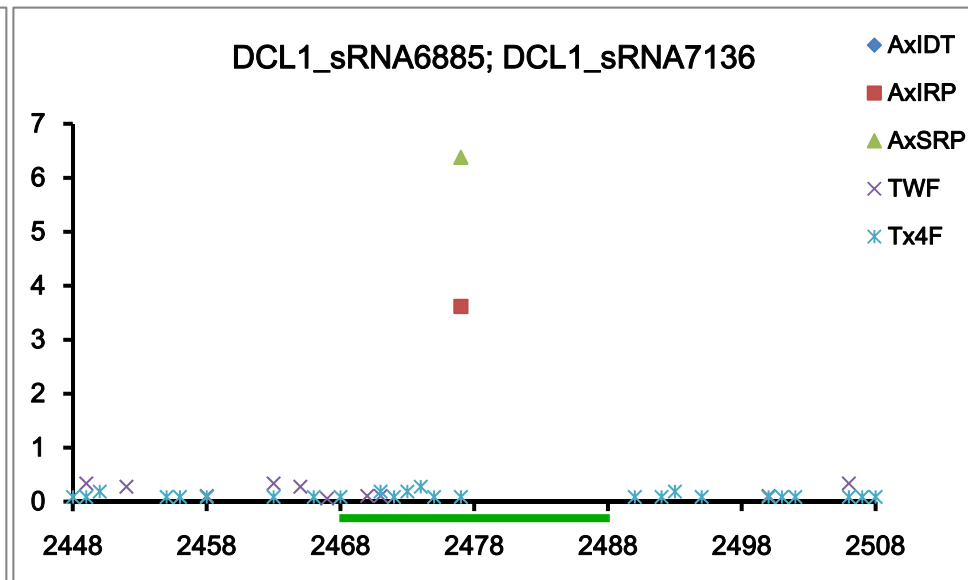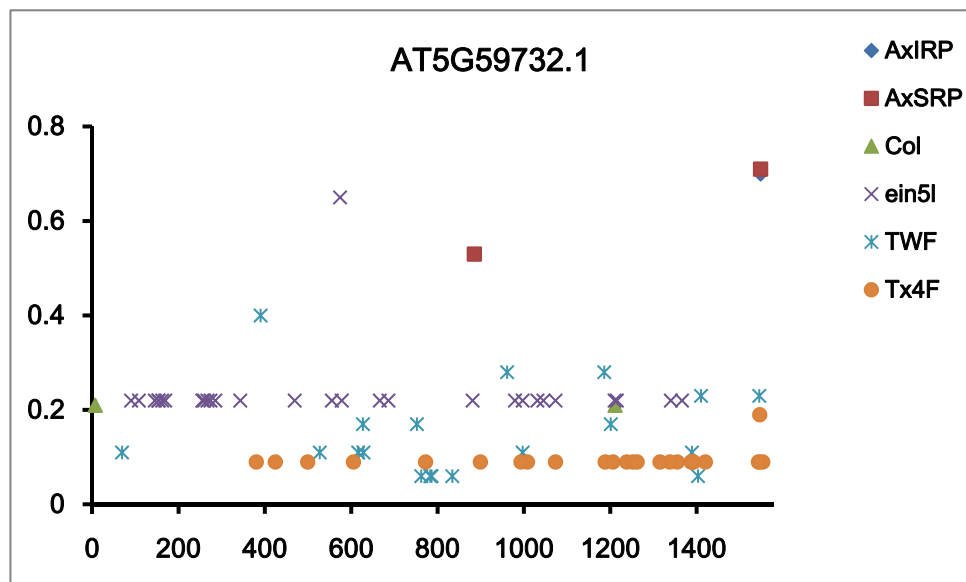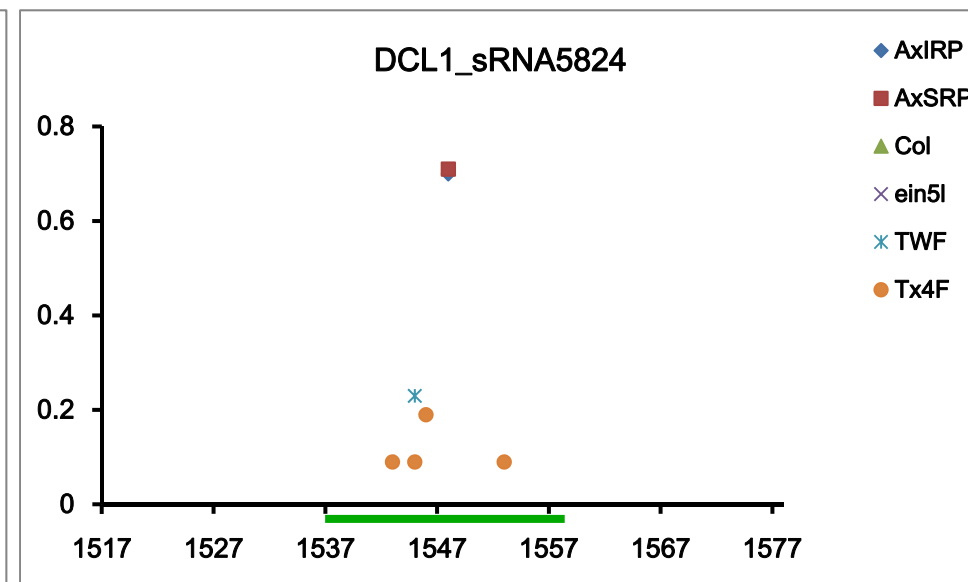

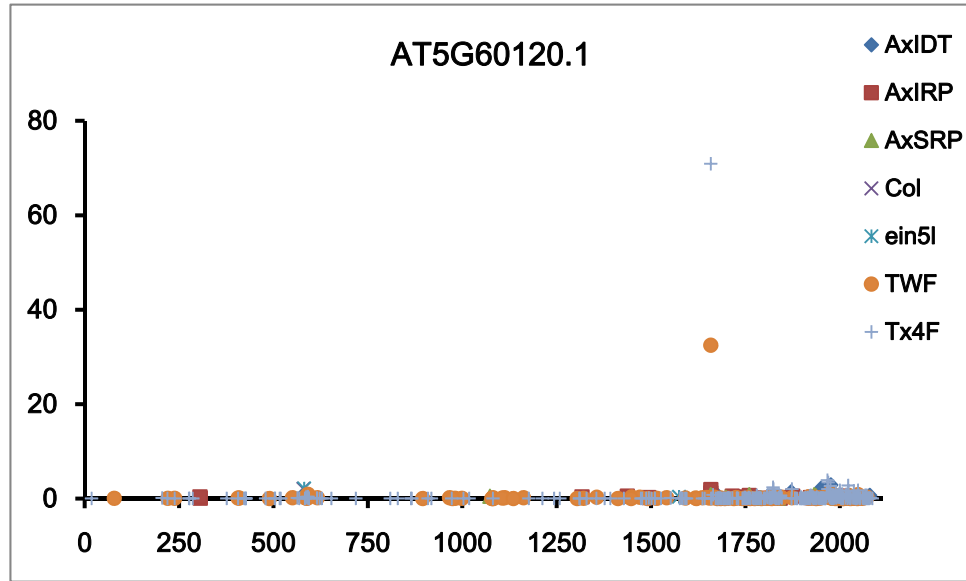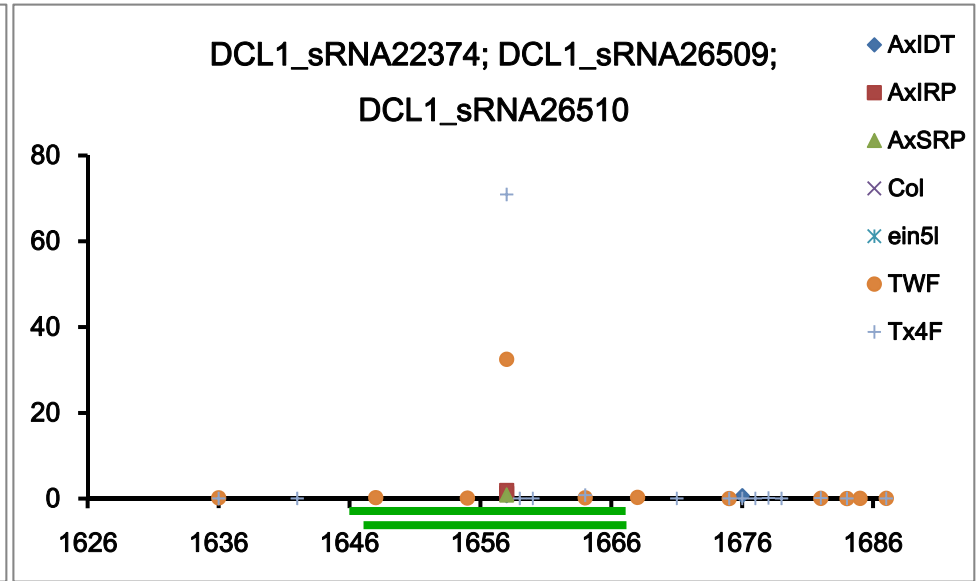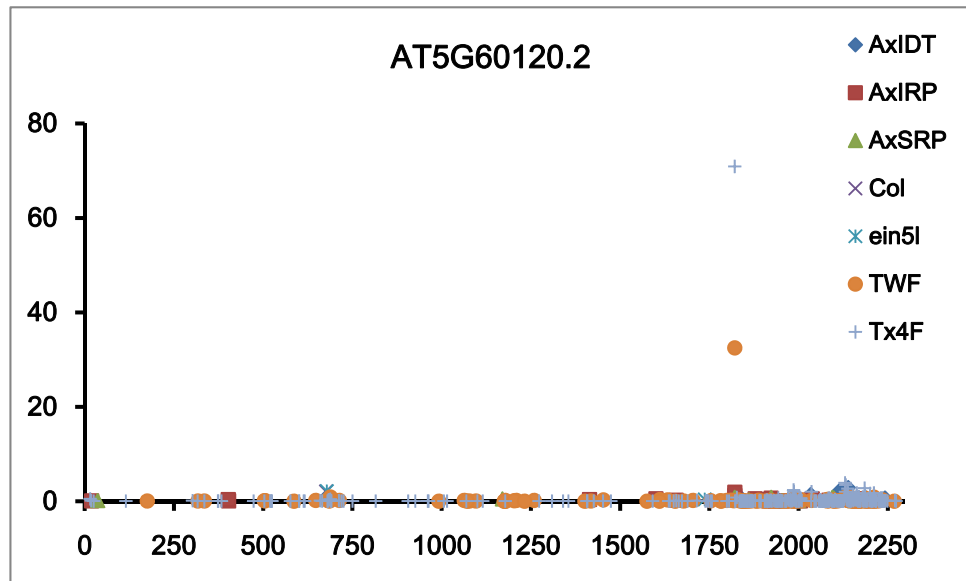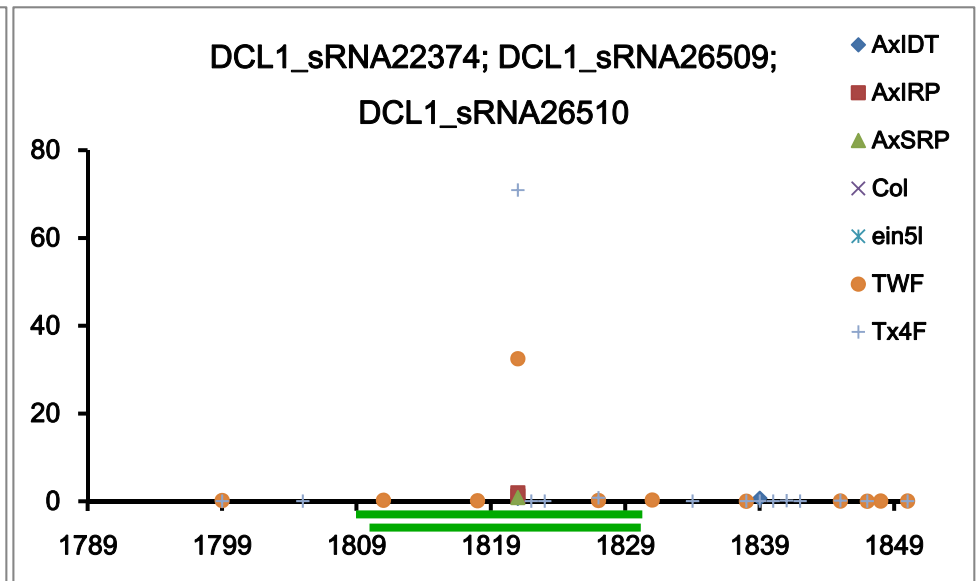

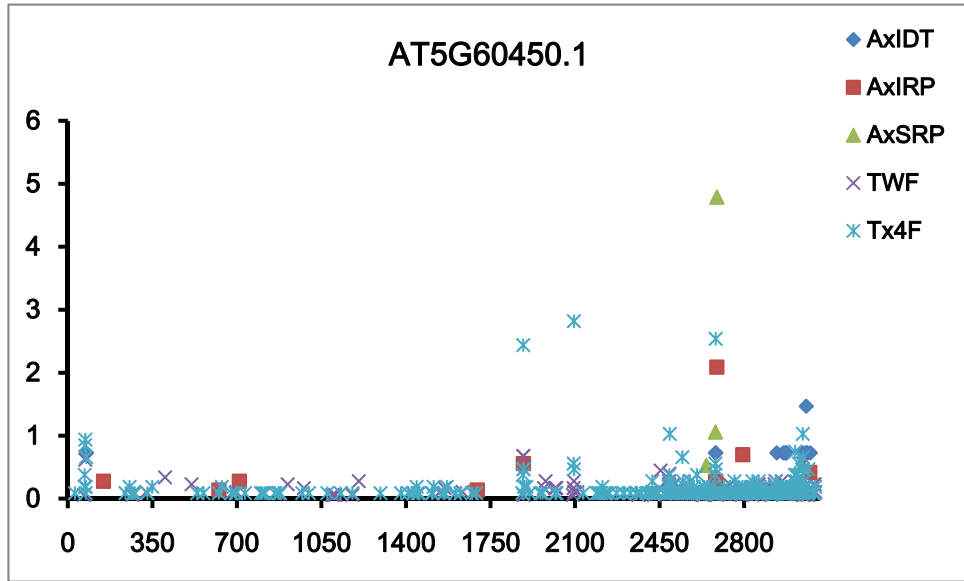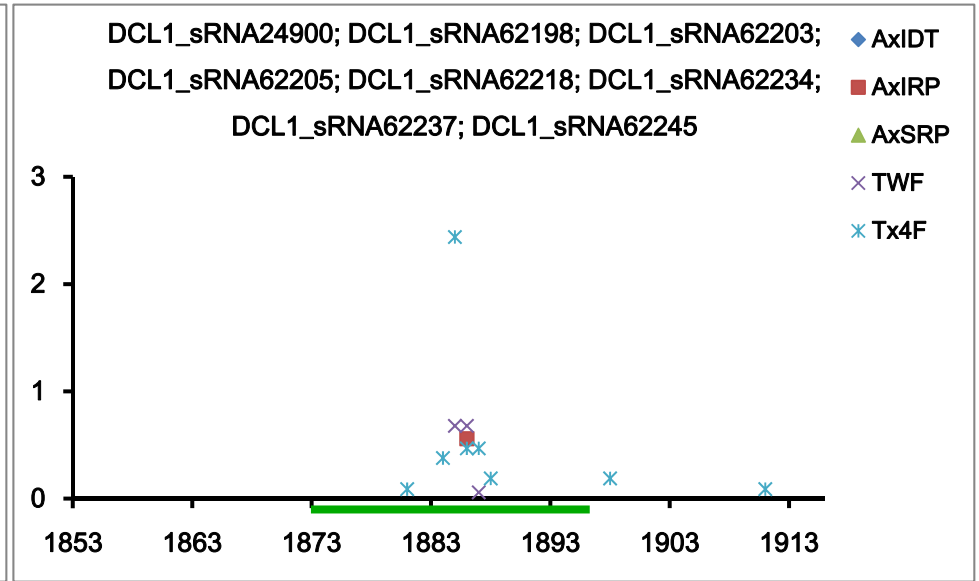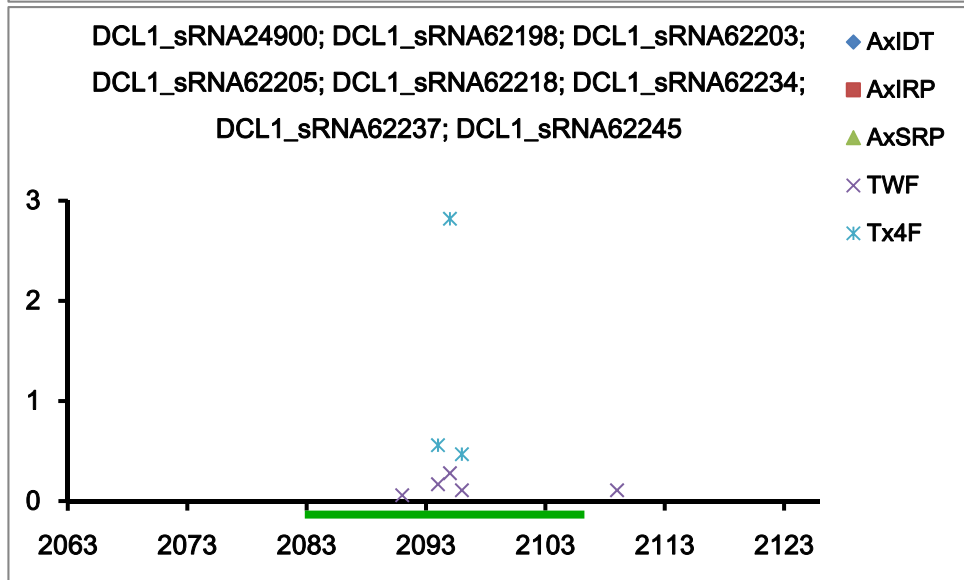

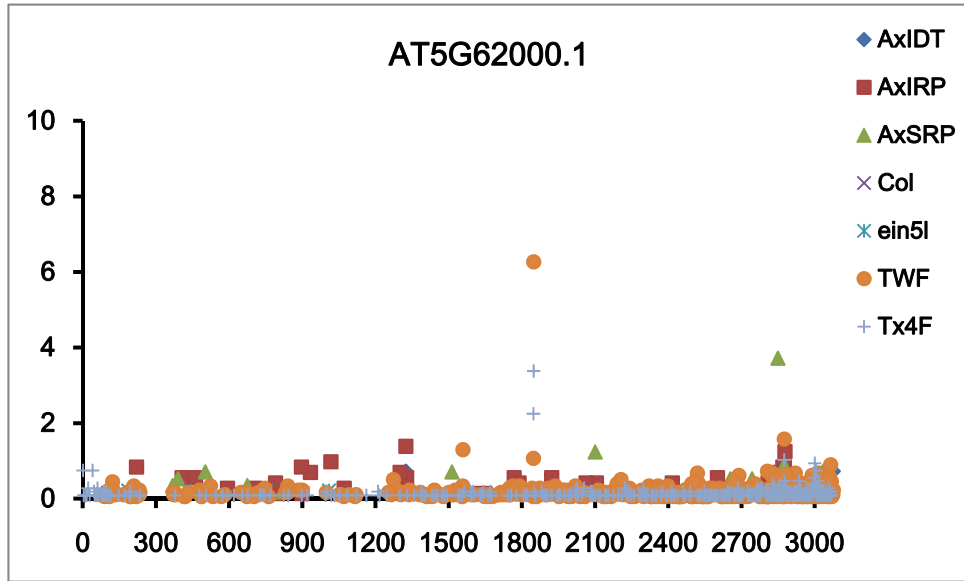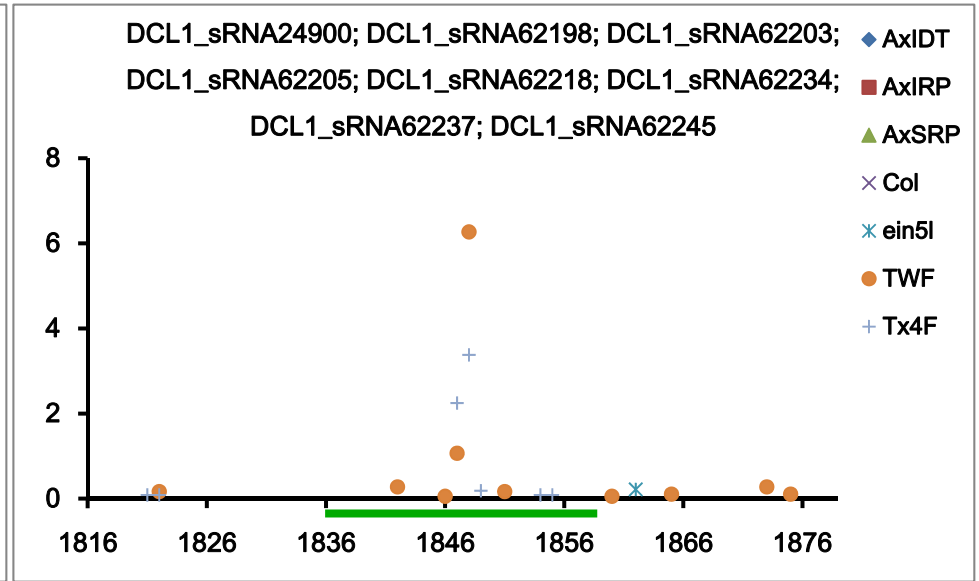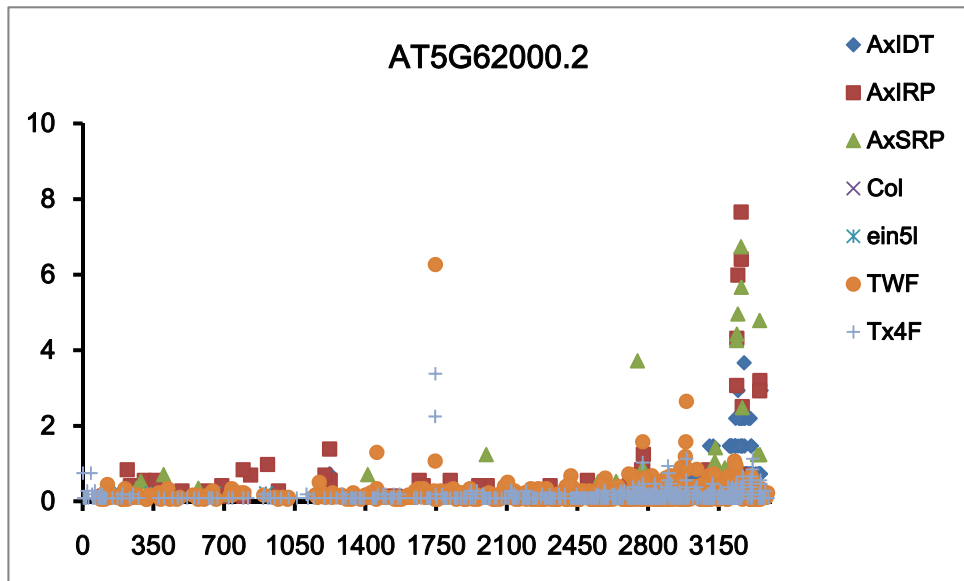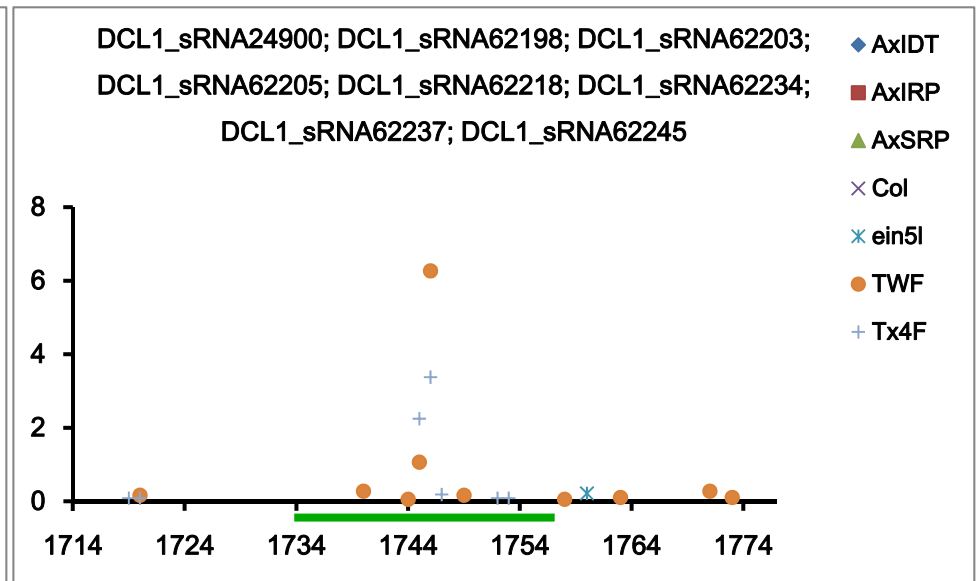

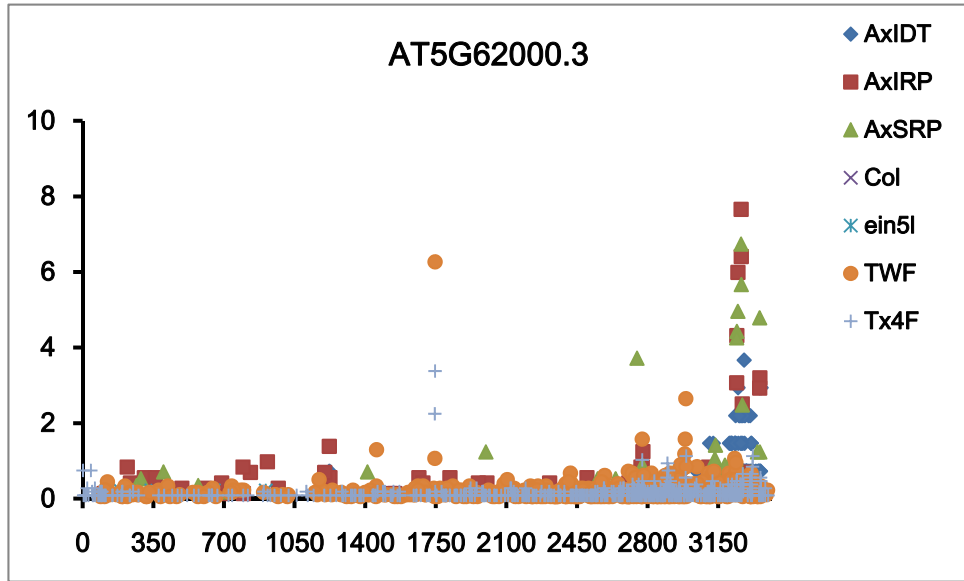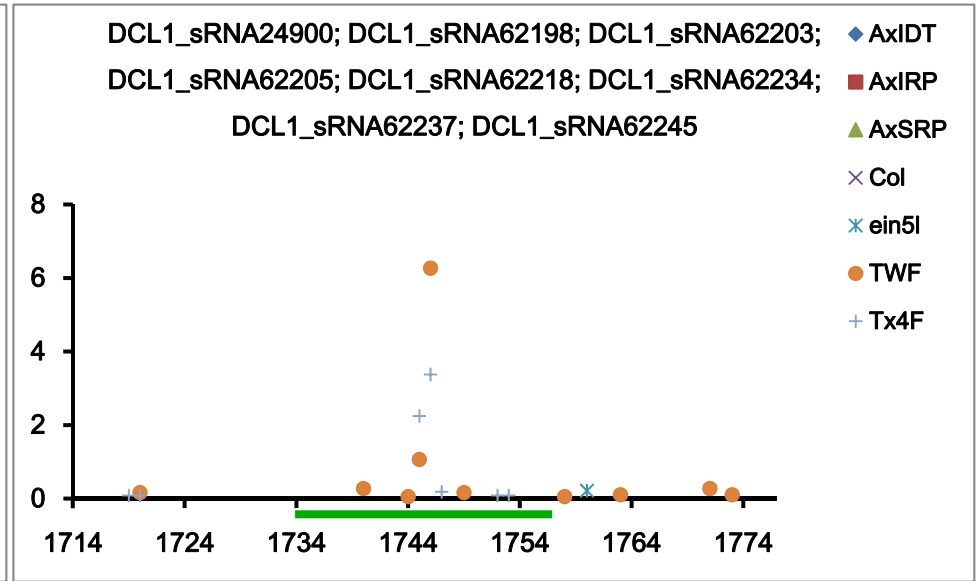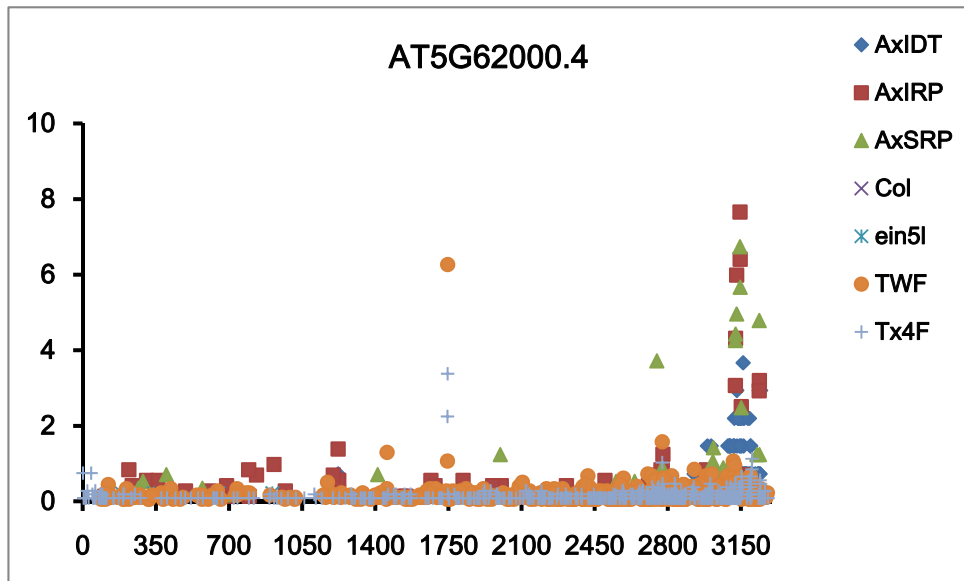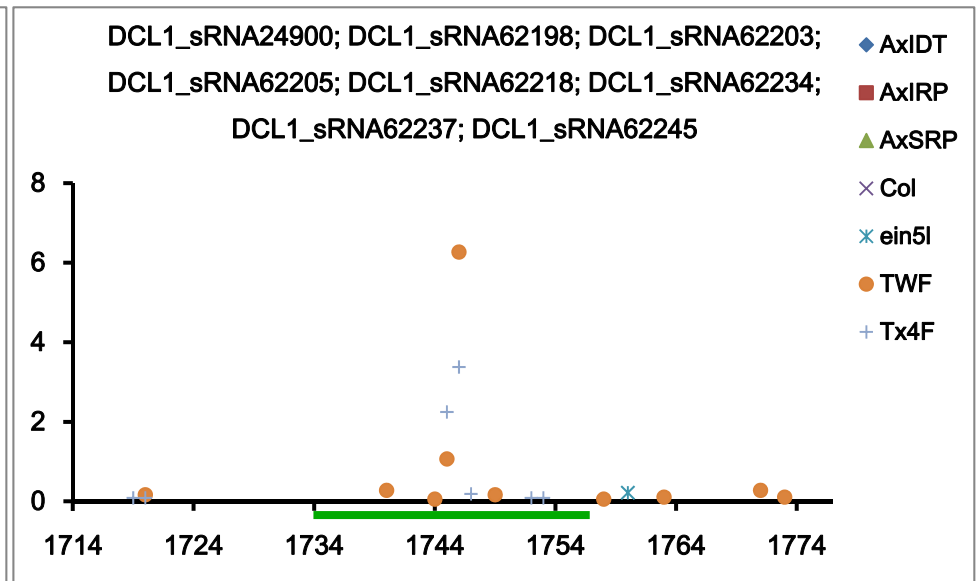



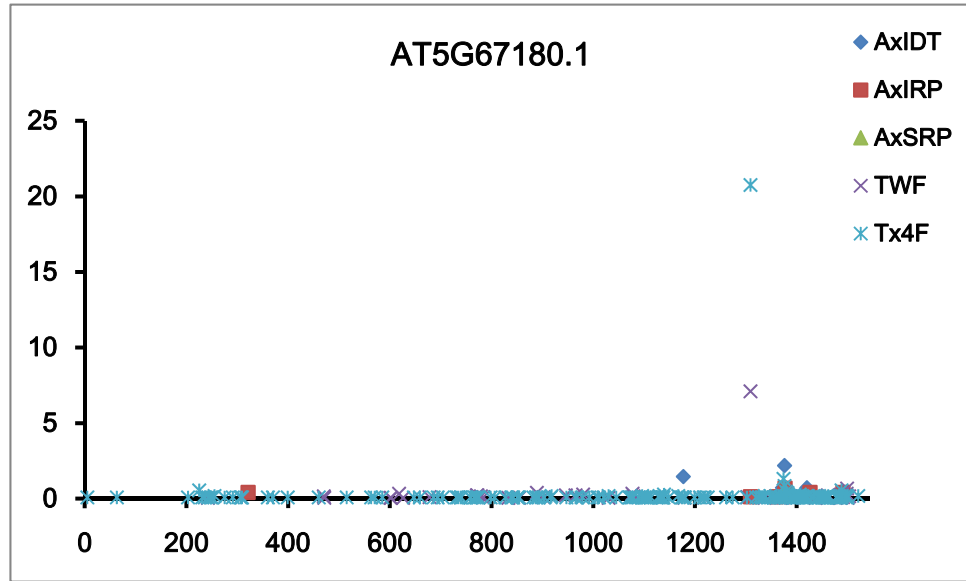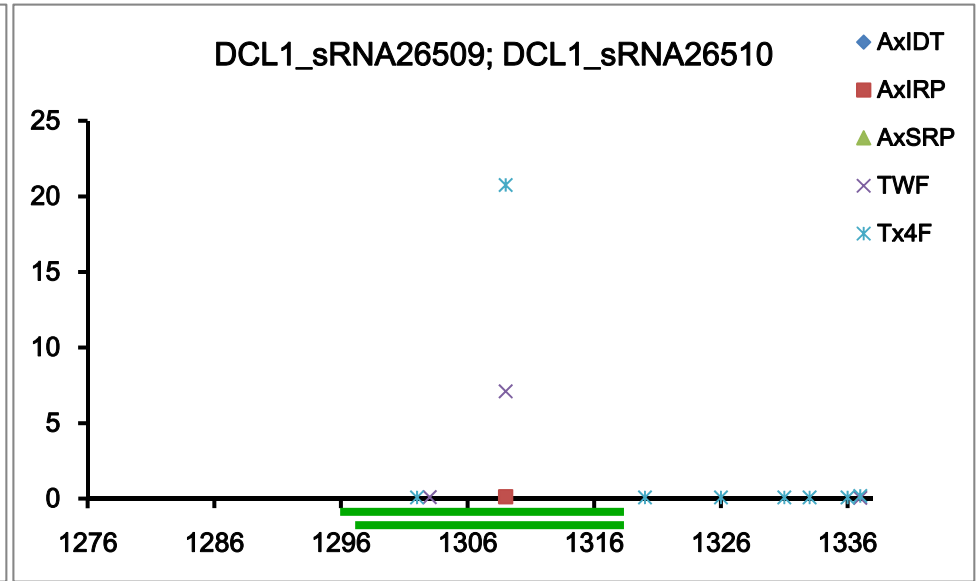

Supplement: rna-11-373-s04.pdf [file rna-11-373-s04.pdf]

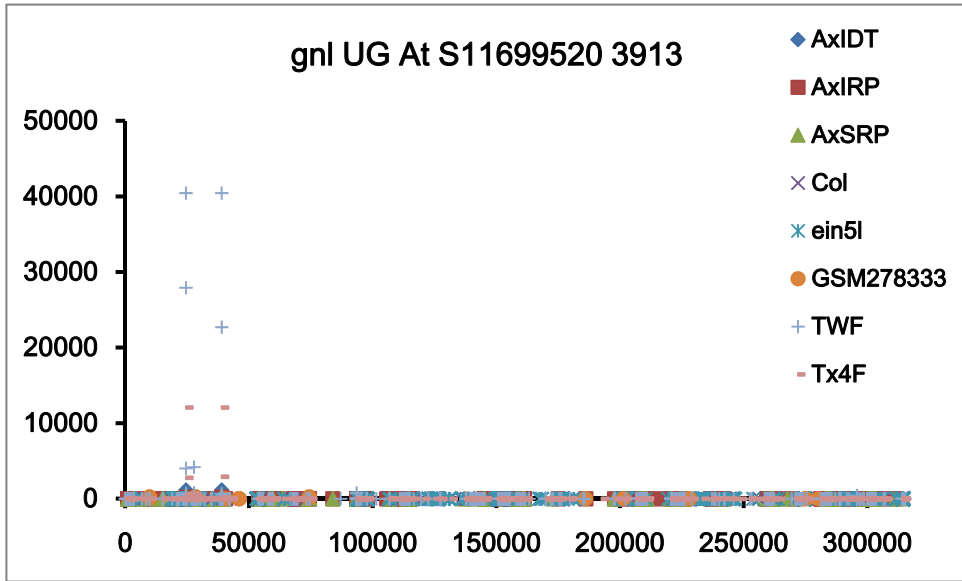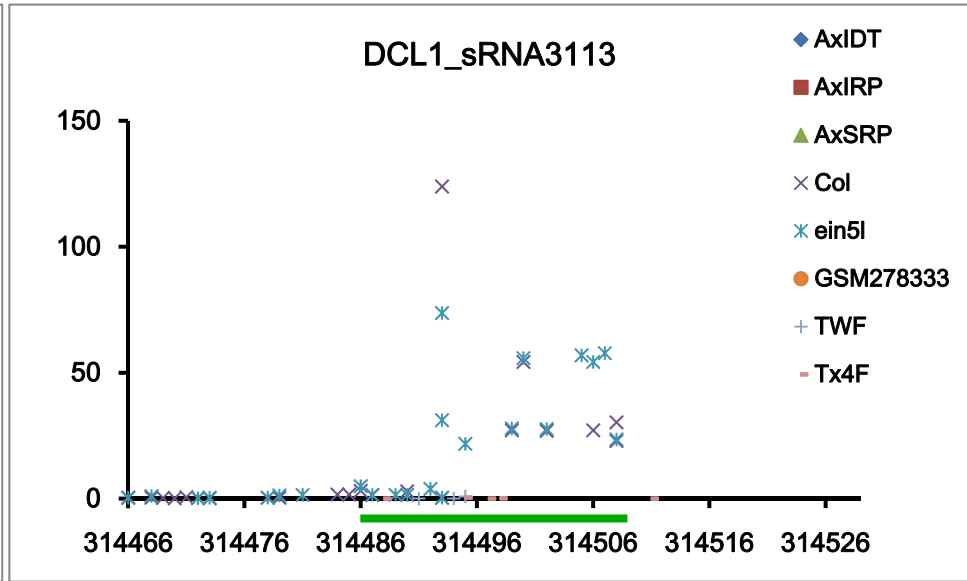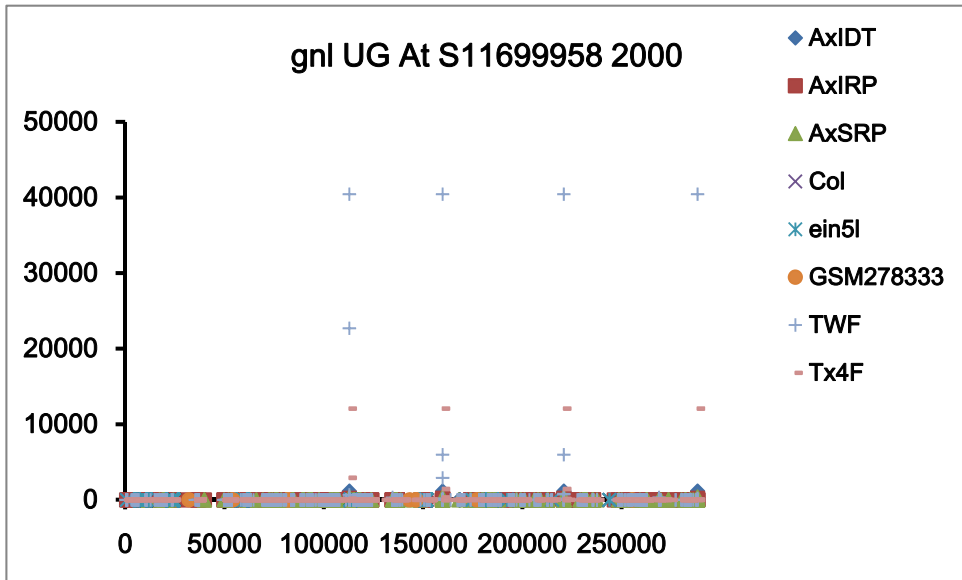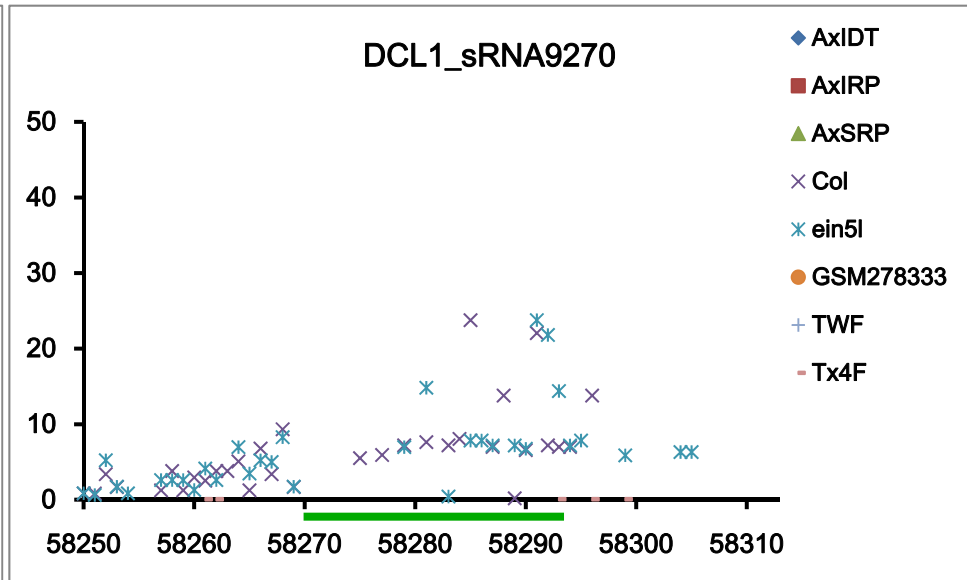

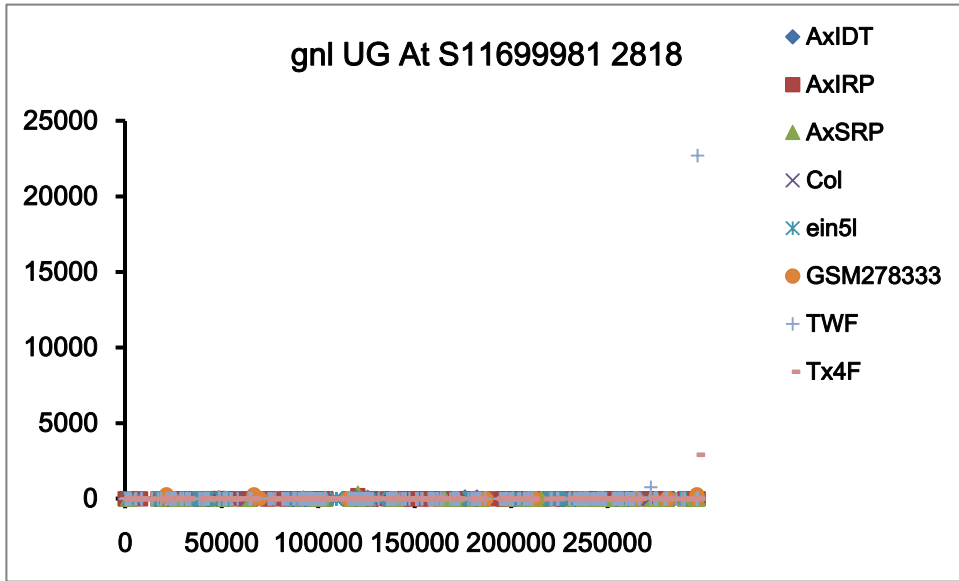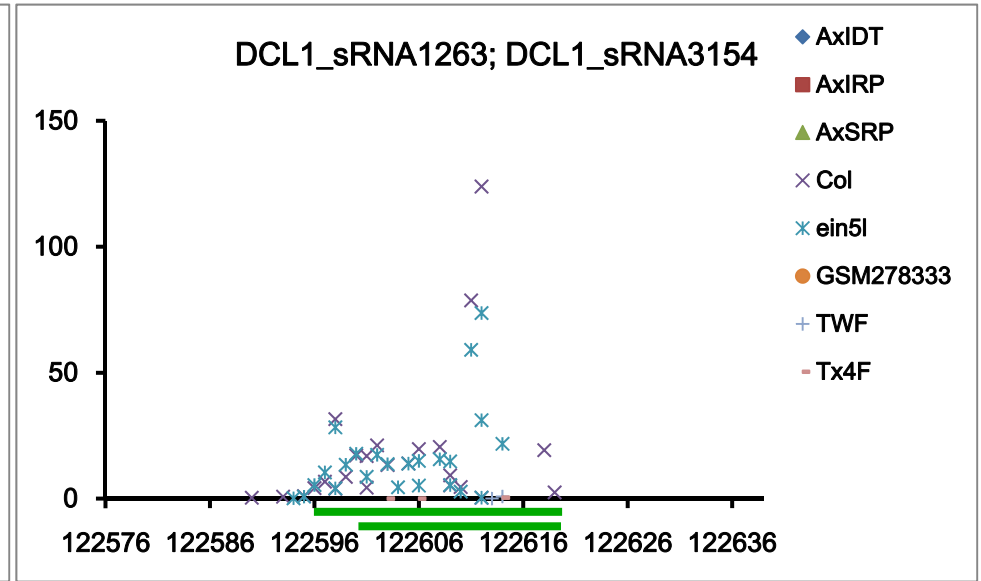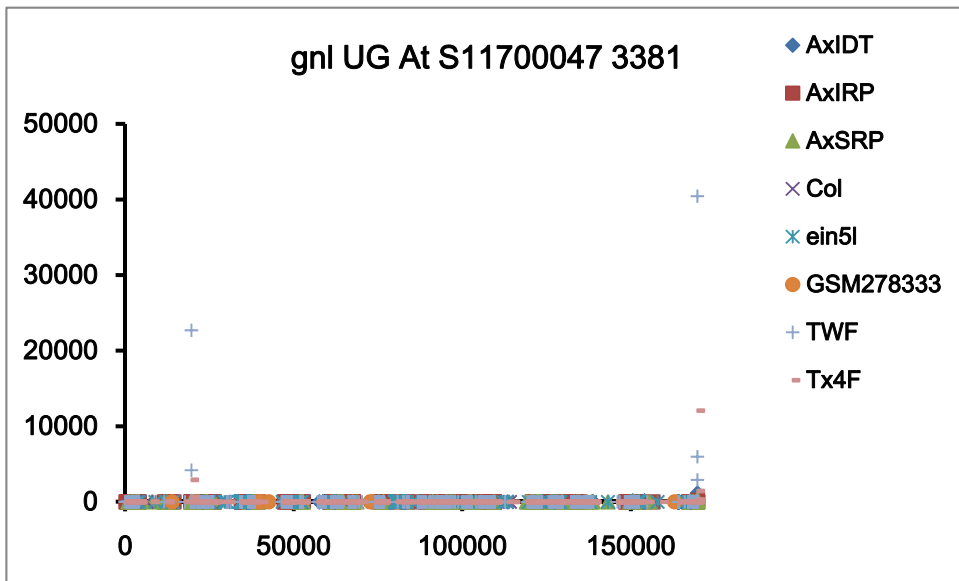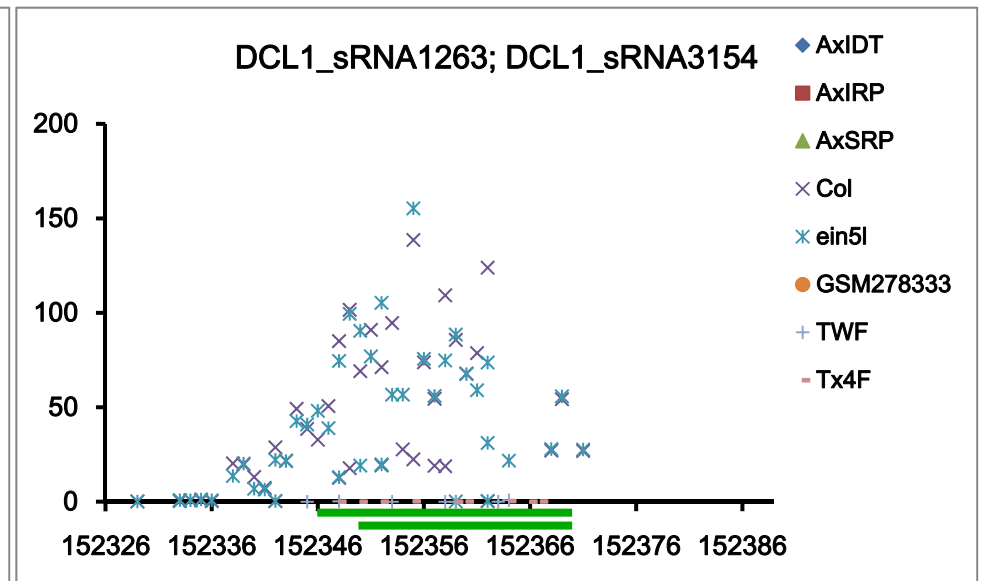

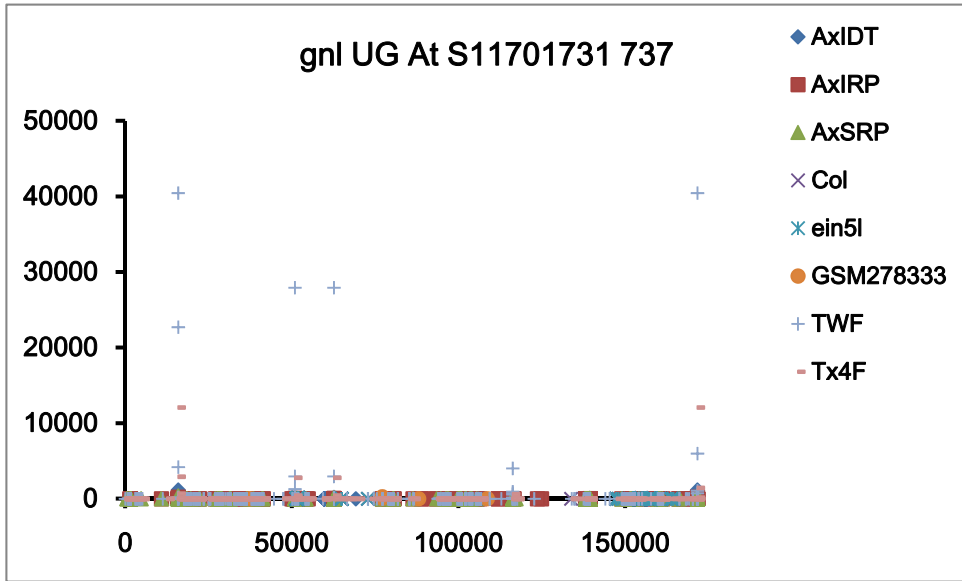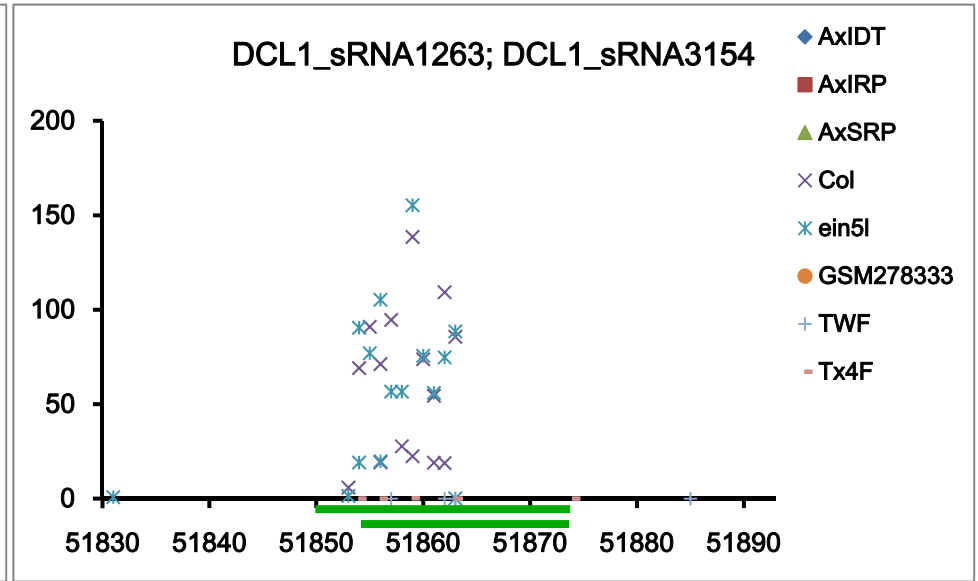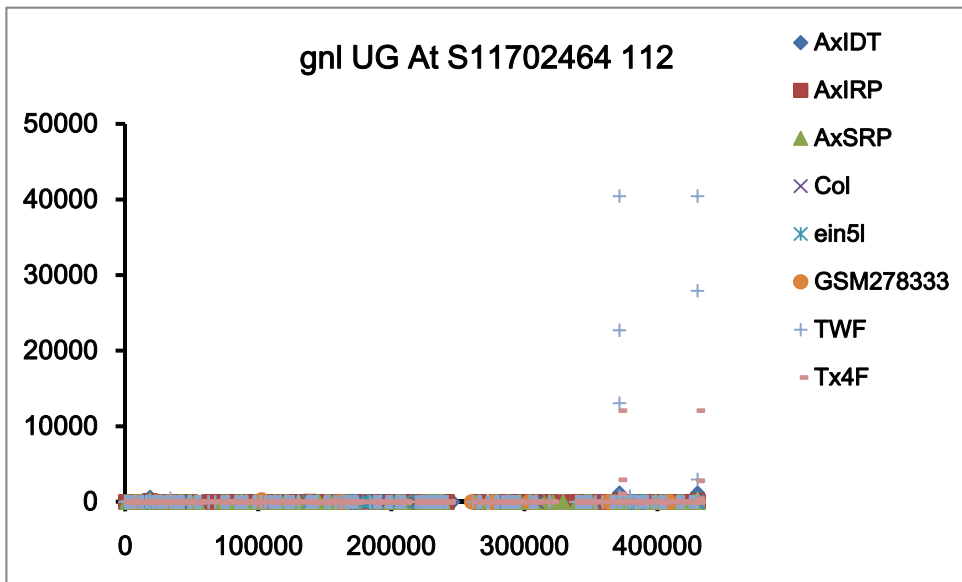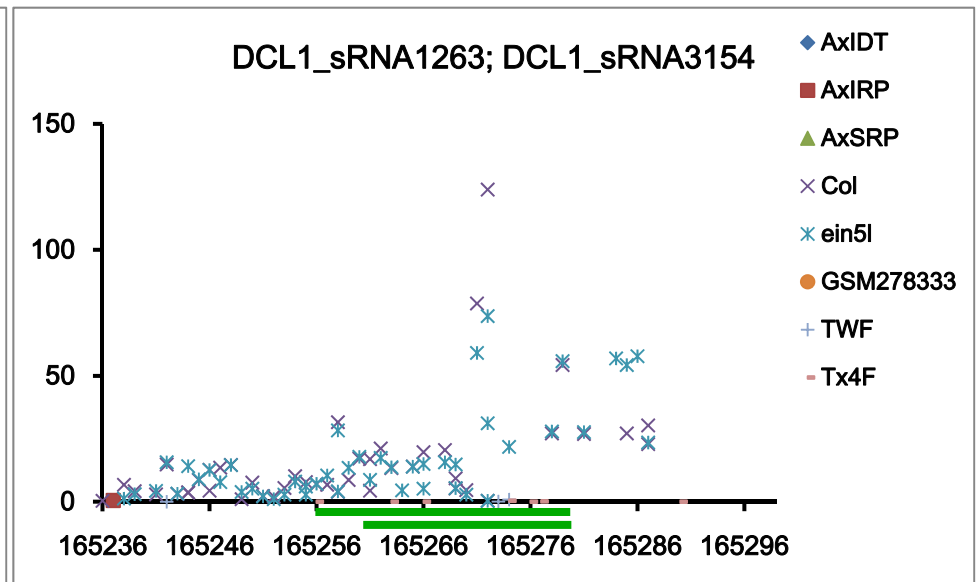

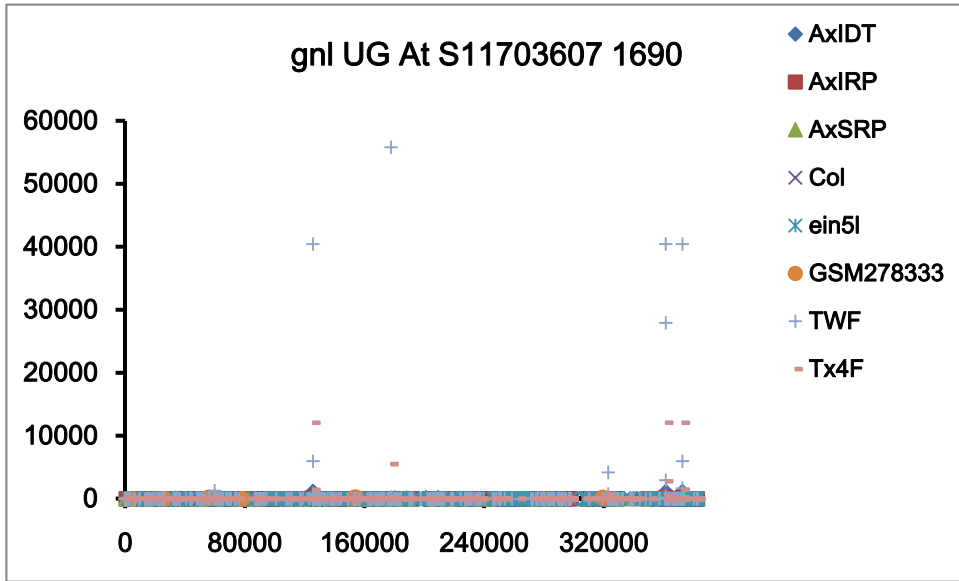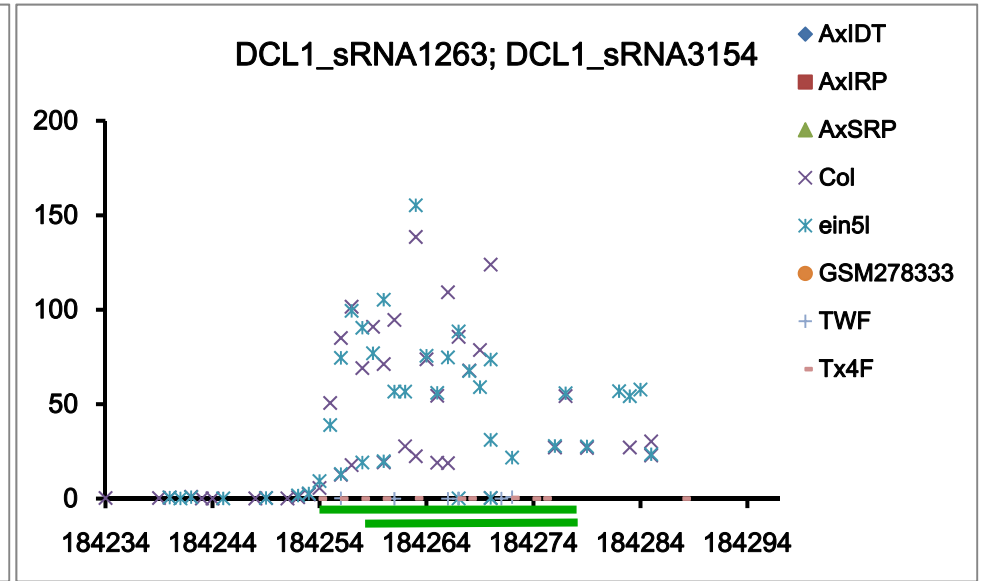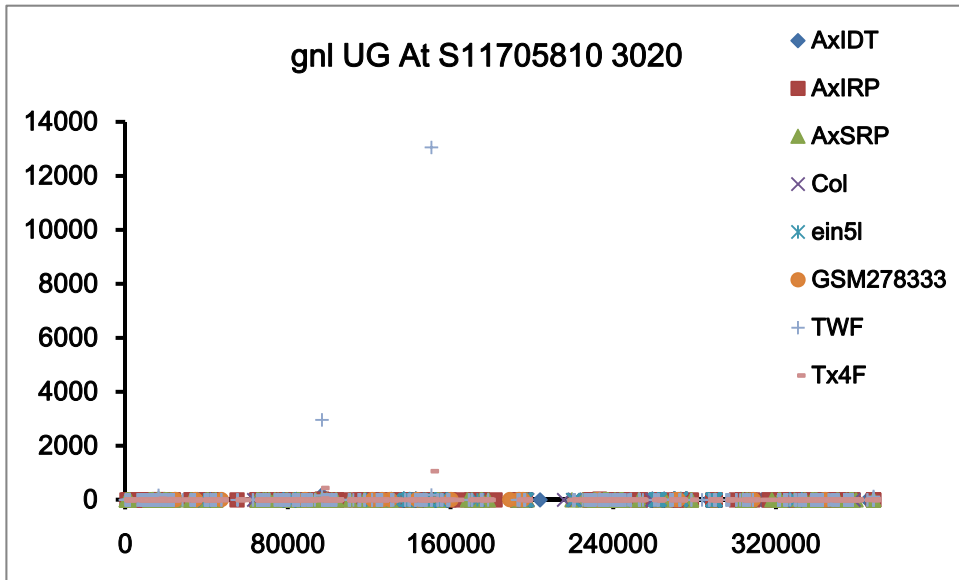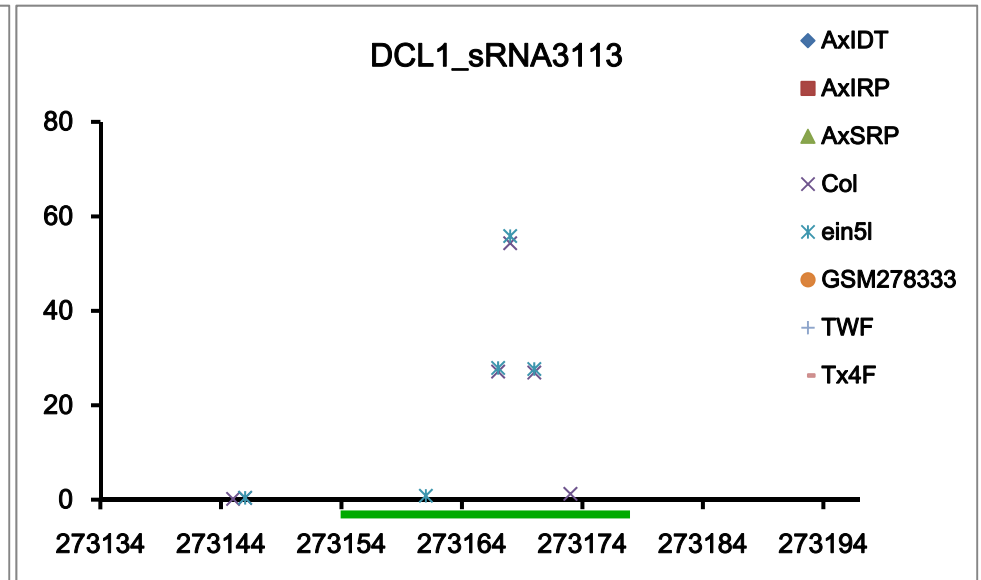

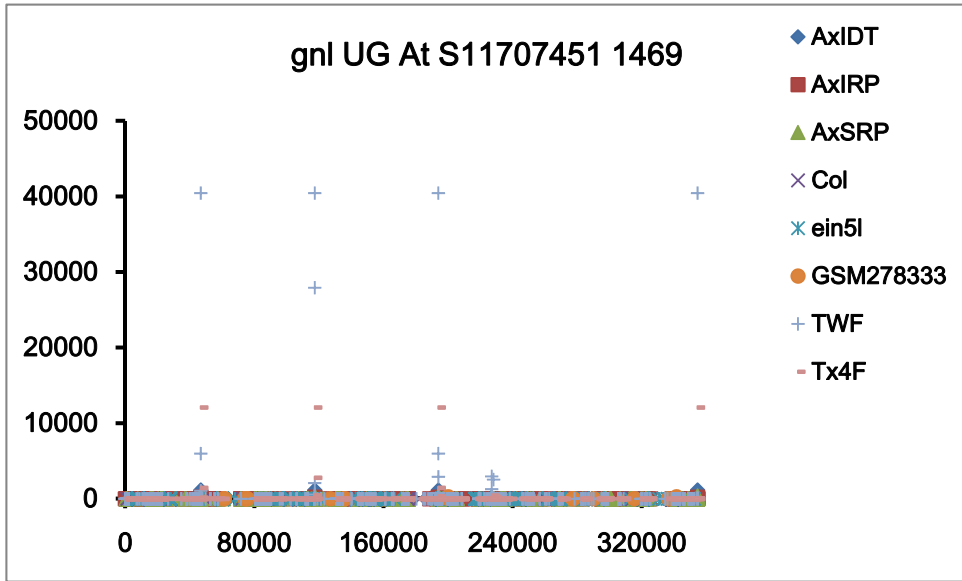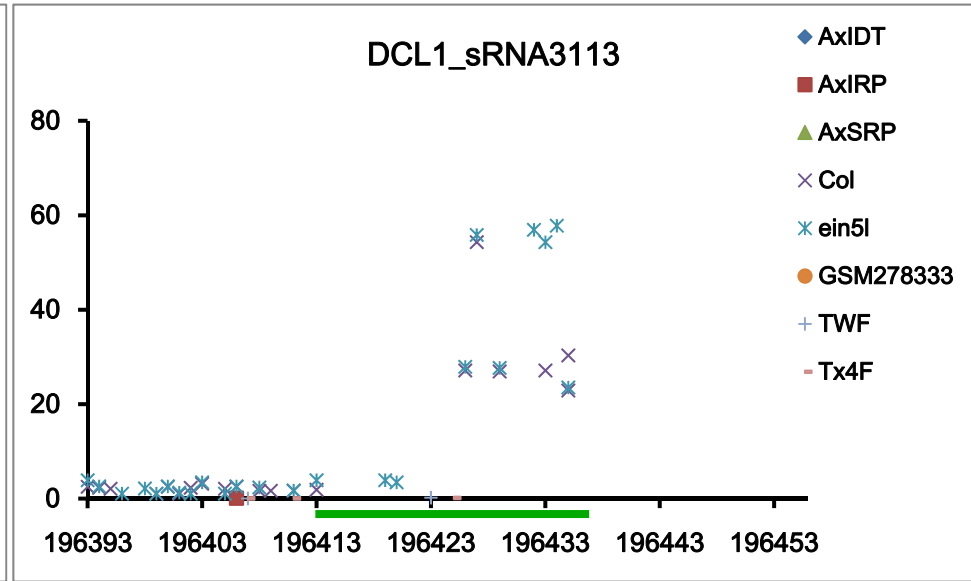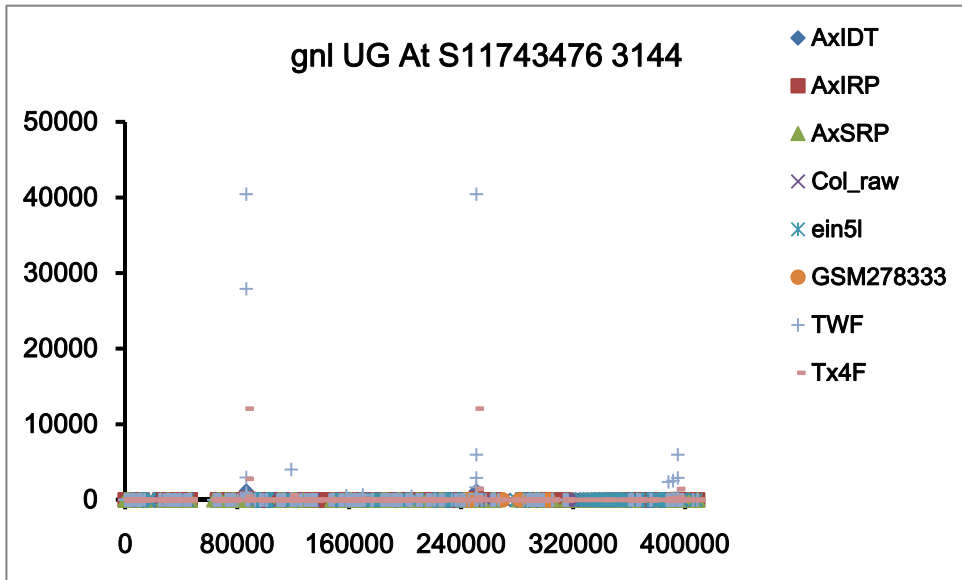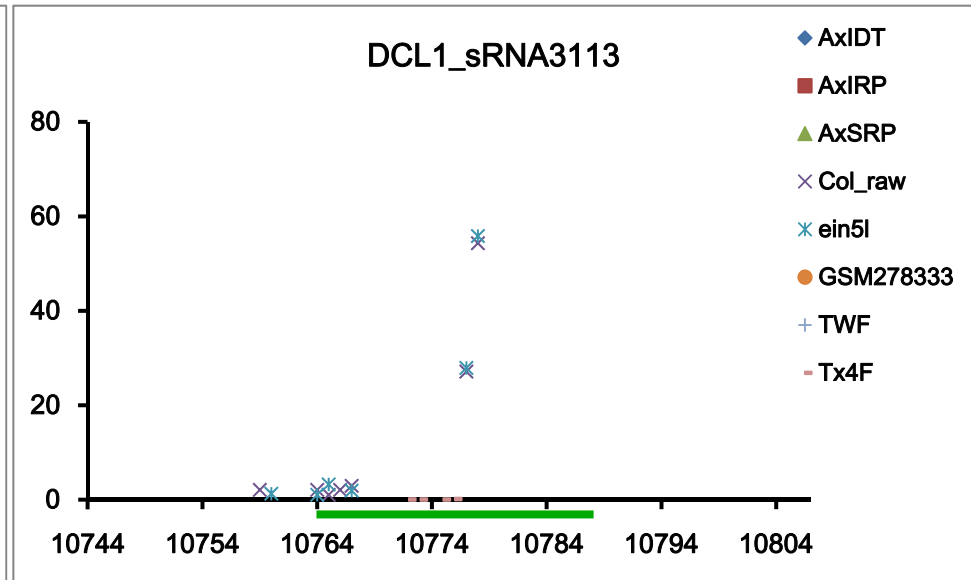

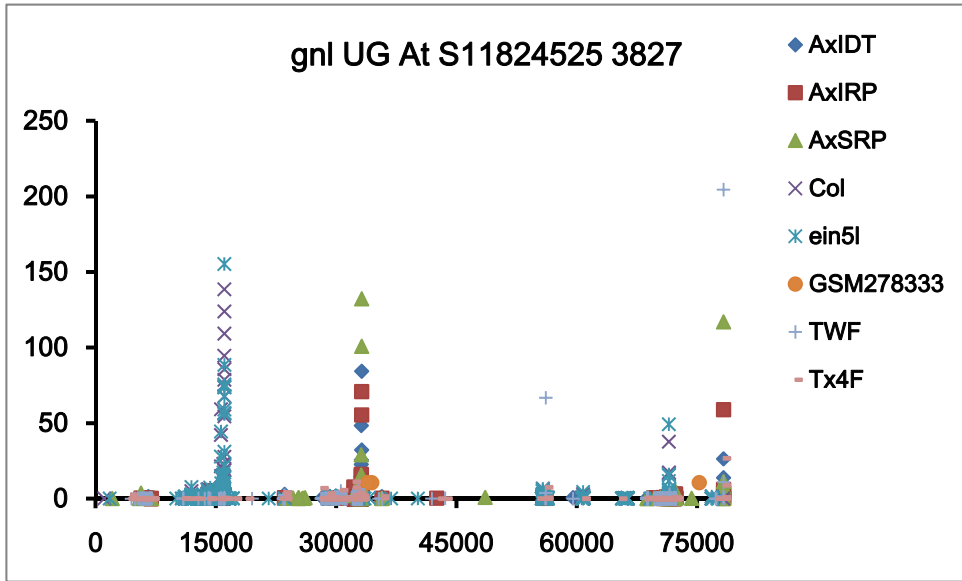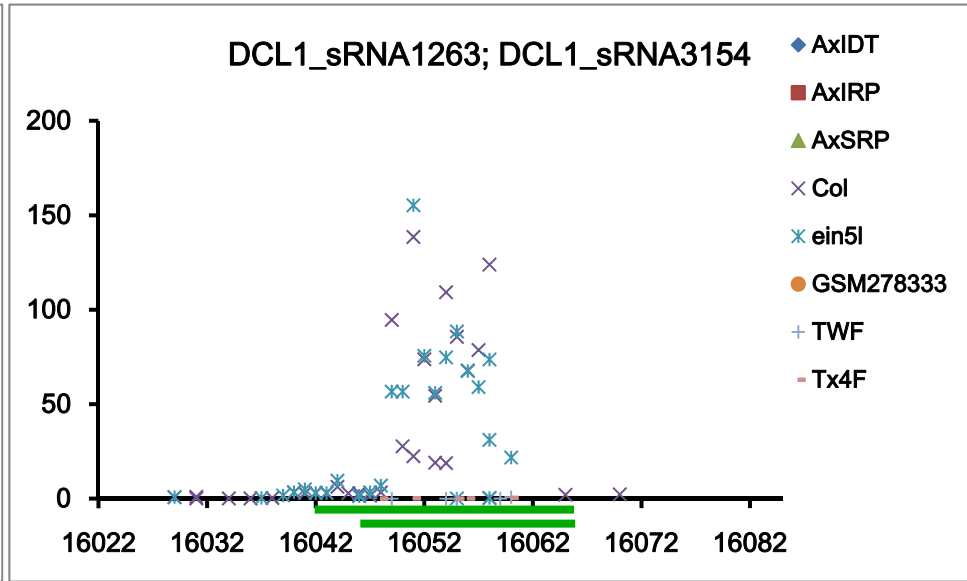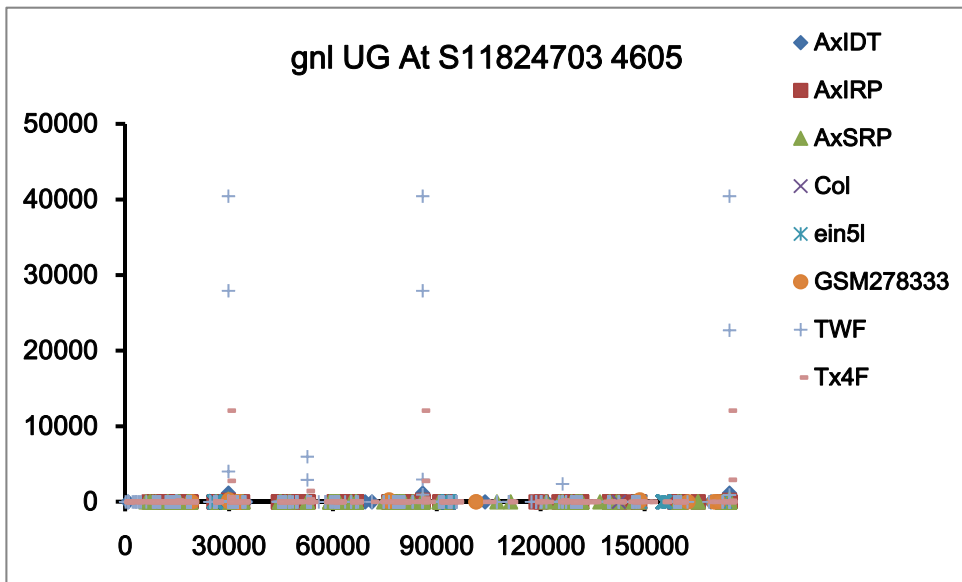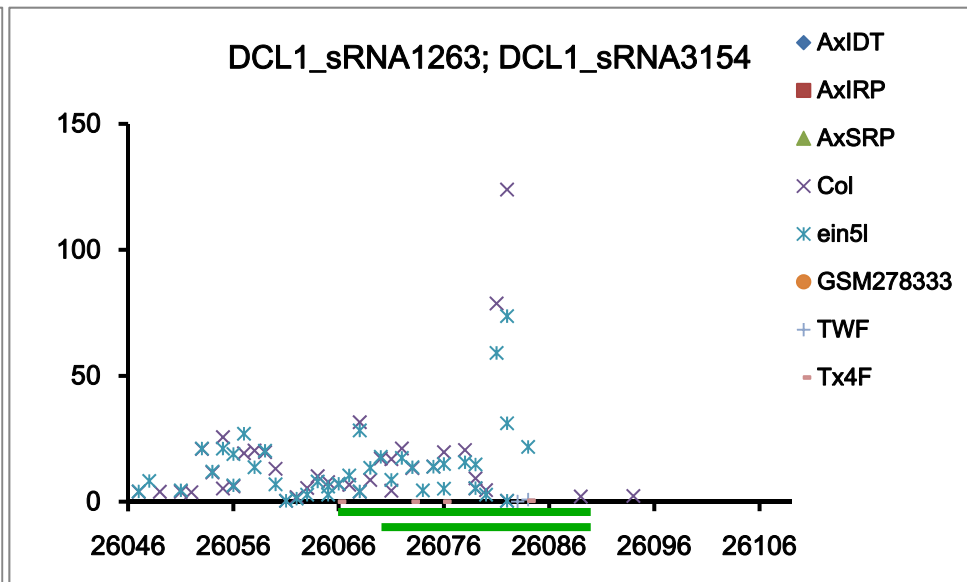

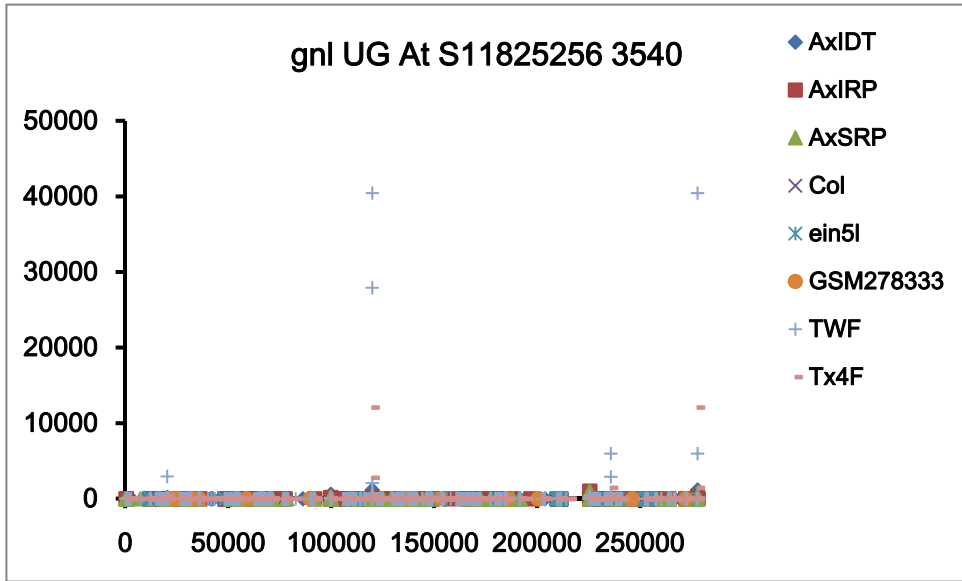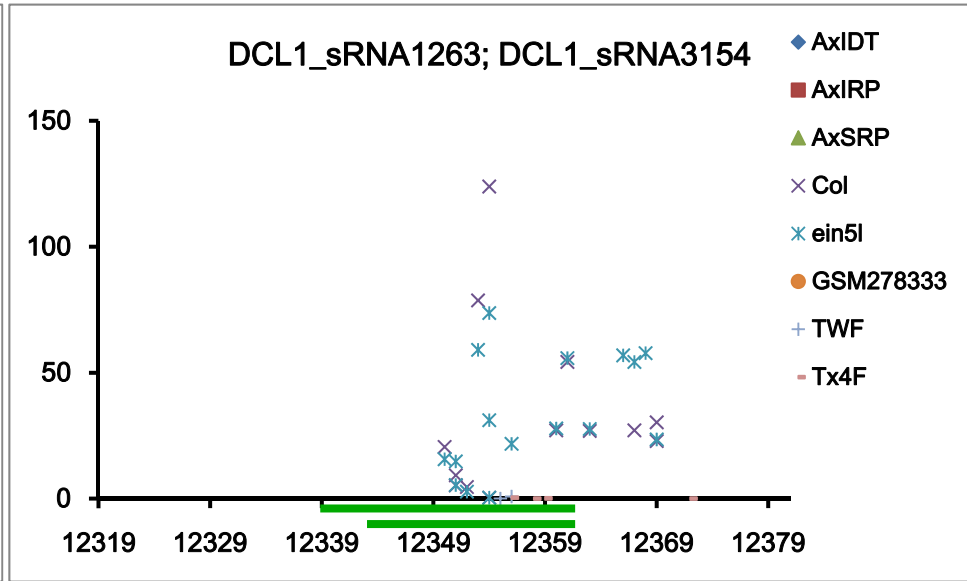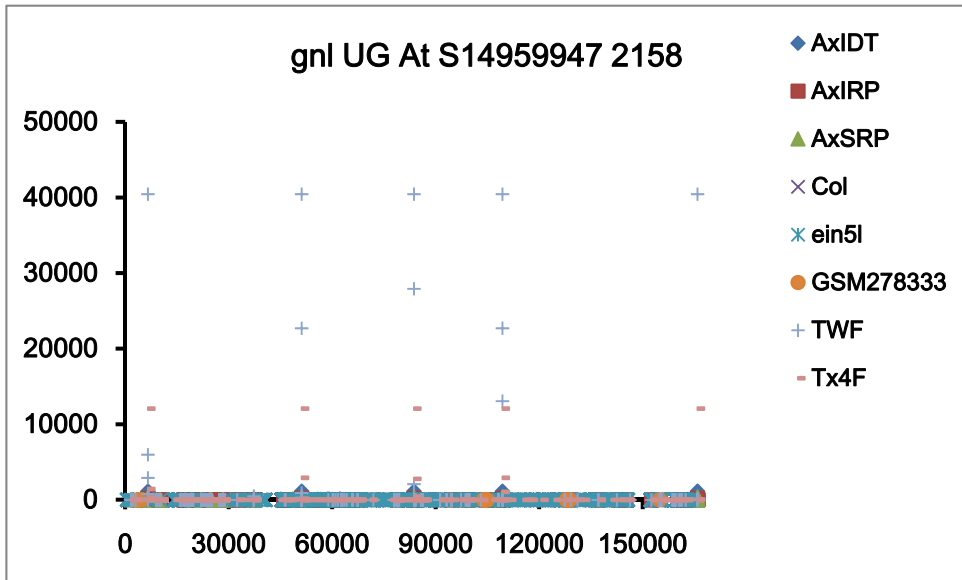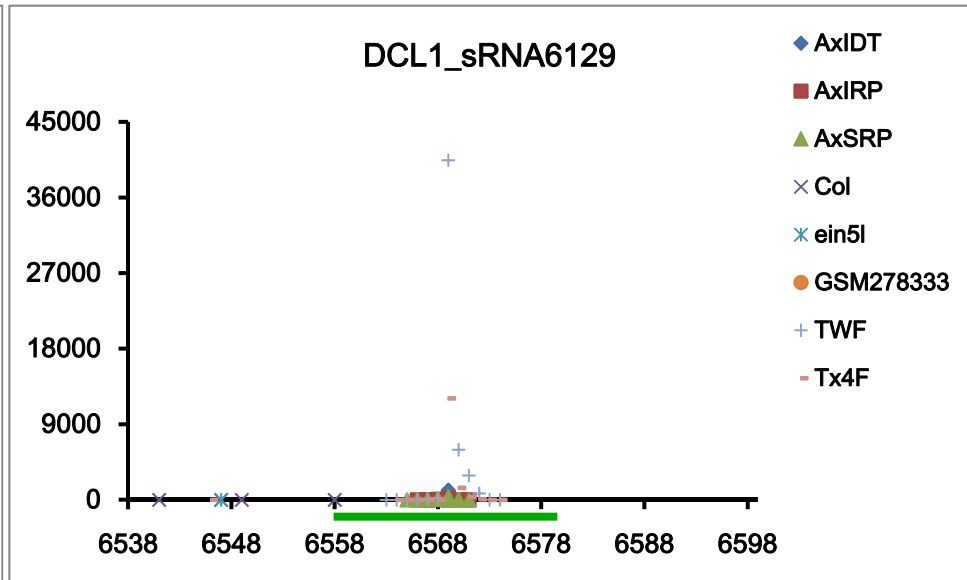

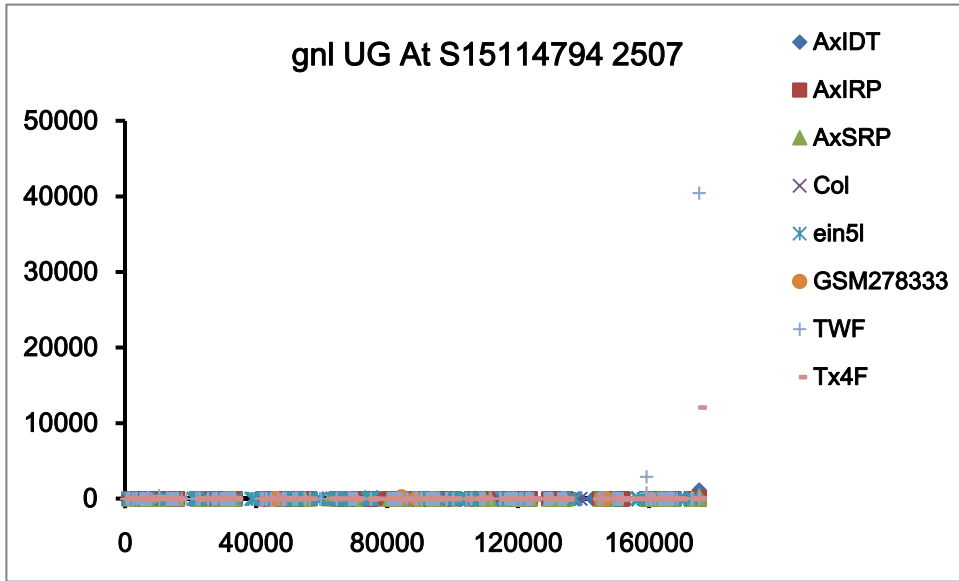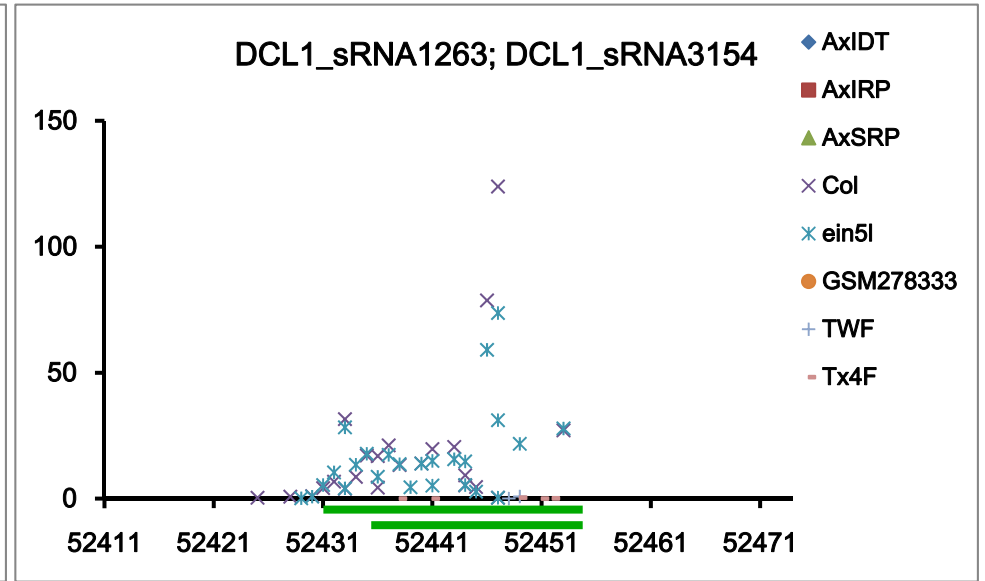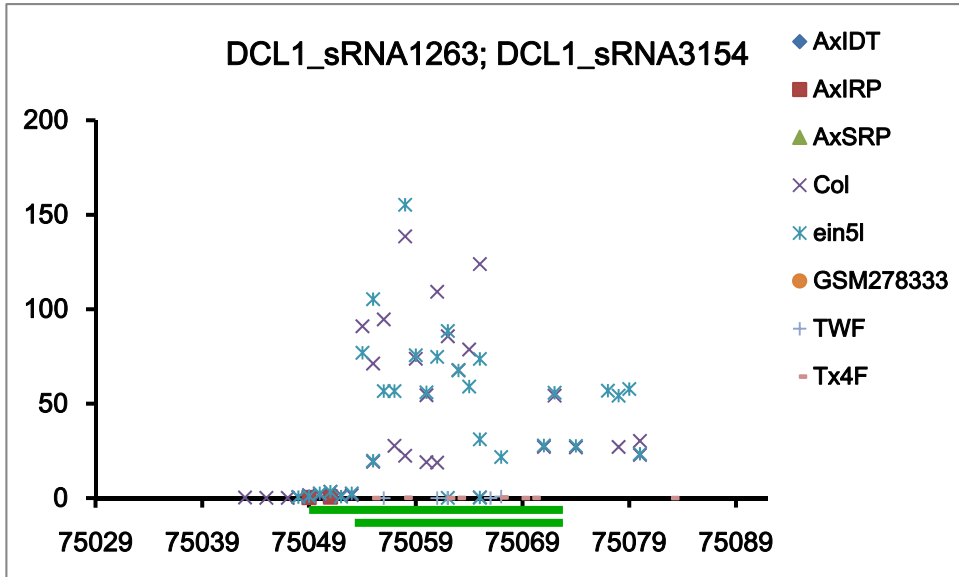





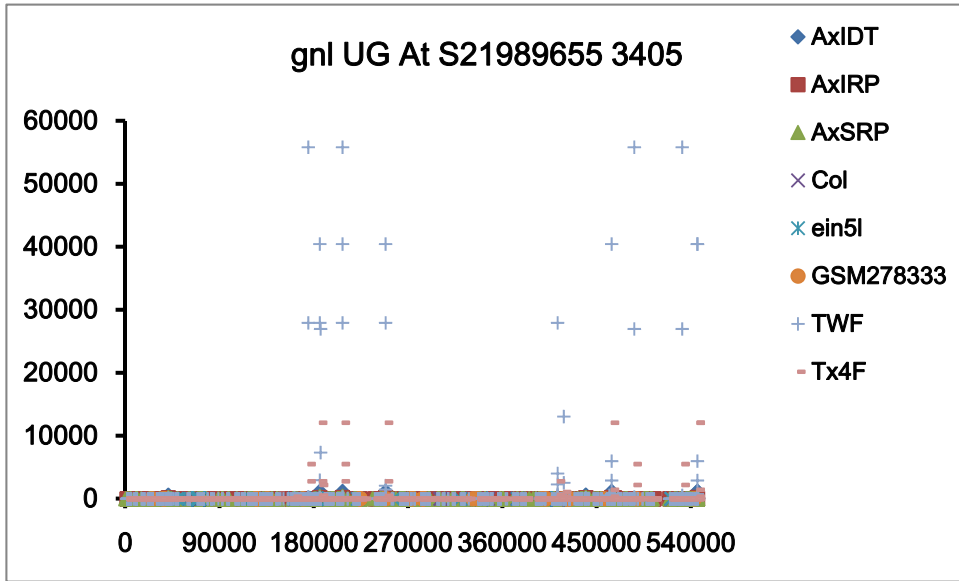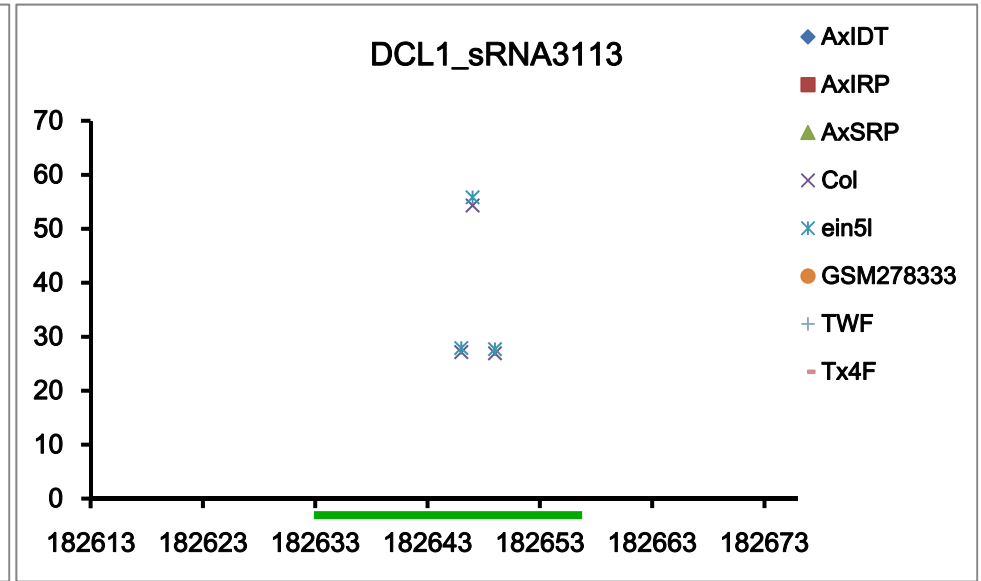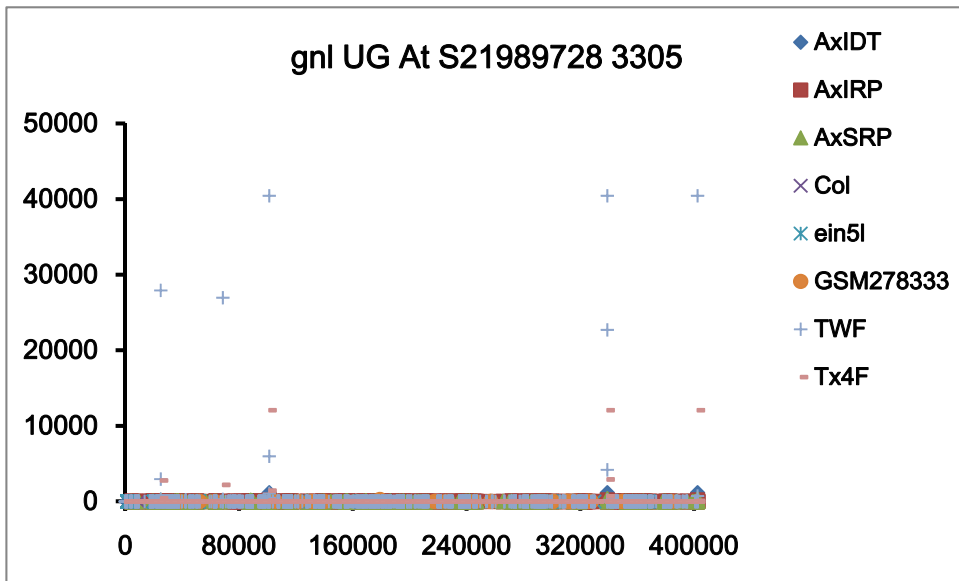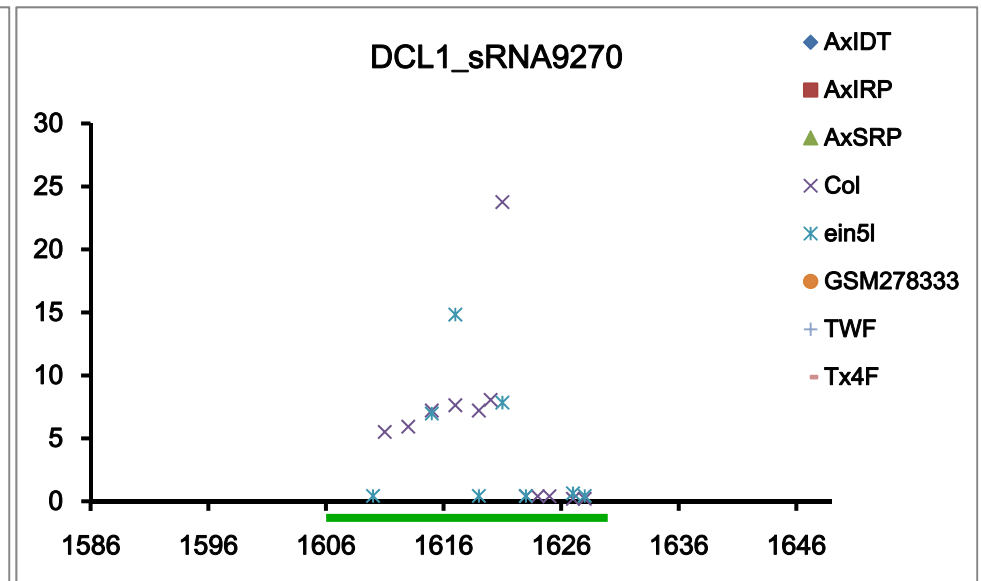

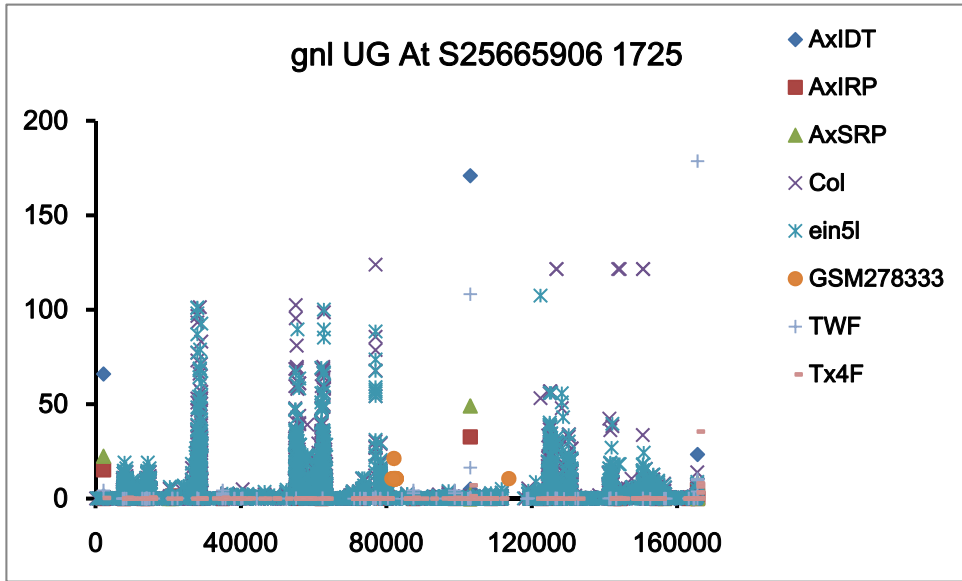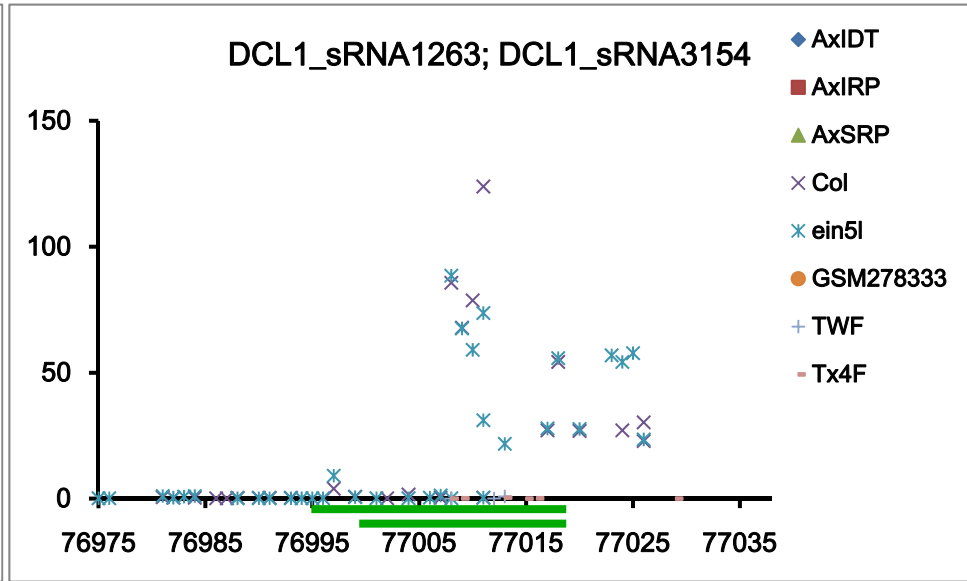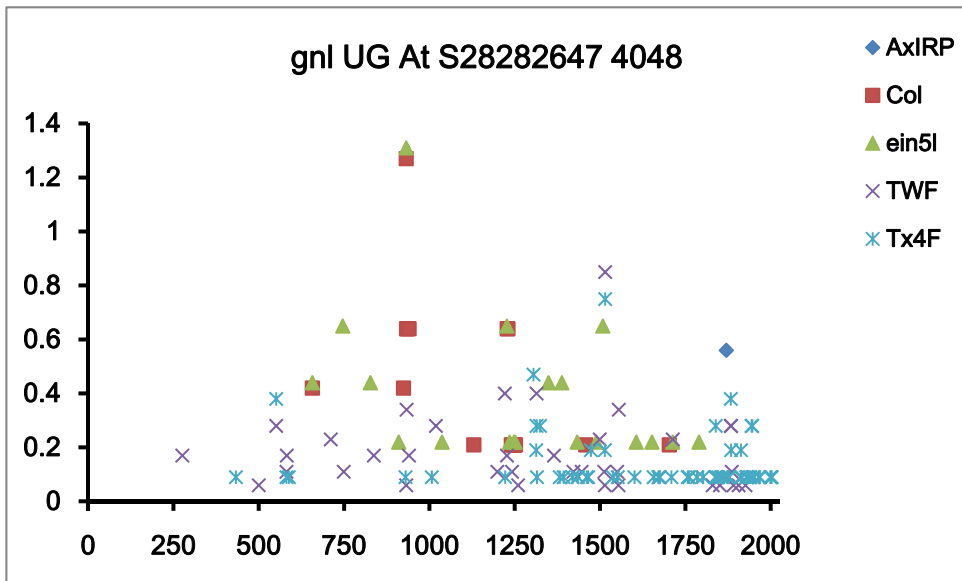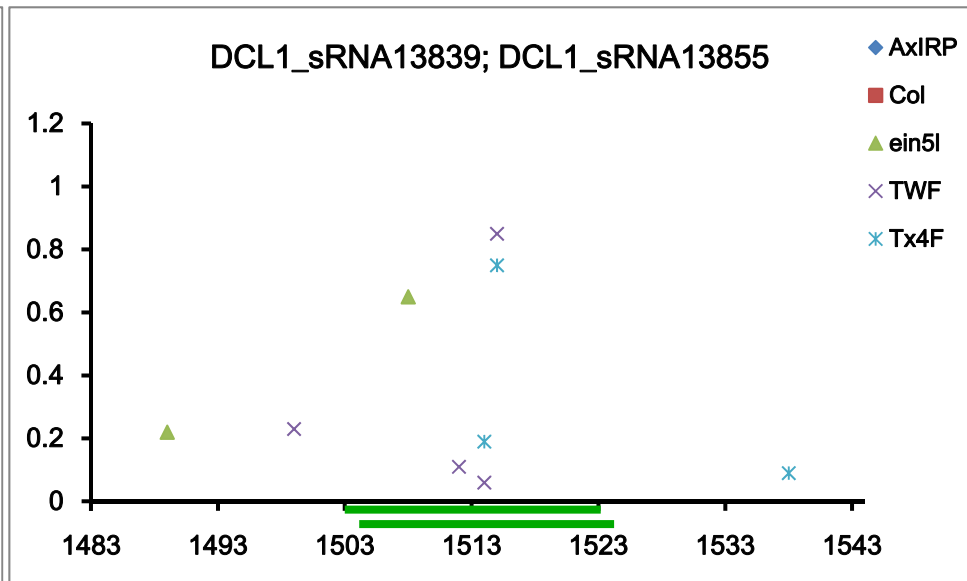

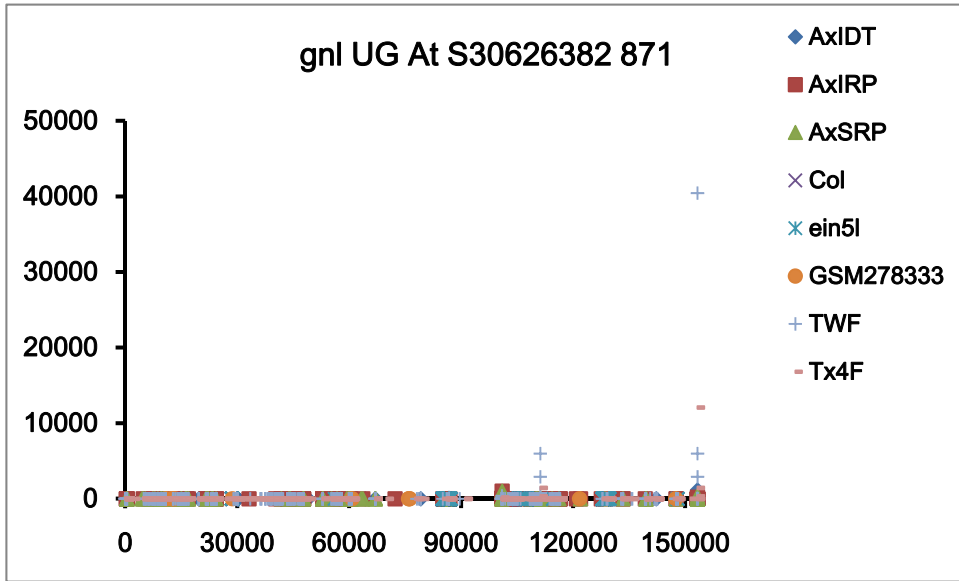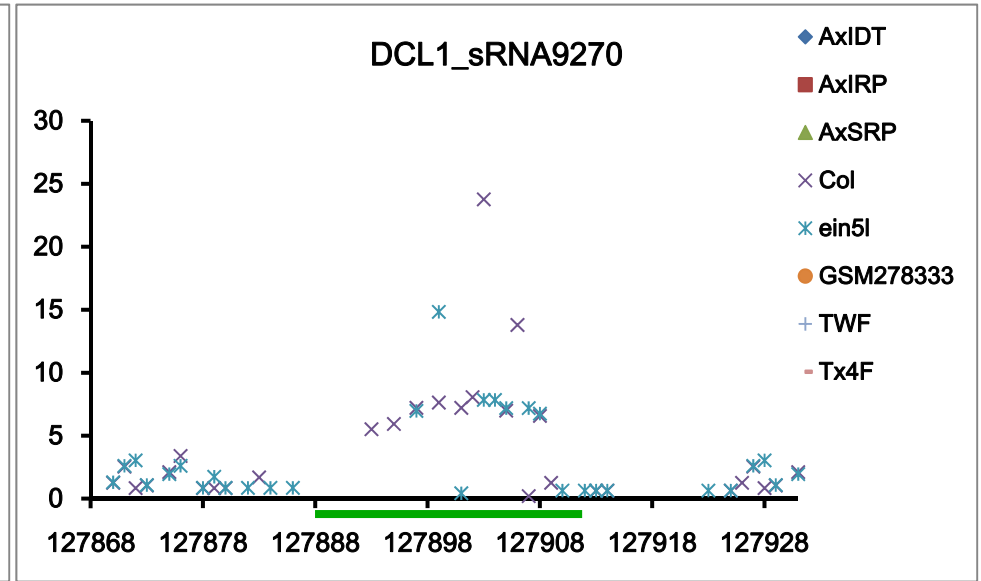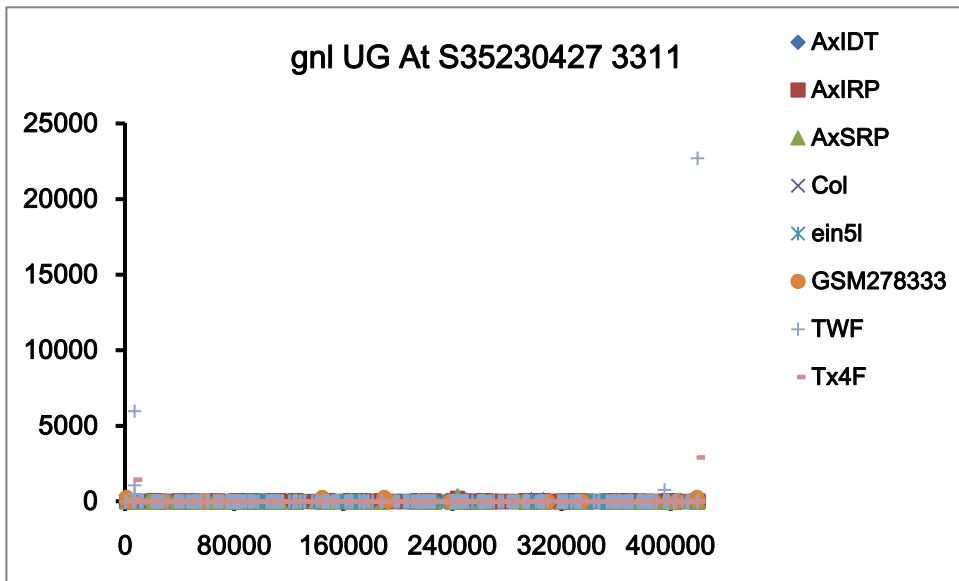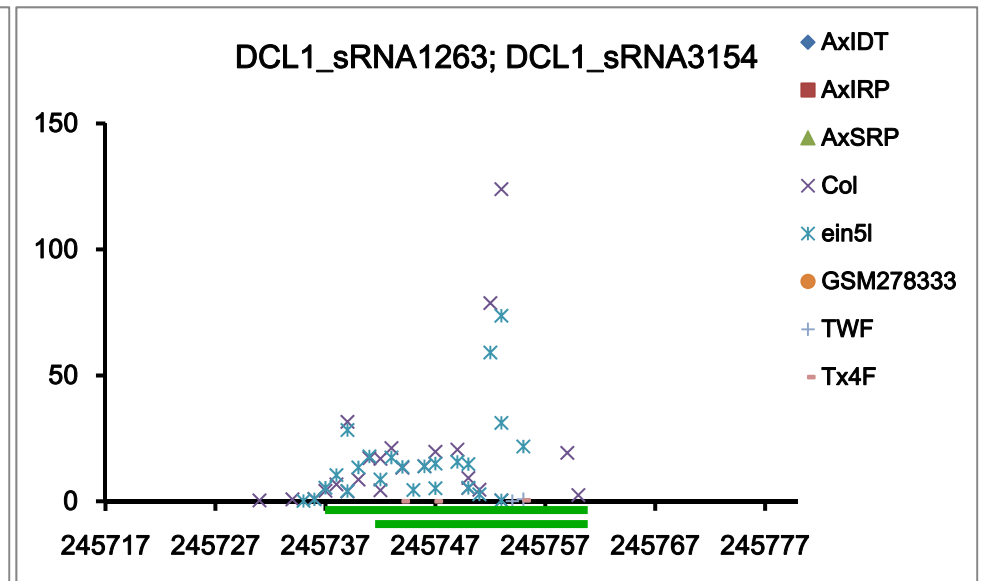

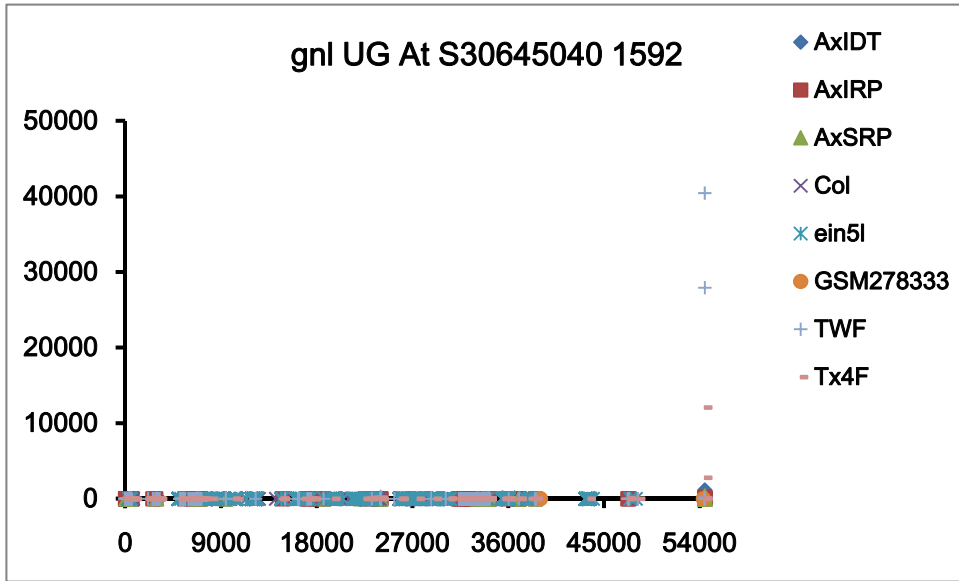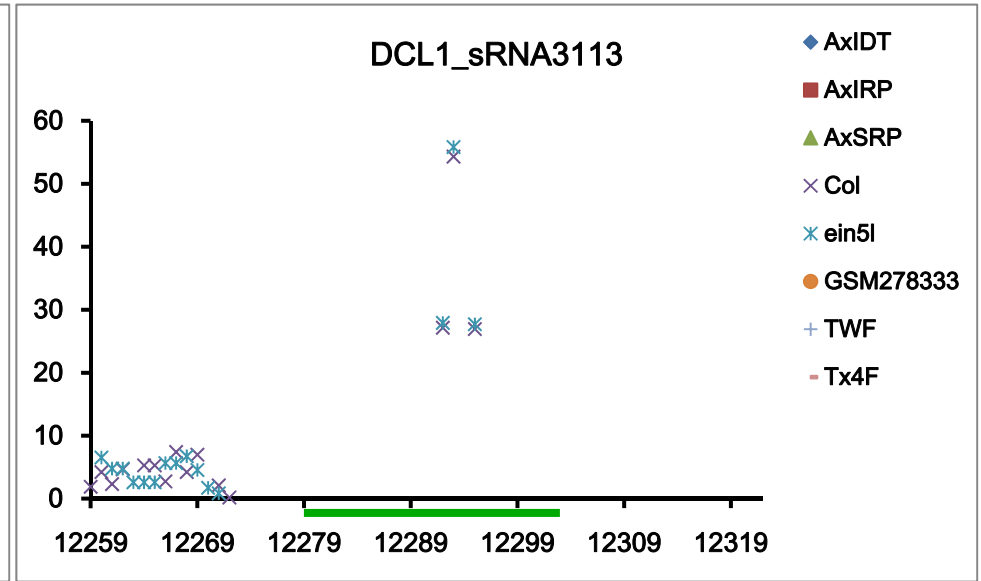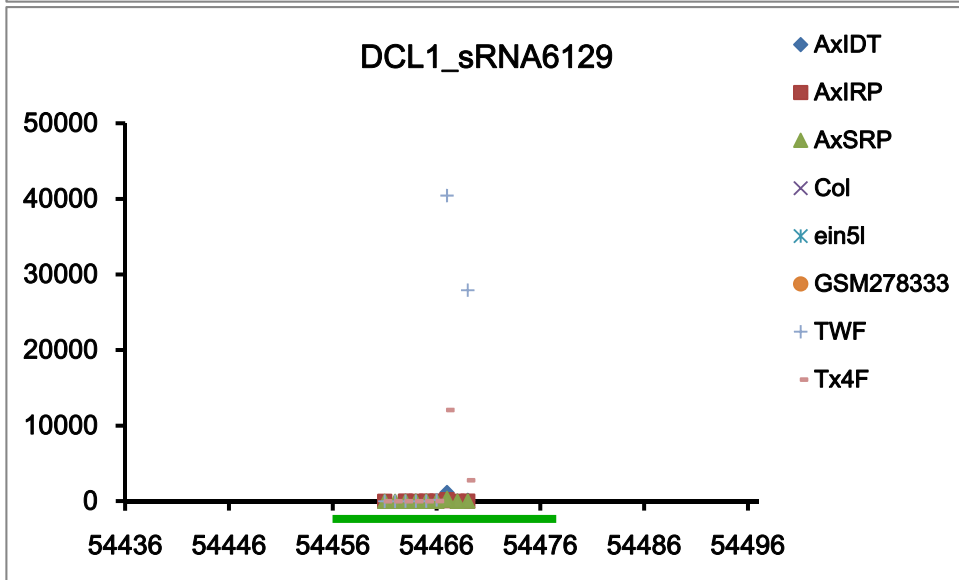

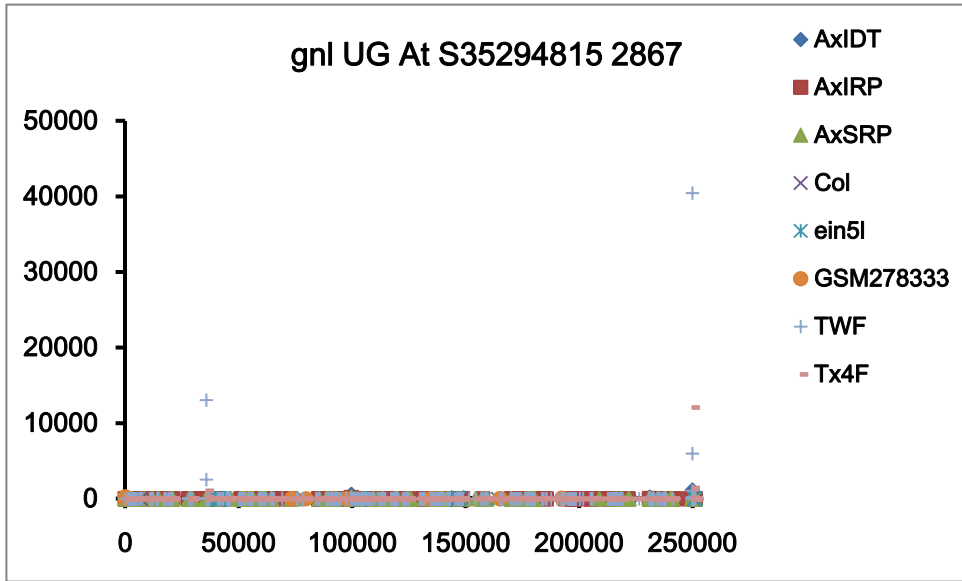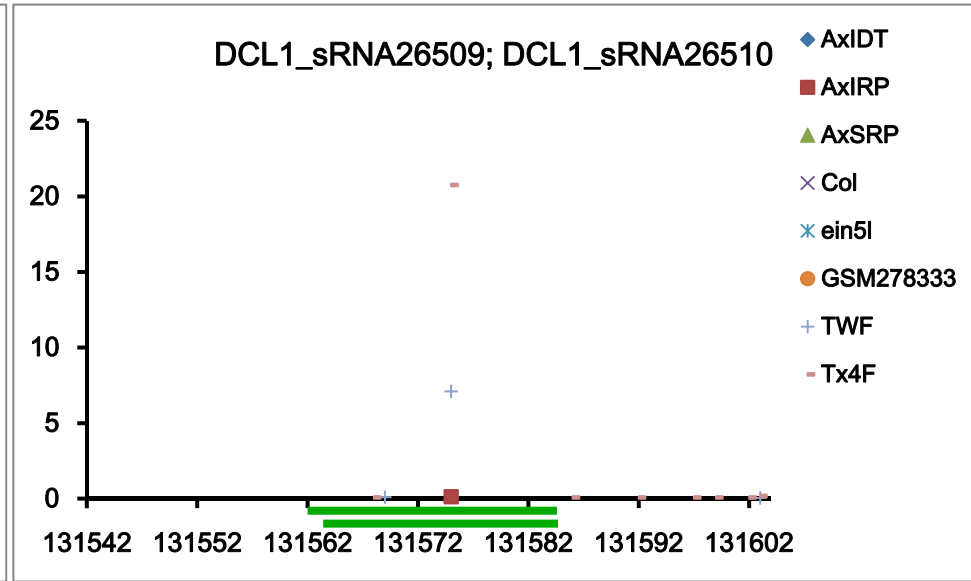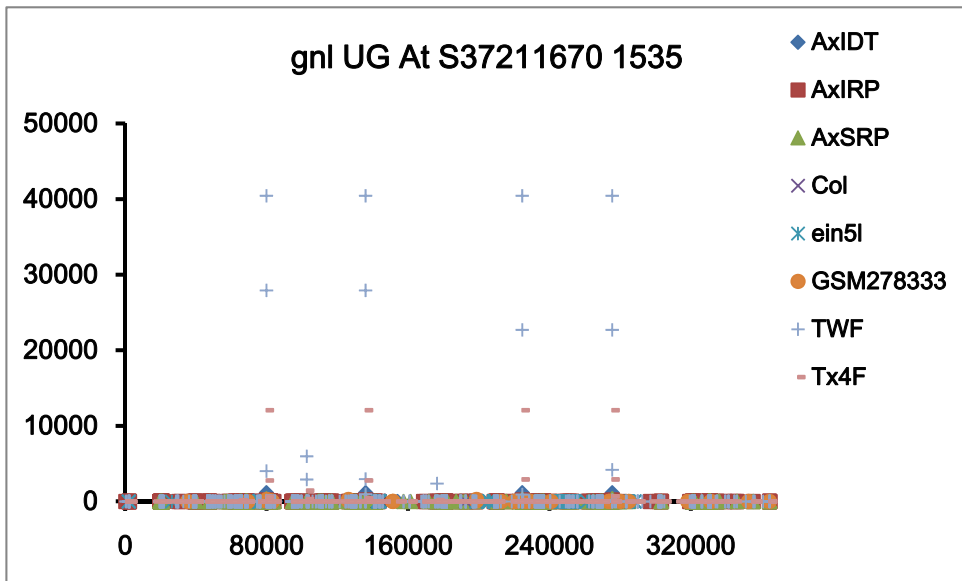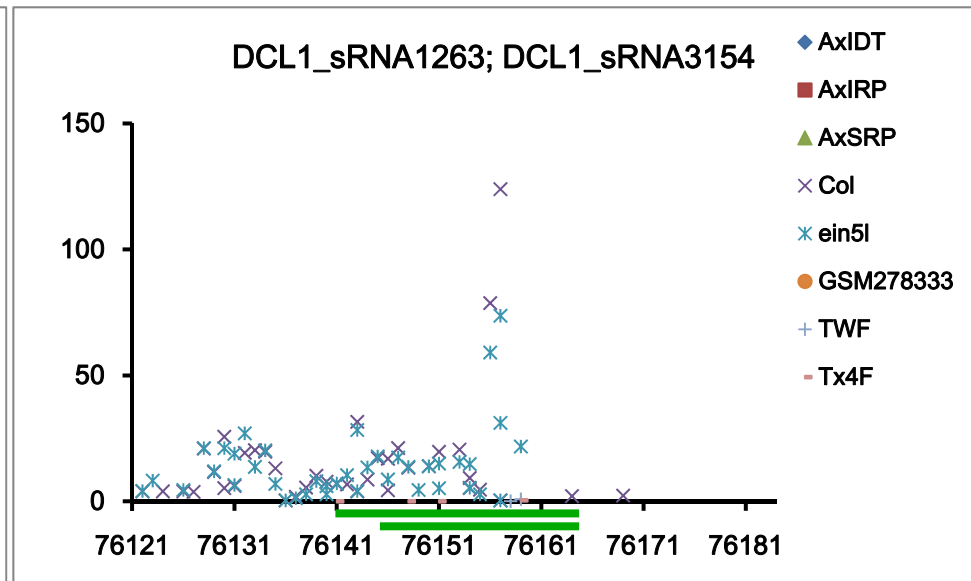

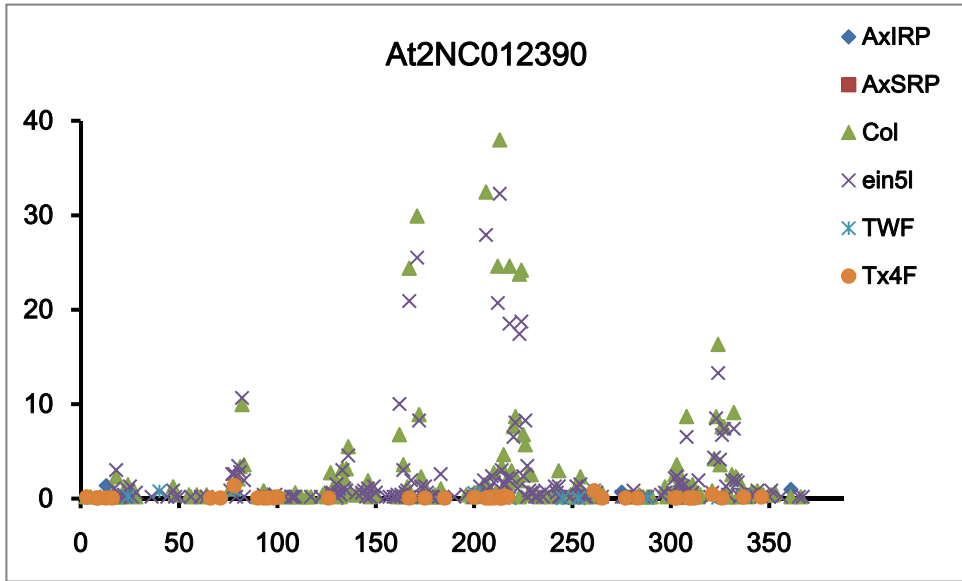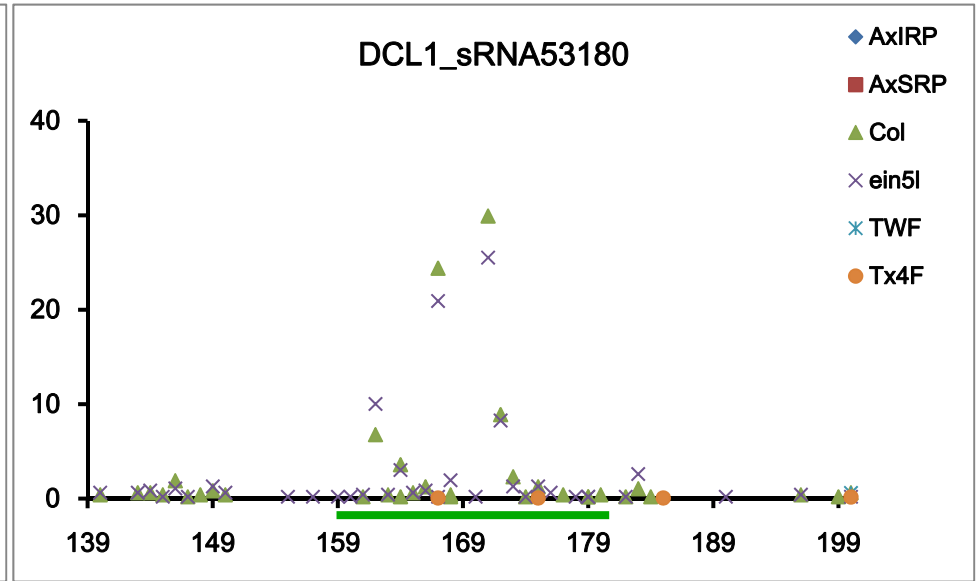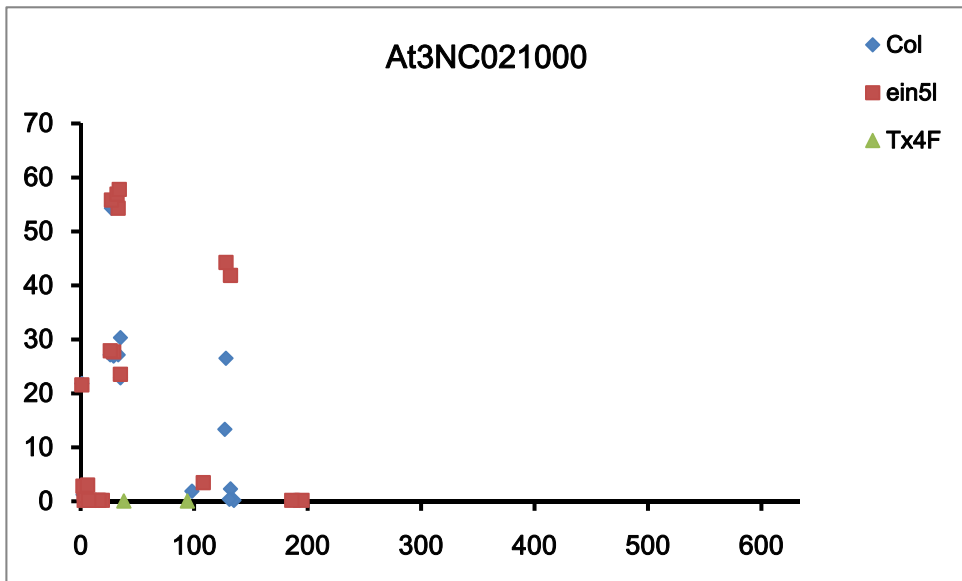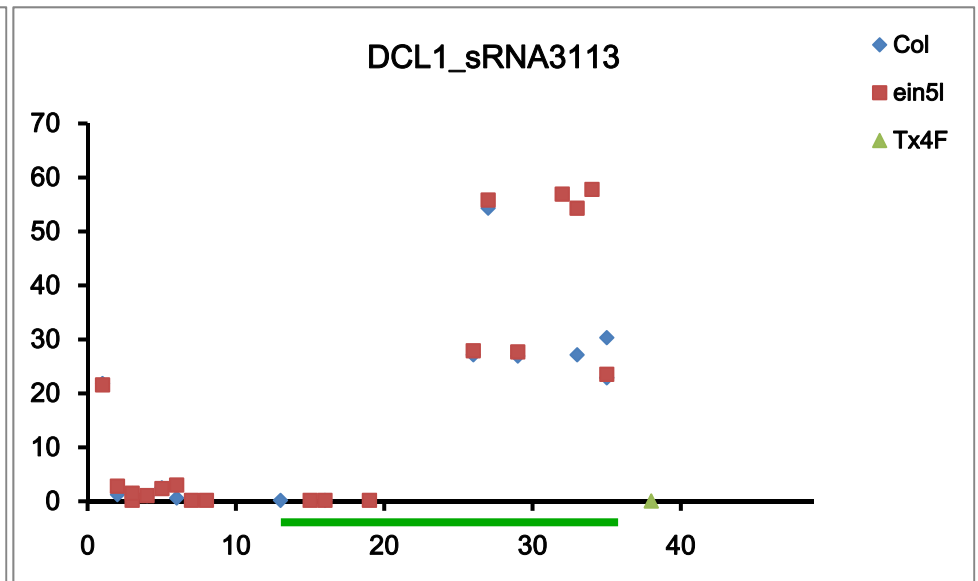

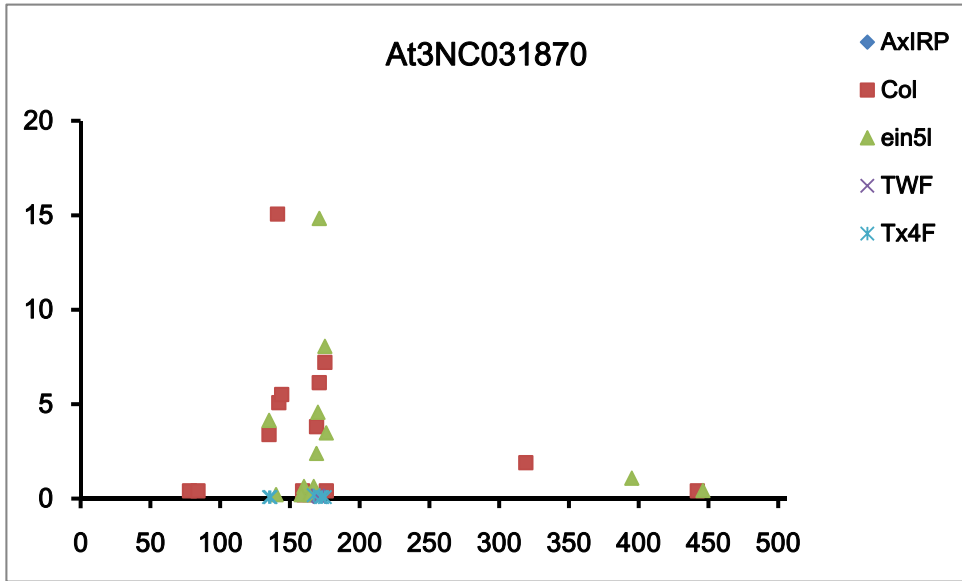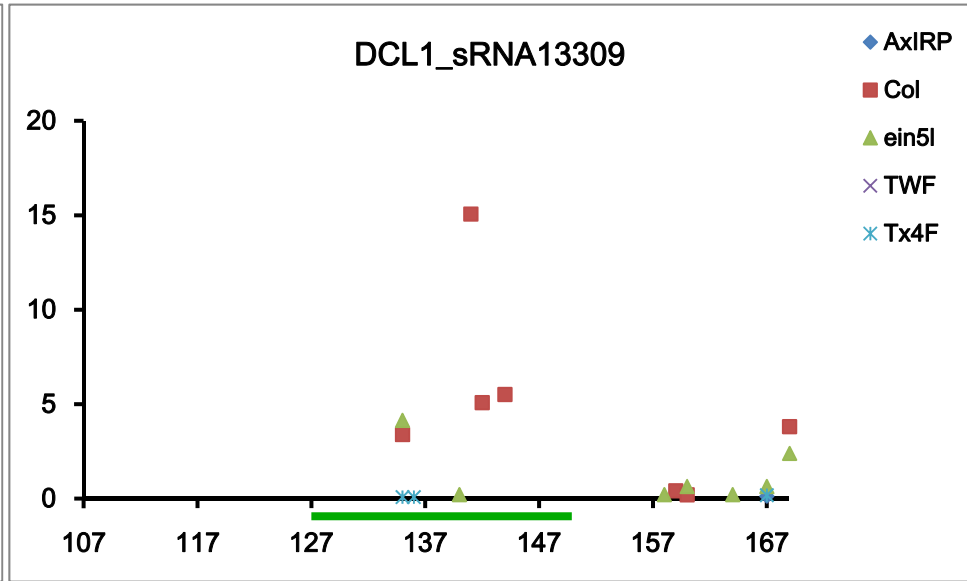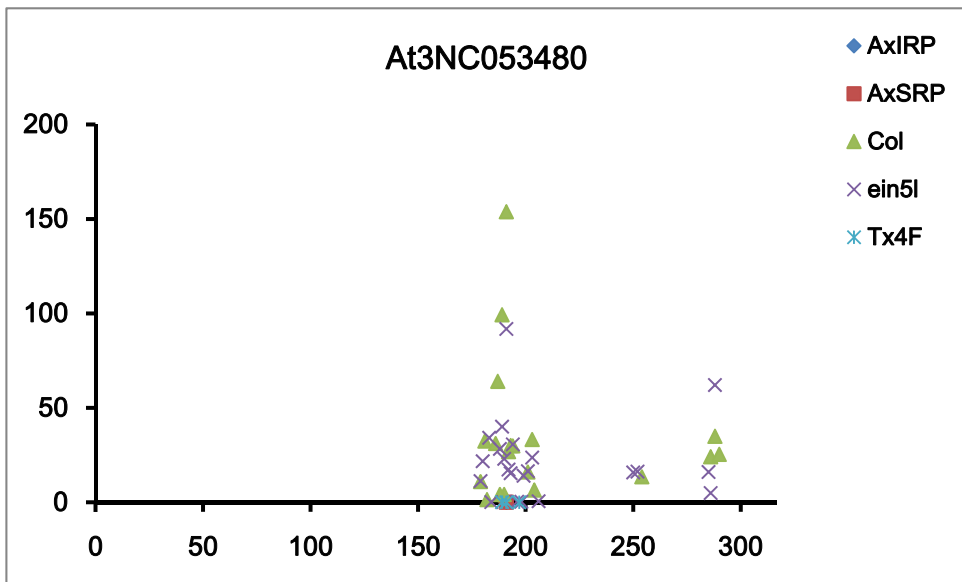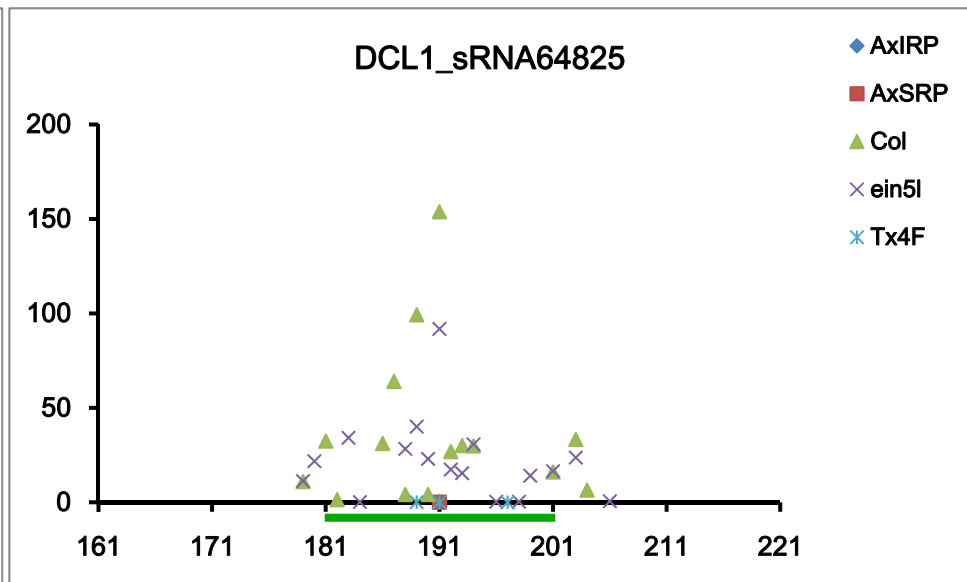



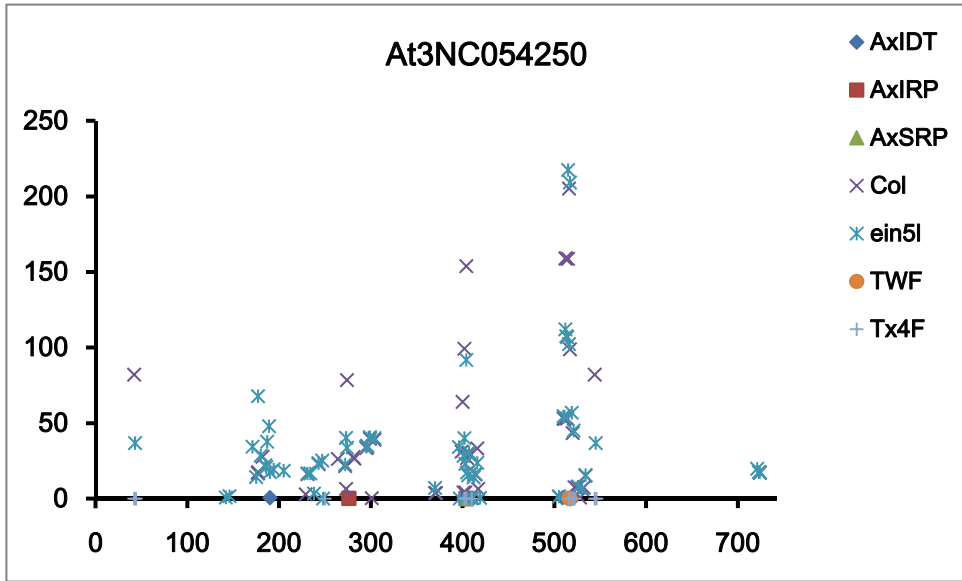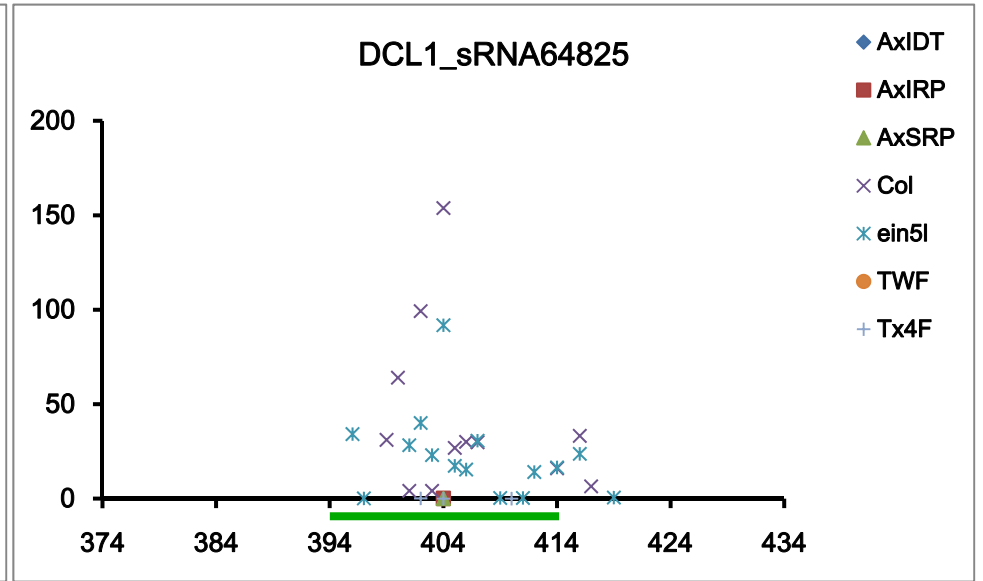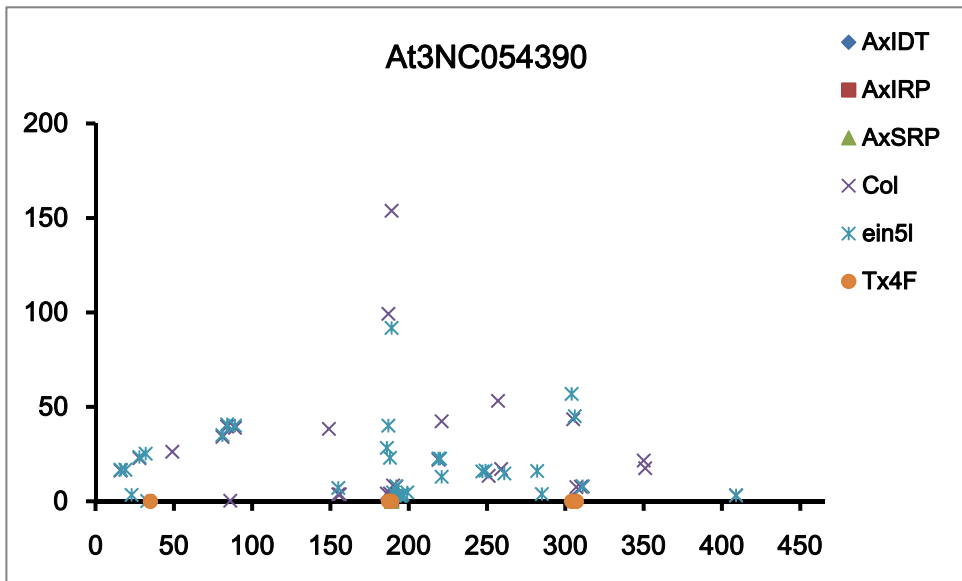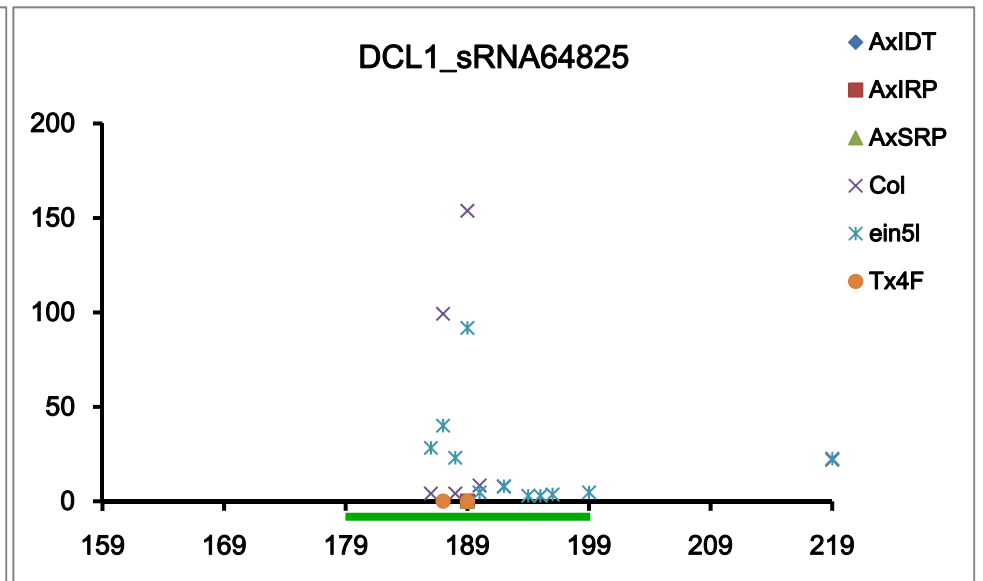

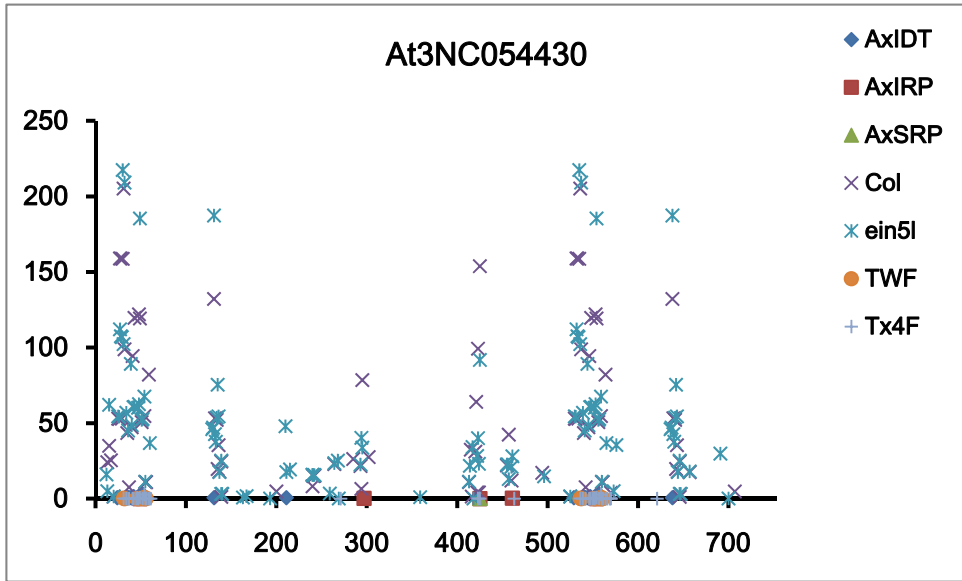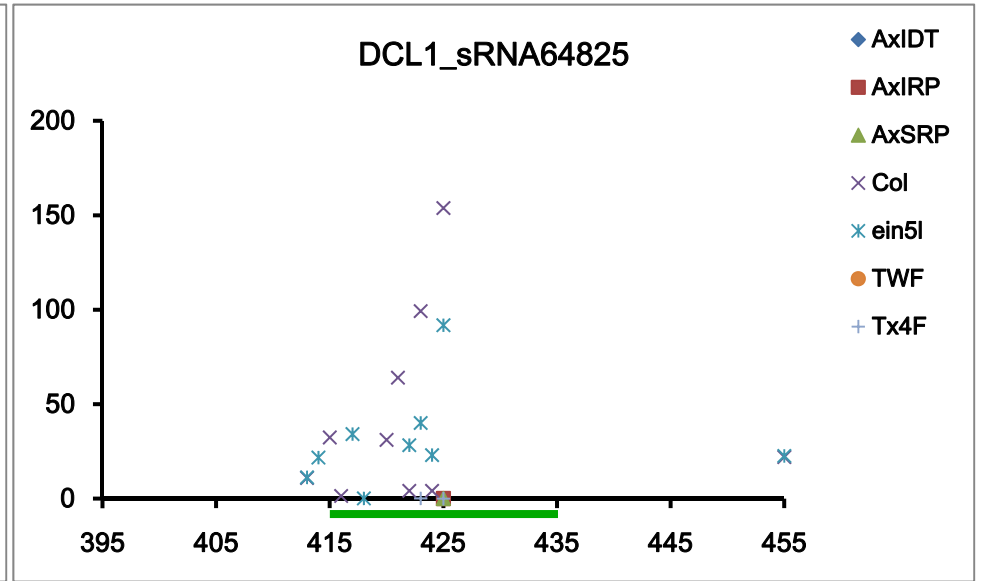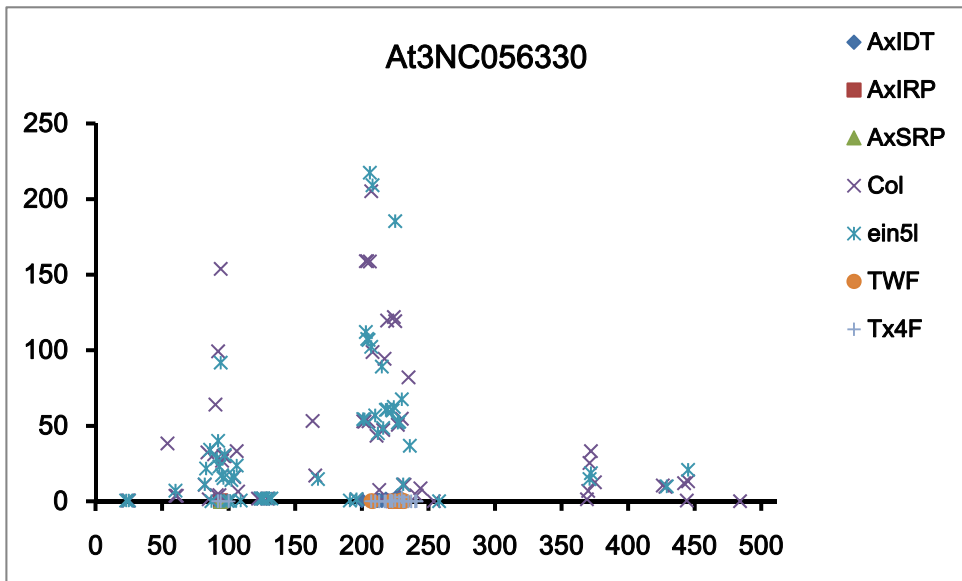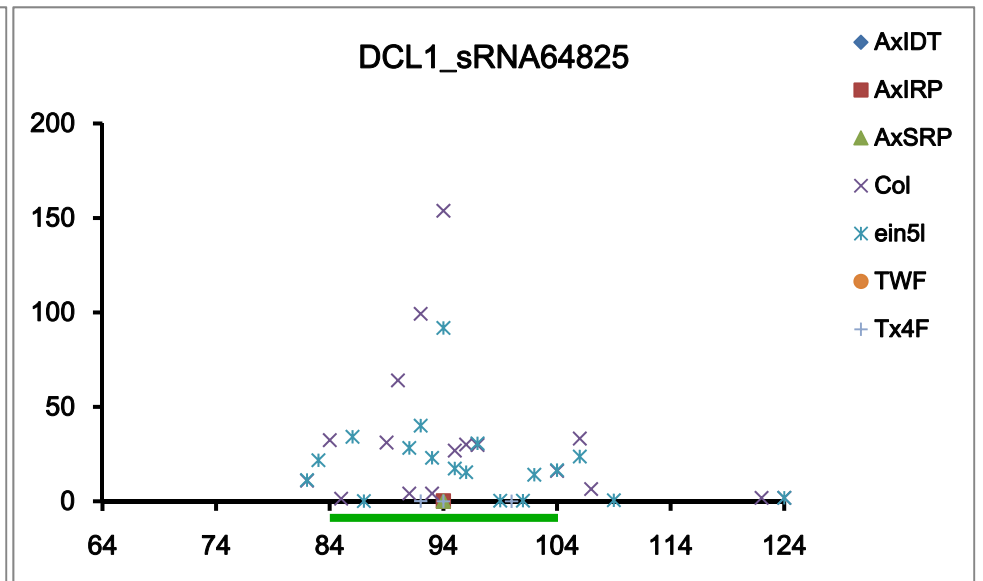

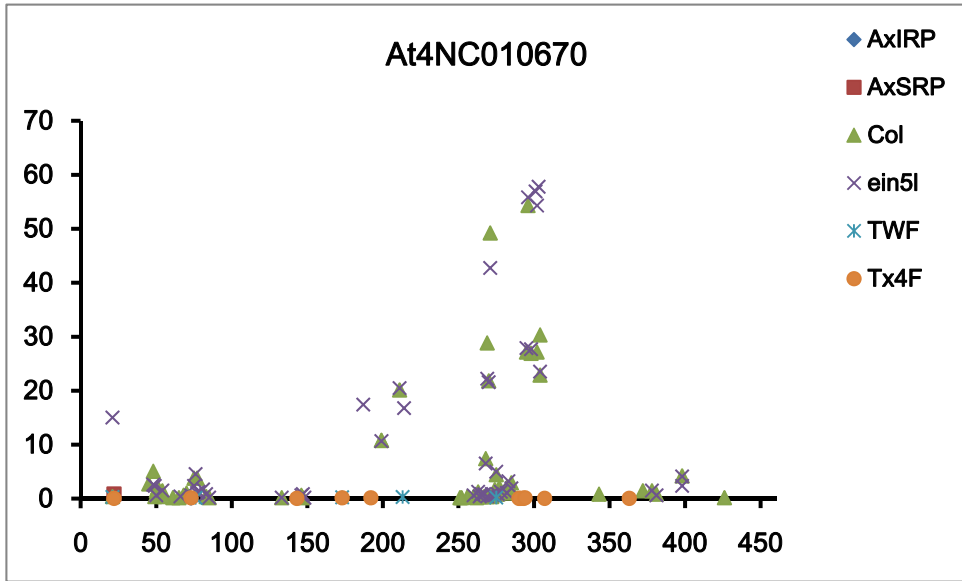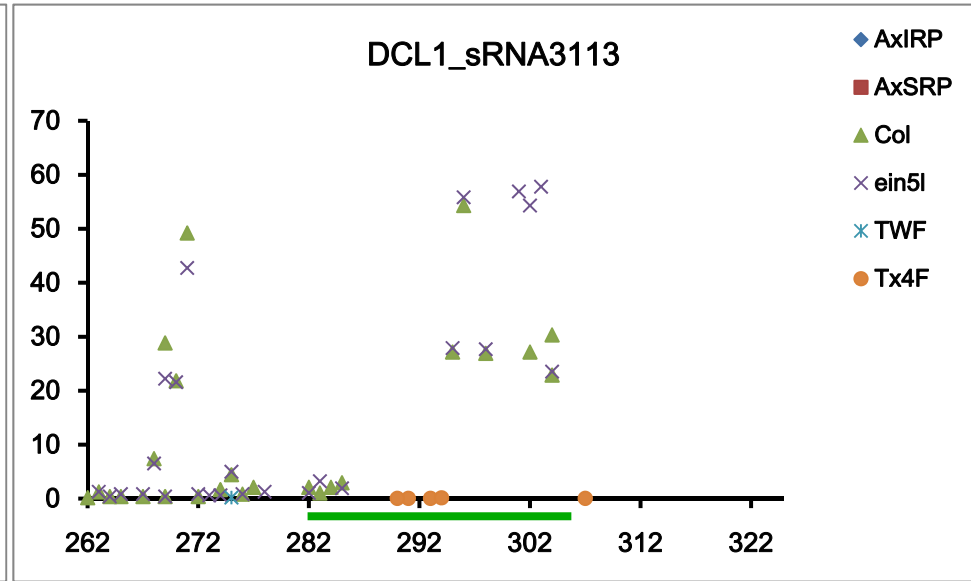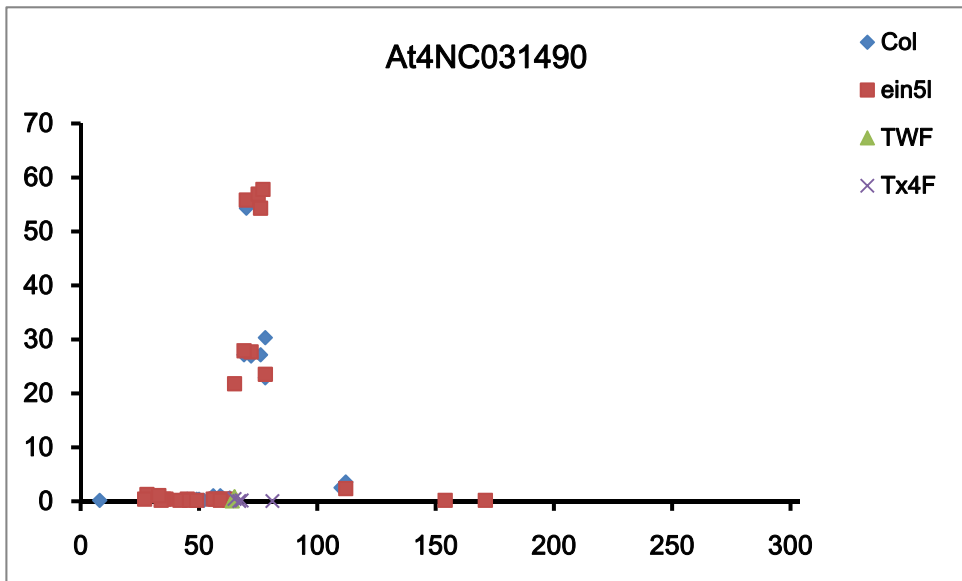

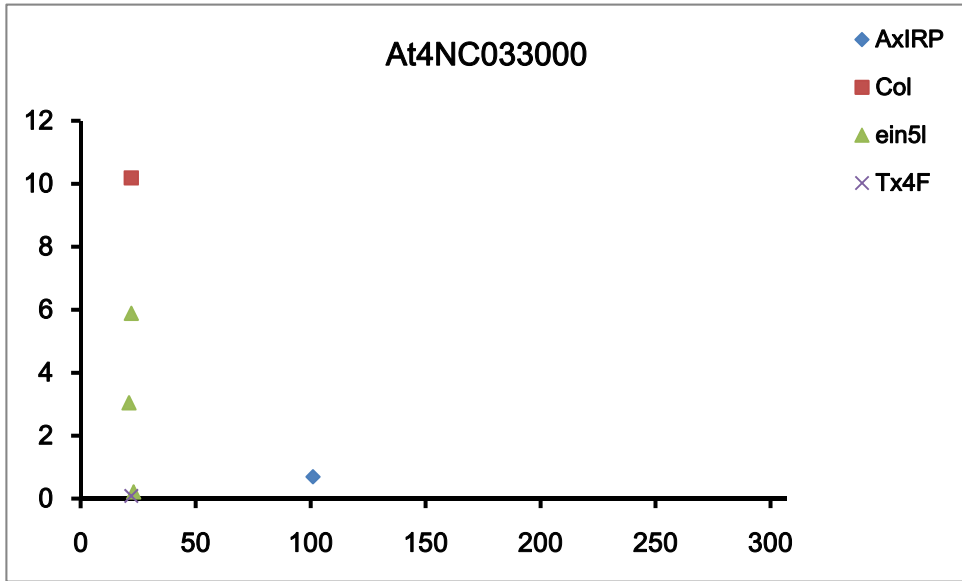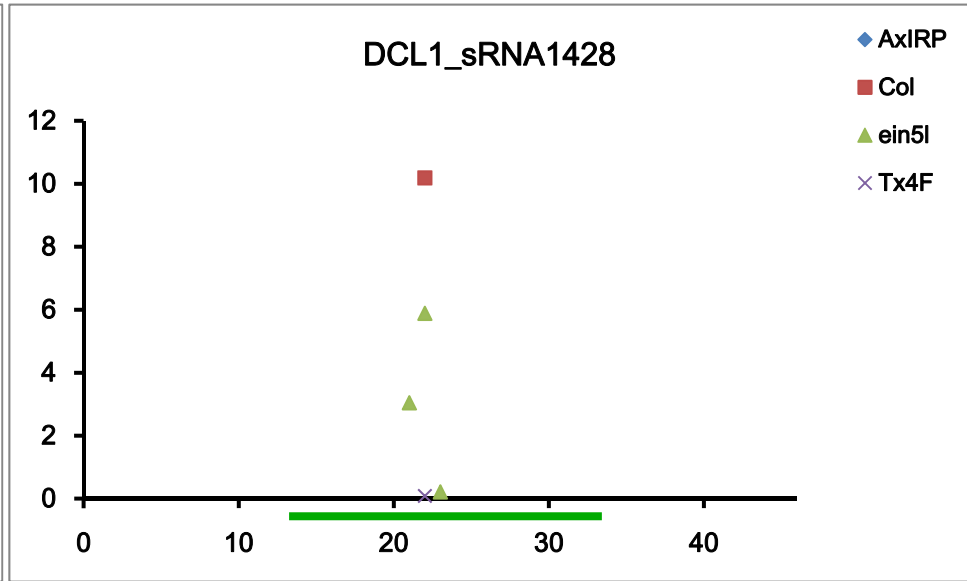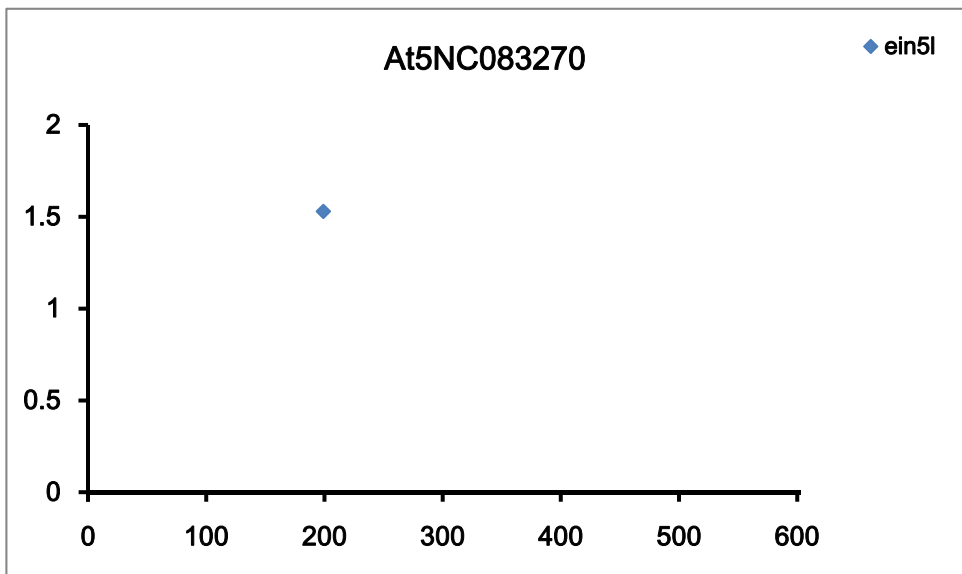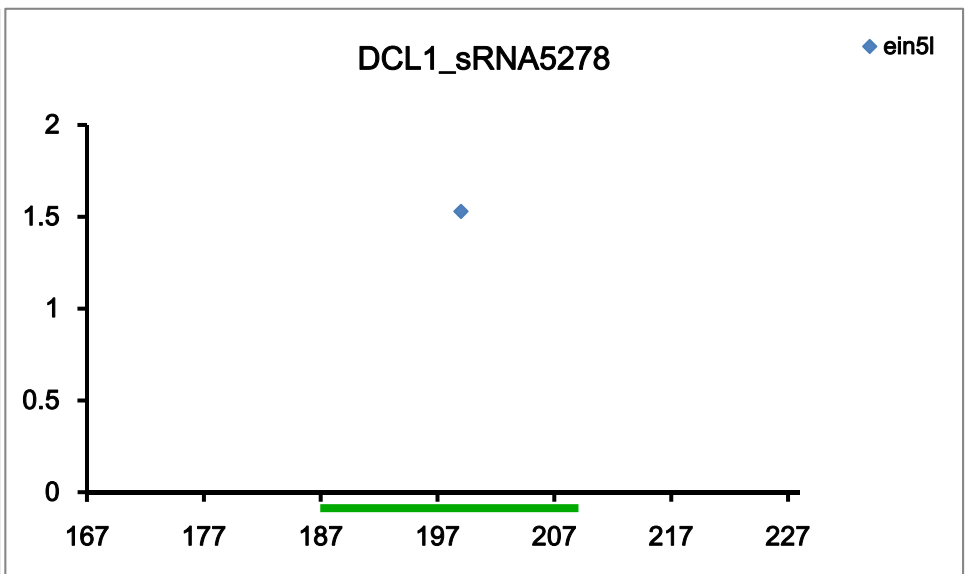

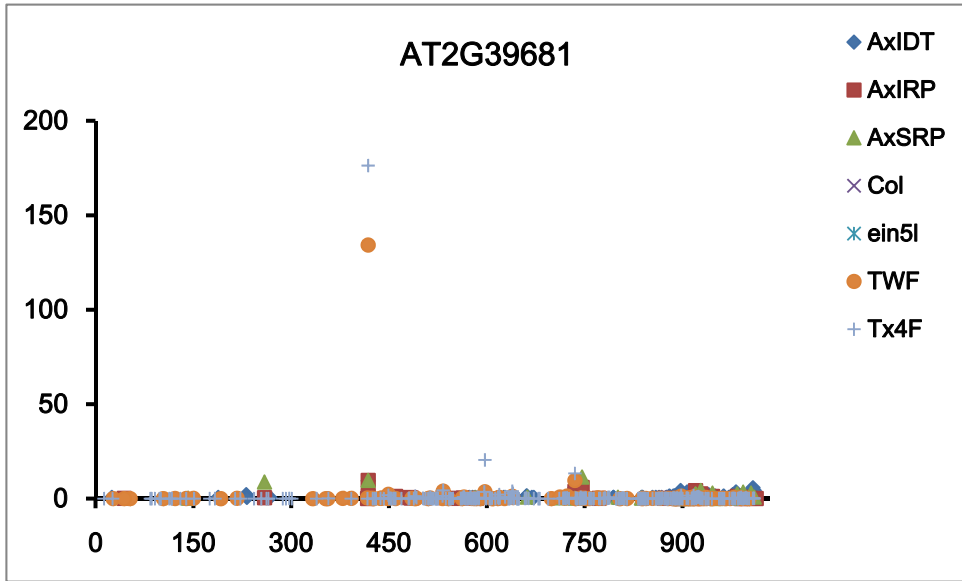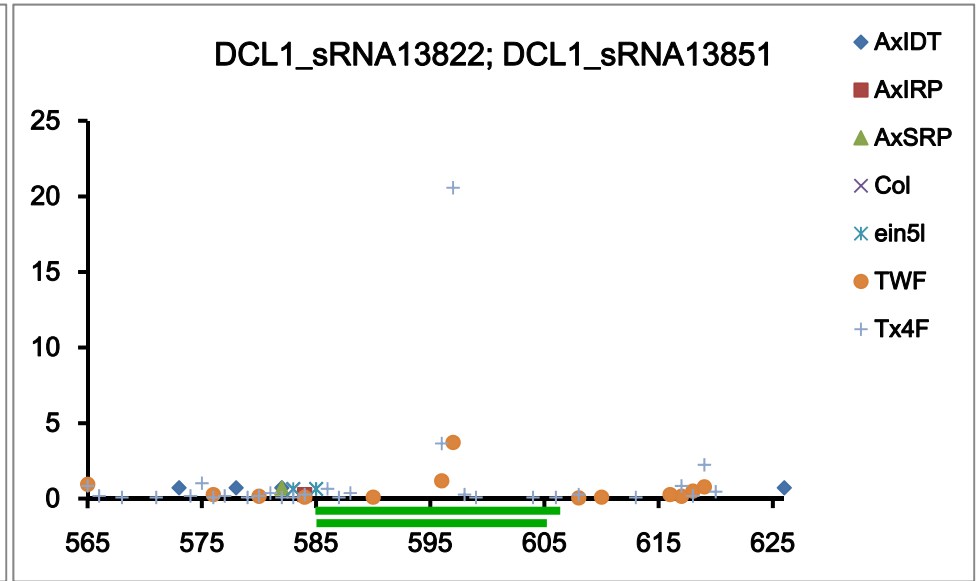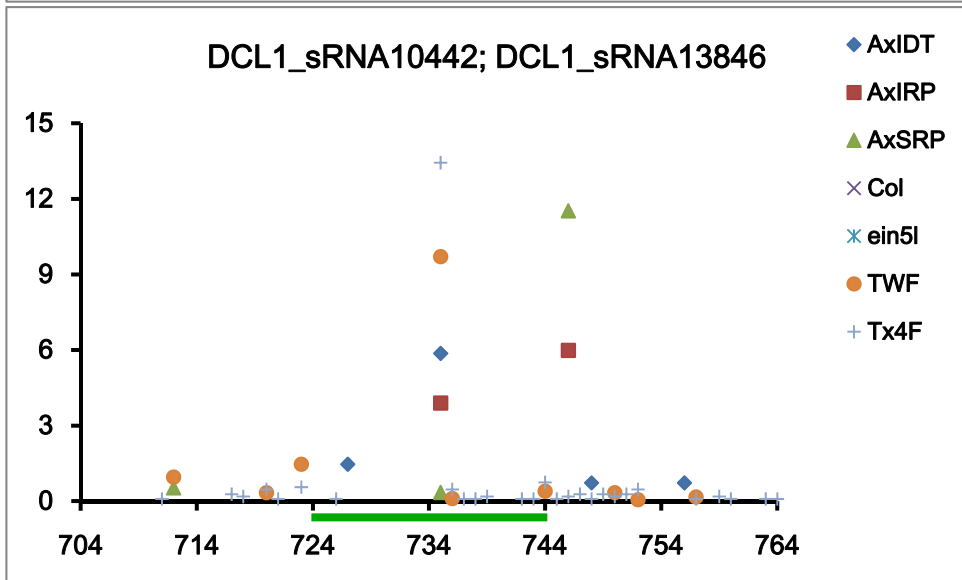

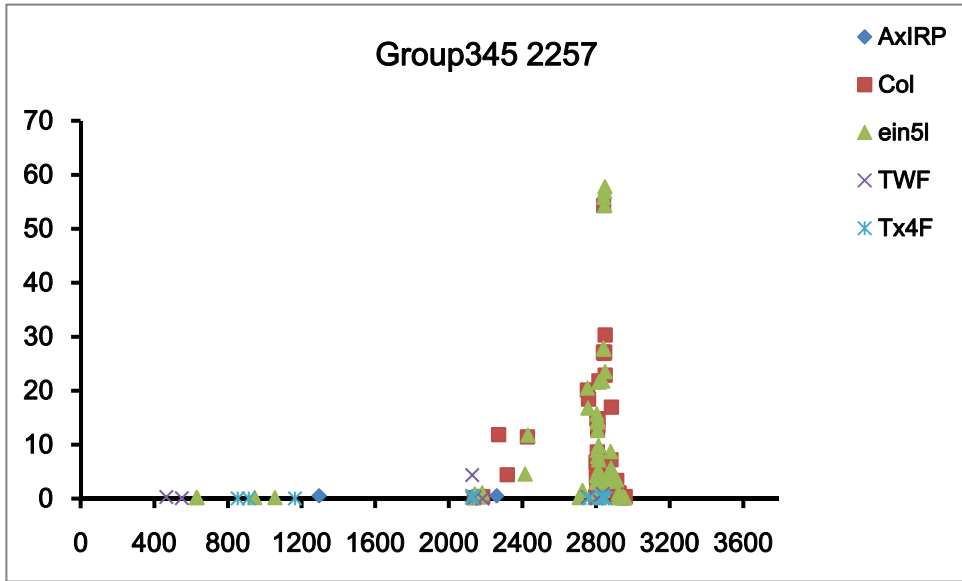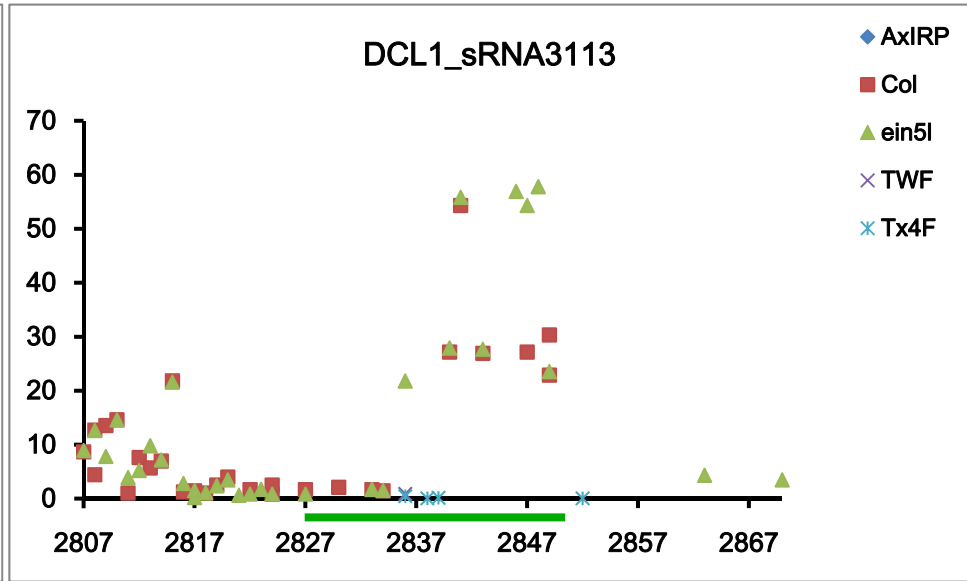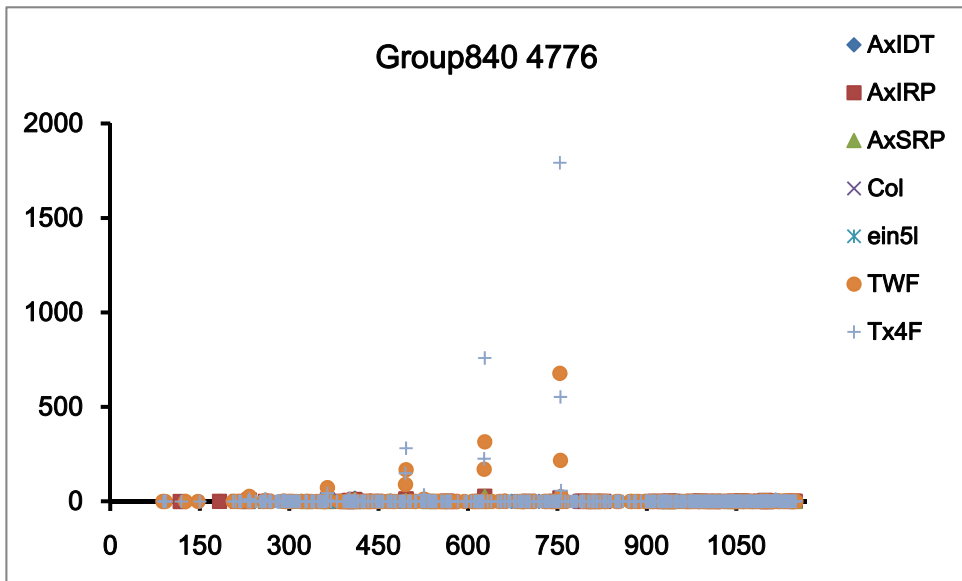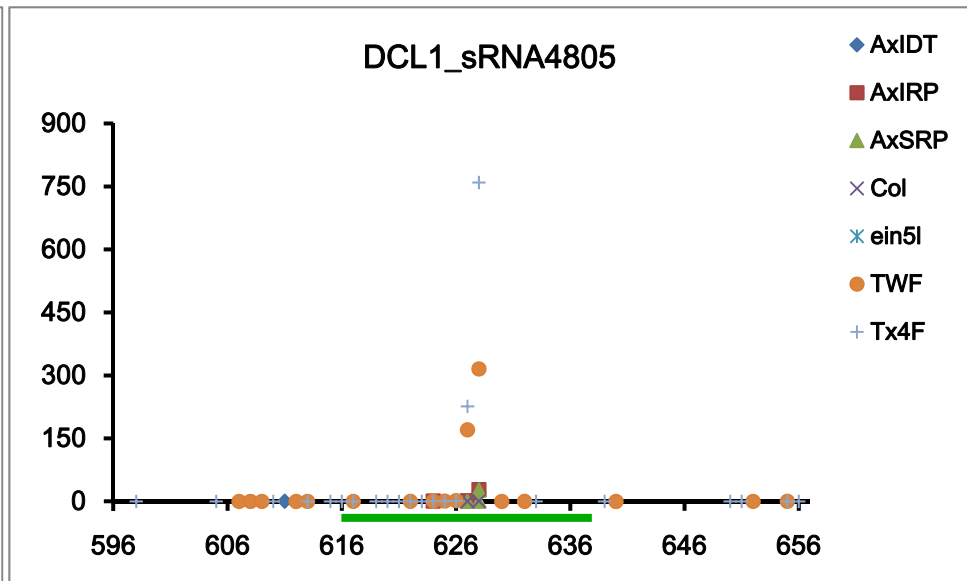

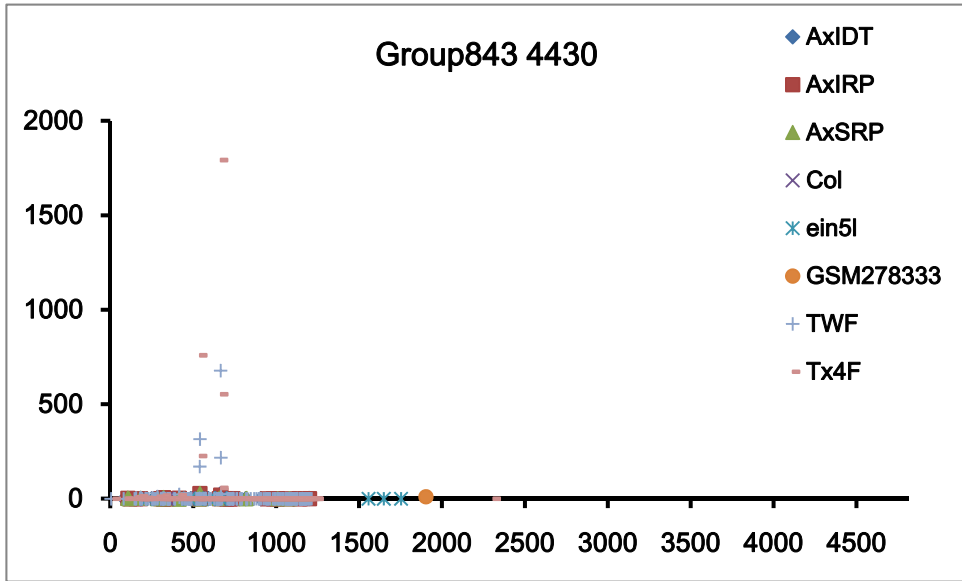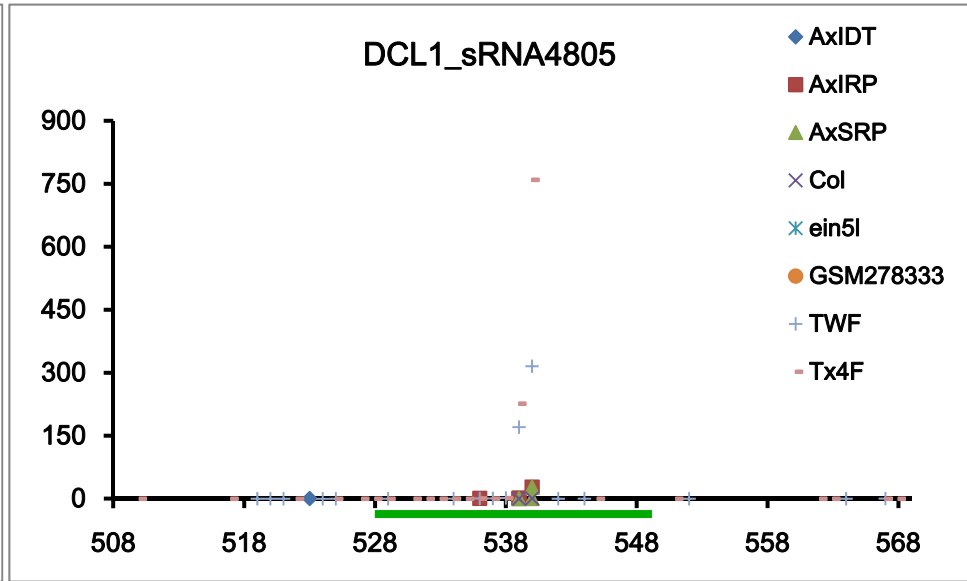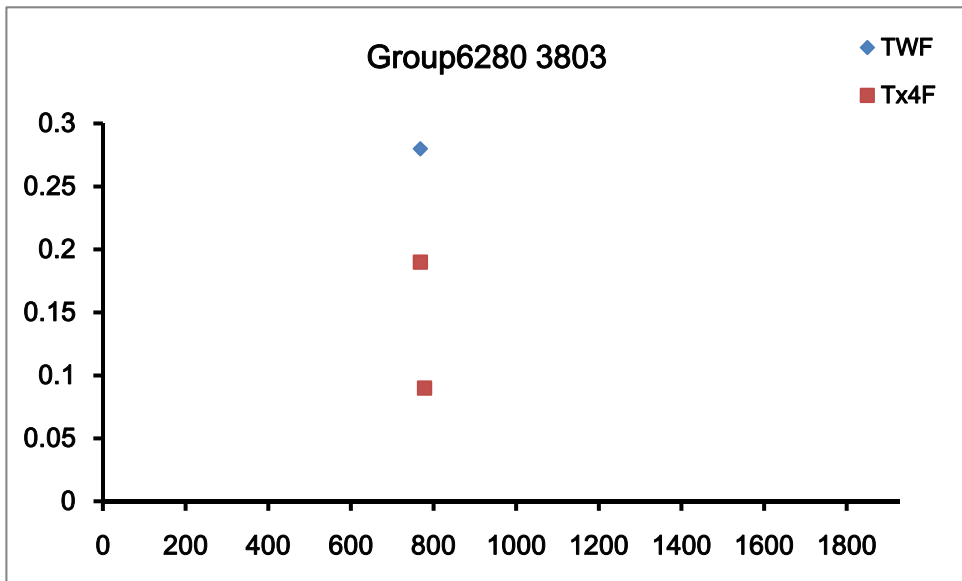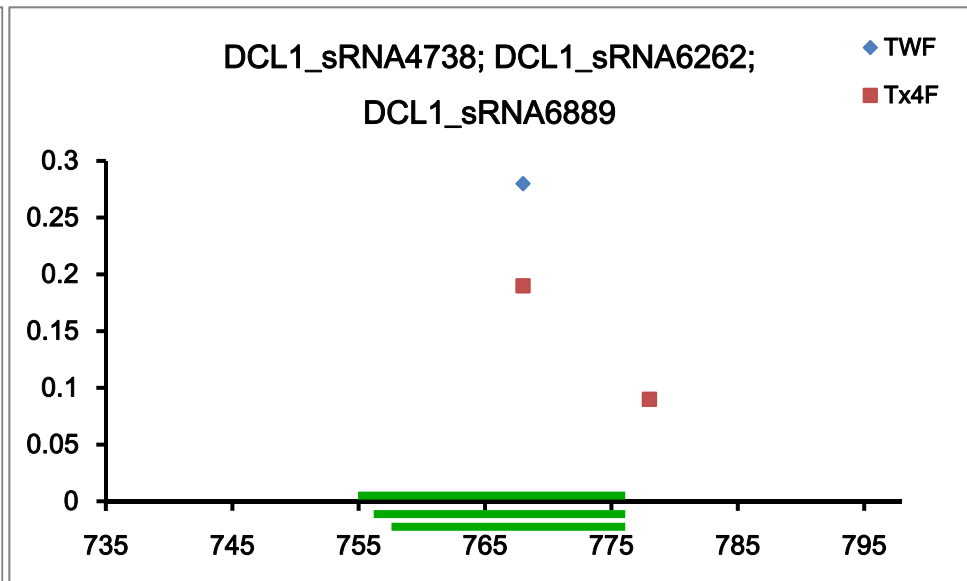

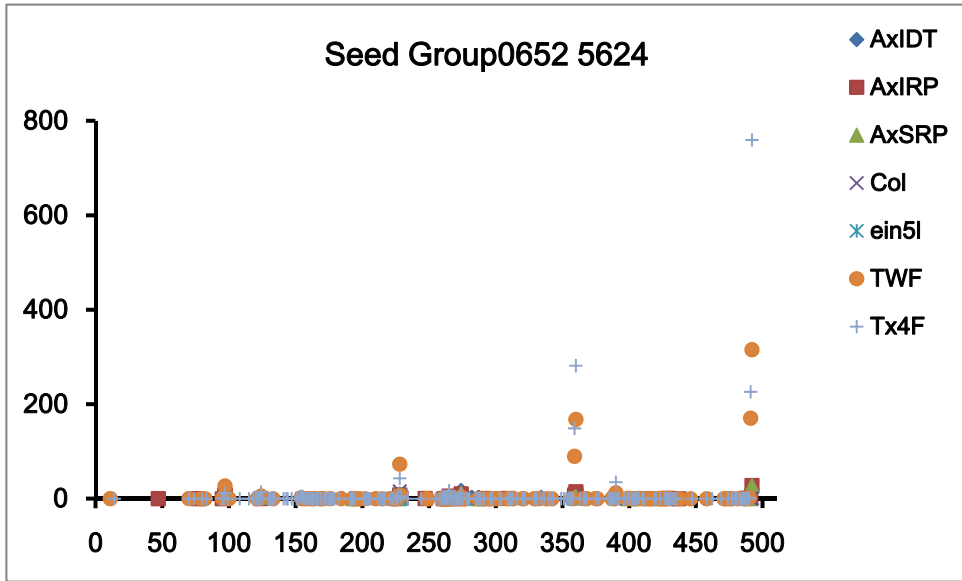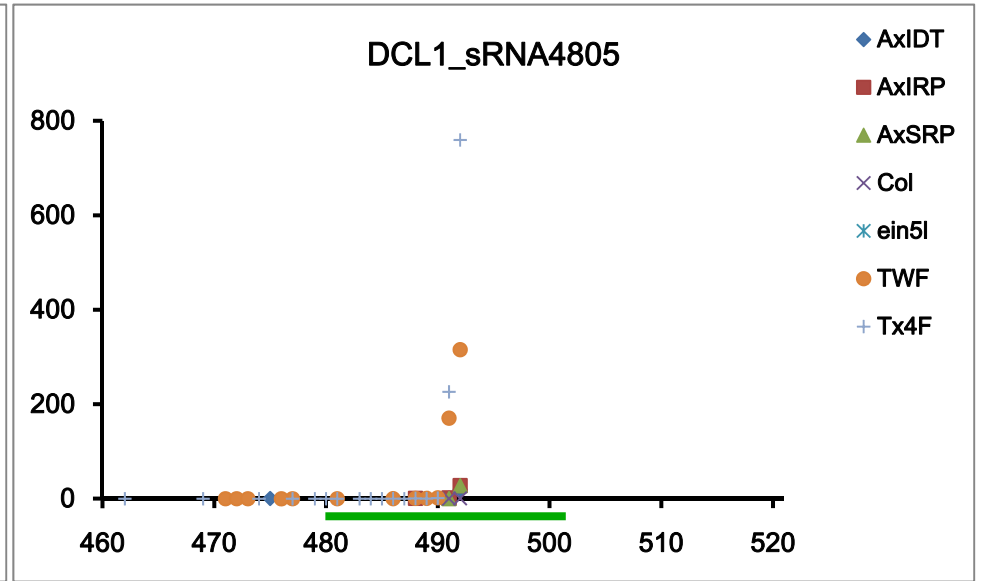

Supplement: rna-11-373-s05.pdf [file rna-11-373-s05.pdf]
